# Supplementary material for: Detection of fusion gene transcripts in the blood samples of prostate cancer patients
Source: PubMed Central journal article supplement (PMC8379170; doi:10.1038/s41598-021-96528-9), 2021-08-20

Supplemental figure 1. Taqman RT-PCR detection of MAN2A1-FER in the blood samples of prostate cancer patients.

Supplemental figure 2. Taqman RT-PCR detection of TRMT11-GRIK2 in the blood samples of prostate cancer patients.

Supplemental figure 3. Taqman RT-PCR detection of mTOR-TP53BP1 in the blood samples of prostate cancer patients.

Supplemental figure 4. Taqman RT-PCR detection of CCNH-c5orf30 in the blood samples of prostate cancer patients.

Supplemental figure 5. Taqman RT-PCR detection of KDM4B-AC011523.2 in the blood samples of prostate cancer patients.

Supplemental figure 6. Taqman RT-PCR detection of SLC45A2-AMACR in the blood samples of prostate cancer patients.

Supplemental figure 7. Taqman RT-PCR detection of TMEM135-CCDC67 in the blood samples of prostate cancer patients.

Supplemental figure 8. Taqman RT-PCR detection of LRRC59-FLJ60017 in the blood samples of prostate cancer patients.

Supplemental figure 9. Taqman RT-PCR detection of Pten-NOLC1 in the blood samples of prostate cancer patients.

Supplemental figure 10. Taqman RT-PCR detection of  $\beta$ -actin in the blood samples of prostate cancer patients.

Supplemental figure 11. Images of representative Sanger's sequencings of fusion transcripts from the blood samples of the prostate cancer patients. Twenty to 100% of blood samples positive for fusion genes KDM4B-AC011523.2, CCNH-c5orf30, mTOR-TP53BP1, MAN2A1-FER, SLC45A2-AMACR and Pten-NOLC1 were sequenced using Sanger's method. The fusion juncture regions were shown and indicated.

# Supplemental figure 1

## MAN2A1-FER fusion detection

### MAN2A1-FER-PROSTATE-BLOOD SAMPLE 1-20

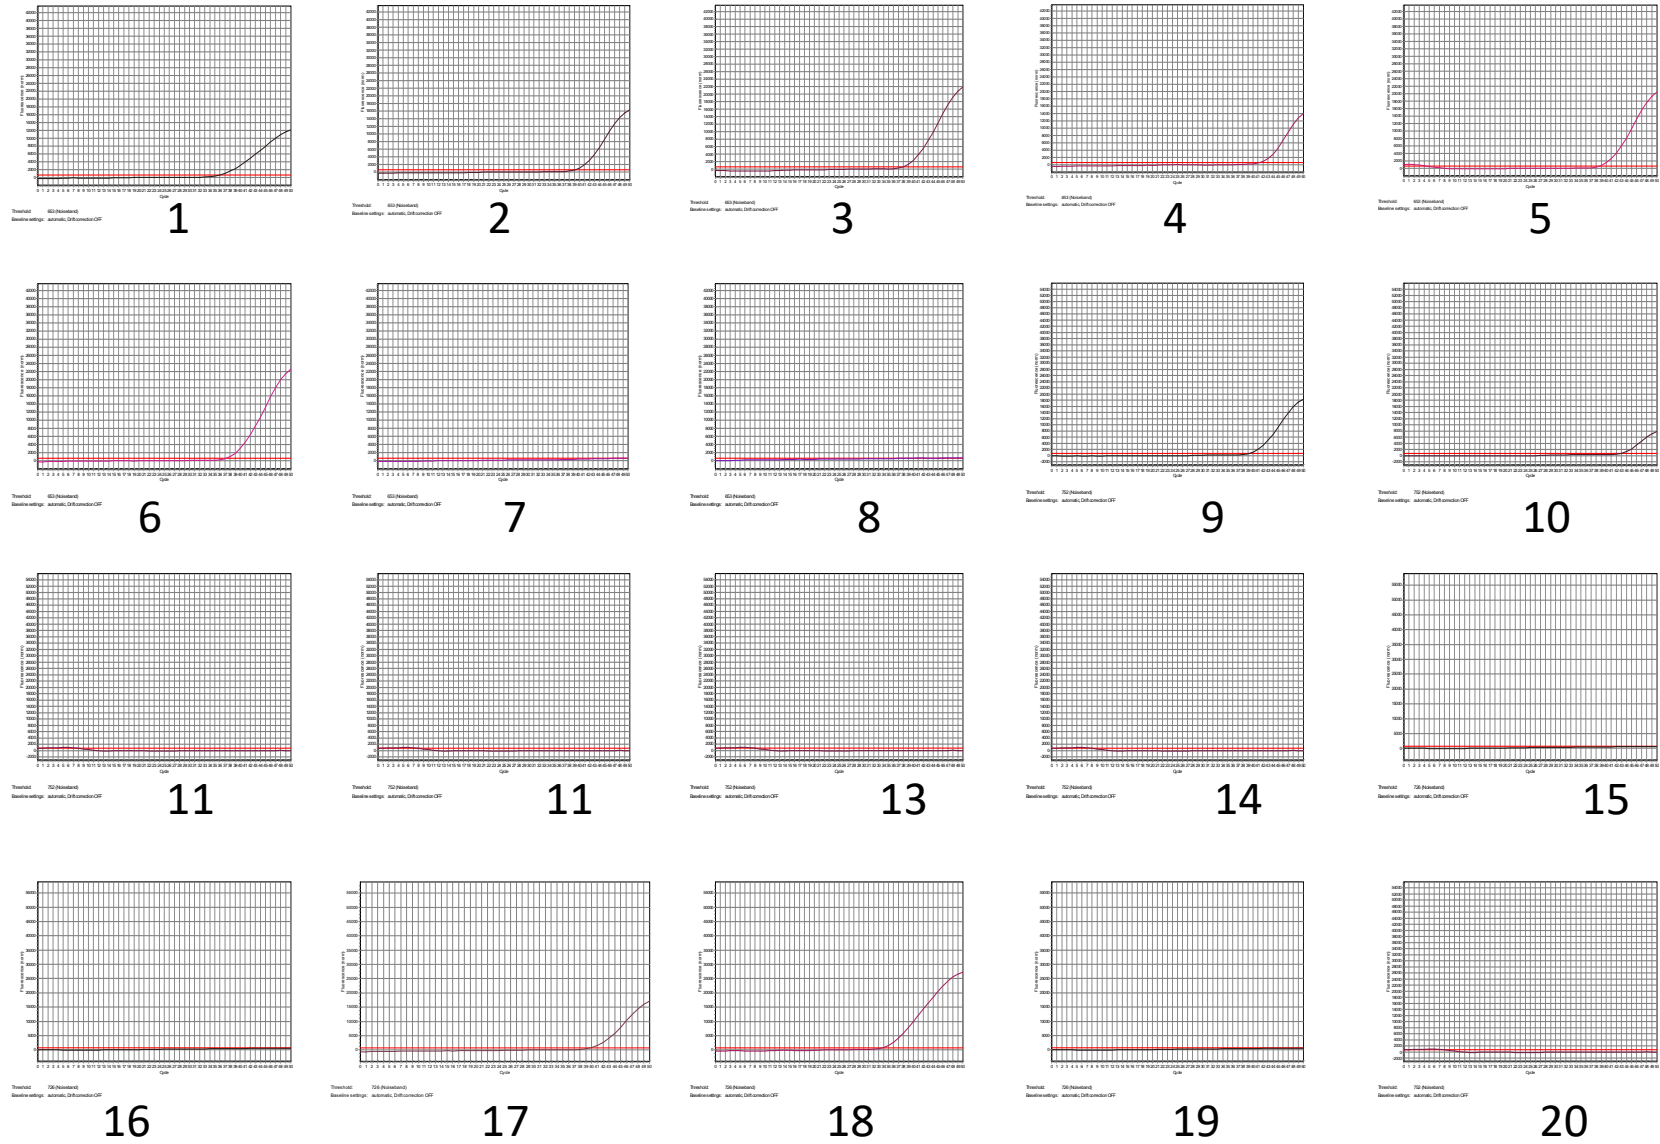

# MAN2A1-FER-PROSTATE-BLOOD SAMPLE 21-40

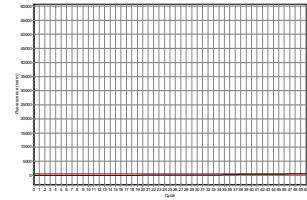

21

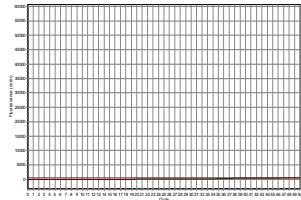

22

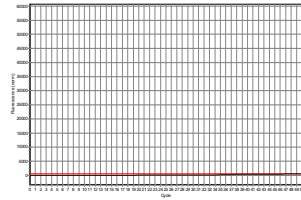

23

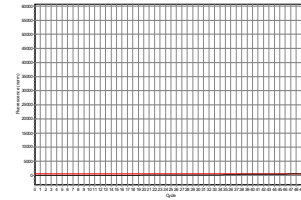

24

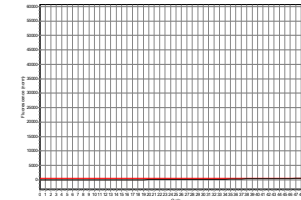

25

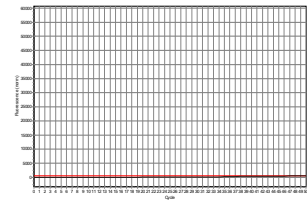

26

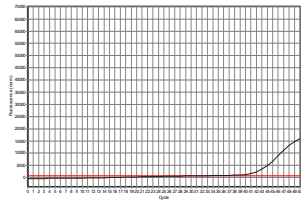

27

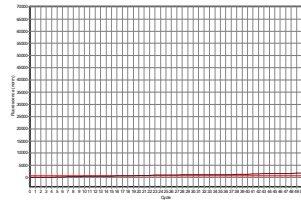

28

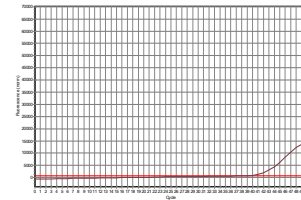

29

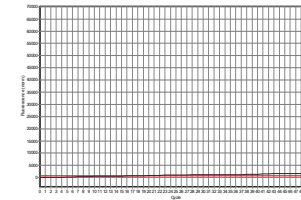

30

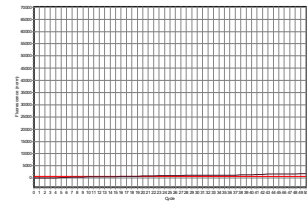

31

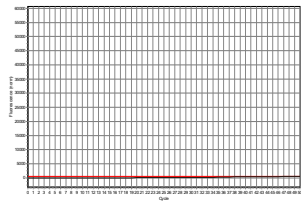

32

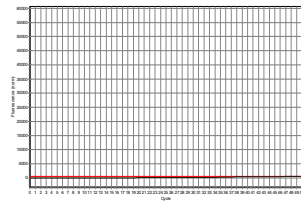

33

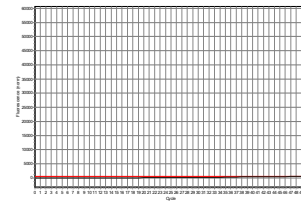

34

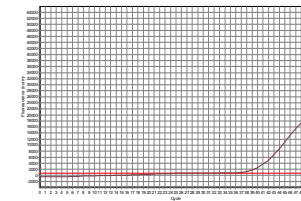

35

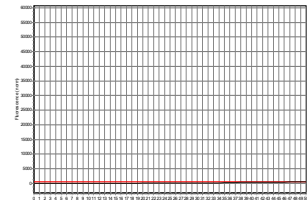

36

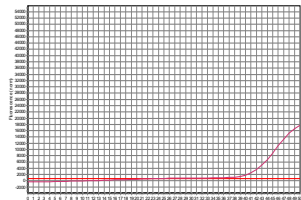

37

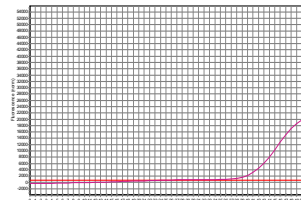

38

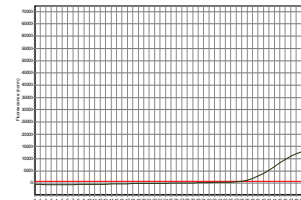

39

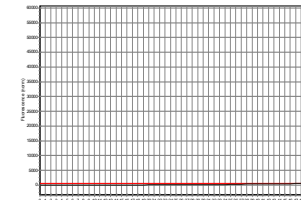

40

# MAN2A1-FER-PROSTATE-BLOOD SAMPLE 41-60

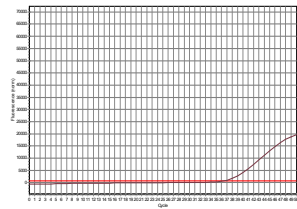

41

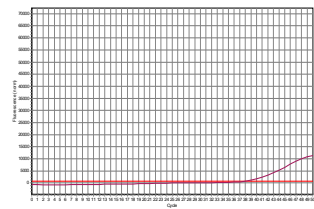

42

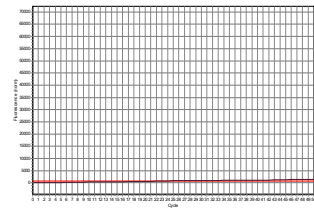

43

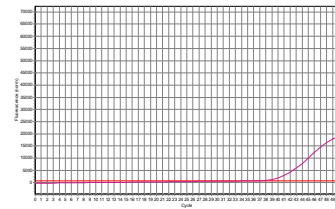

44

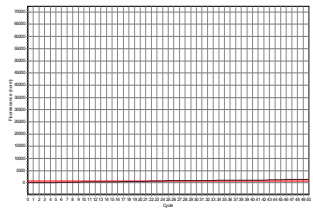

45

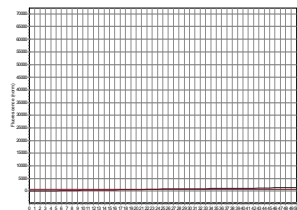

46

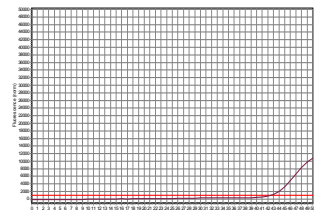

47

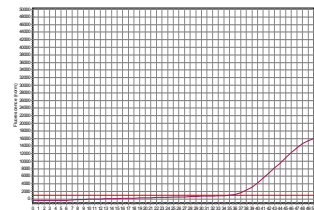

47

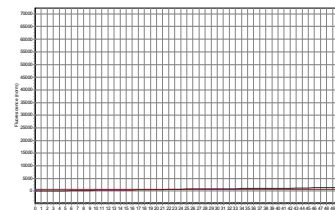

49

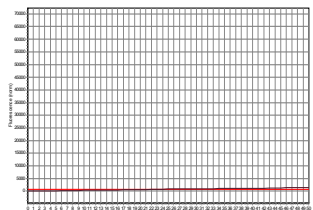

50

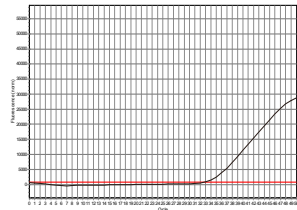

51

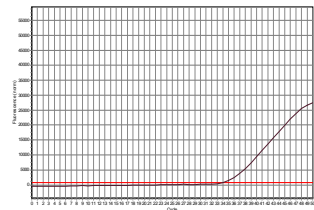

52

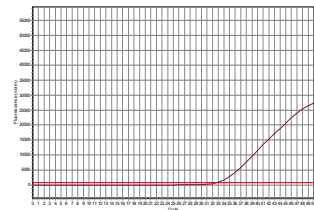

53

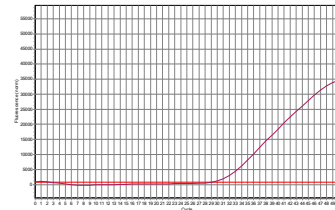

54

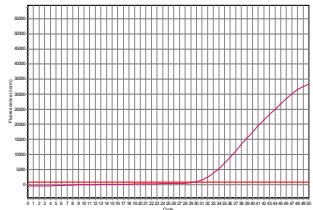

55

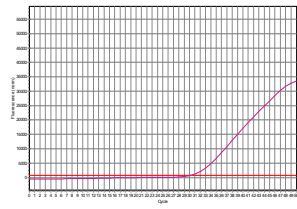

56

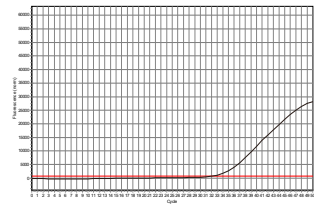

57

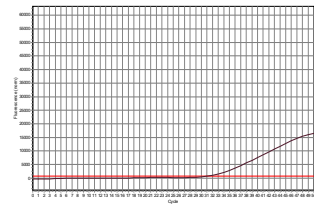

58

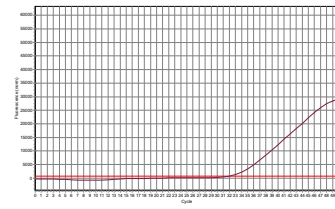

59

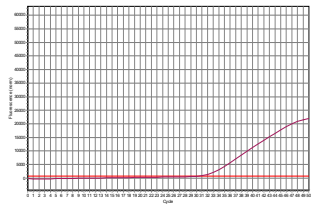

60

# MAN2A1-FER-PROSTATE-BLOOD SAMPLE 61-80

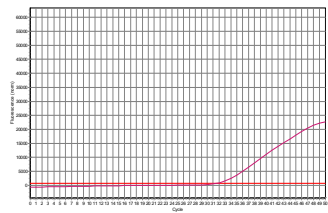

Threshold: 750 (Nonband)  
Baseline settings: automatic, DR correction OFF

61

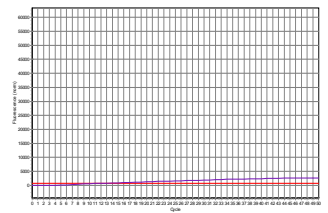

Threshold: 750 (Nonband)  
Baseline settings: automatic, DR correction OFF

62

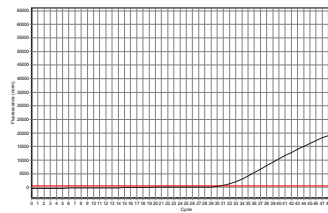

Threshold: 510 (Nonband)  
Baseline settings: automatic, DR correction OFF

63

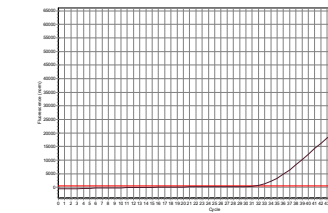

Threshold: 510 (Nonband)  
Baseline settings: automatic, DR correction OFF

64

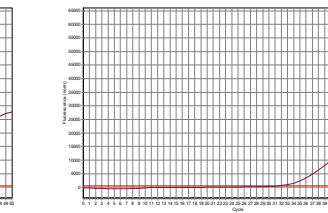

Threshold: 510 (Nonband)  
Baseline settings: automatic, DR correction OFF

65

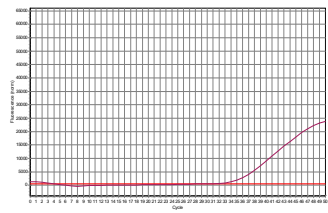

Threshold: 510 (Nonband)  
Baseline settings: automatic, DR correction OFF

66

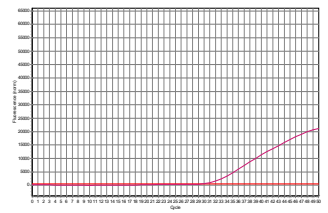

Threshold: 510 (Nonband)  
Baseline settings: automatic, DR correction OFF

67

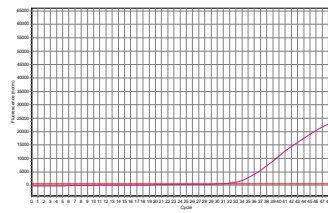

Threshold: 510 (Nonband)  
Baseline settings: automatic, DR correction OFF

68

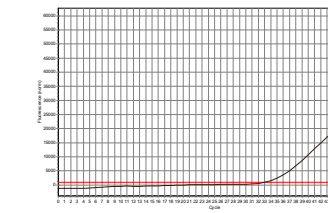

Threshold: 100 (Nonband)  
Baseline settings: automatic, DR correction OFF

69

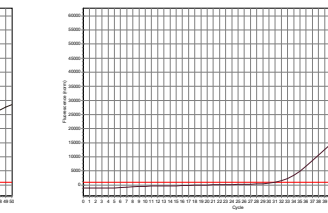

Threshold: 100 (Nonband)  
Baseline settings: automatic, DR correction OFF

70

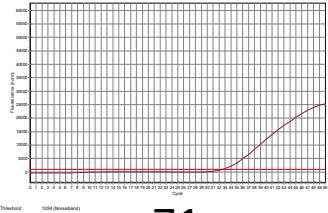

Threshold: 100 (Nonband)  
Baseline settings: automatic, DR correction OFF

71

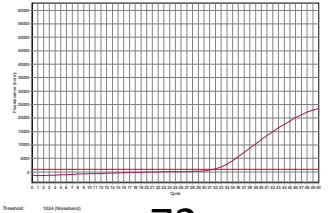

Threshold: 100 (Nonband)  
Baseline settings: automatic, DR correction OFF

72

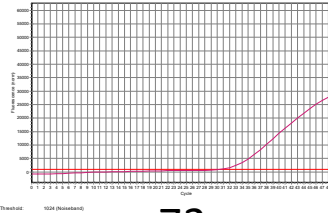

Threshold: 100 (Nonband)  
Baseline settings: automatic, DR correction OFF

73

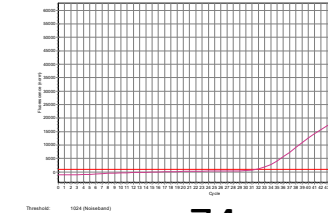

Threshold: 100 (Nonband)  
Baseline settings: automatic, DR correction OFF

74

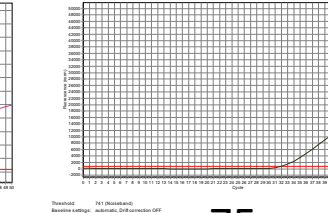

Threshold: 71 (Nonband)  
Baseline settings: automatic, DR correction OFF

75

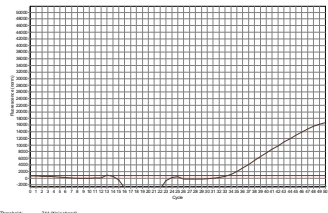

Threshold: 71 (Nonband)  
Baseline settings: automatic, DR correction OFF

76

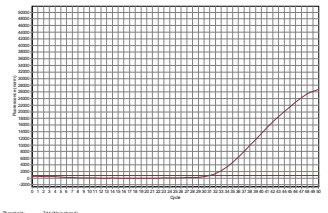

Threshold: 71 (Nonband)  
Baseline settings: automatic, DR correction OFF

77

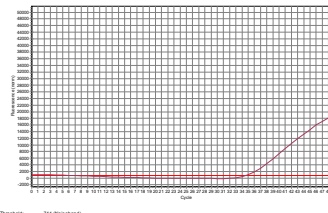

Threshold: 71 (Nonband)  
Baseline settings: automatic, DR correction OFF

78

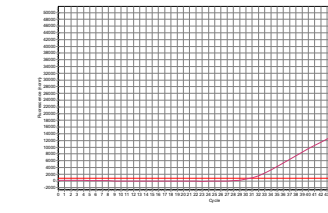

Threshold: 71 (Nonband)  
Baseline settings: automatic, DR correction OFF

79

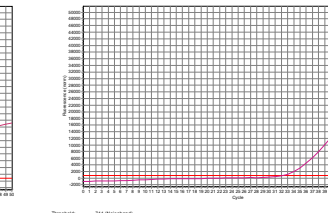

Threshold: 71 (Nonband)  
Baseline settings: automatic, DR correction OFF

80

# MAN2A1-FER-PROSTATE-BLOOD SAMPLE 81-100

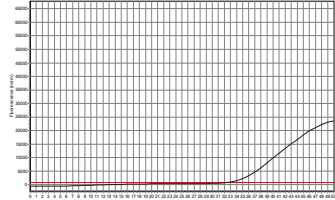

Threshold: 850 (Nonstandard)  
Baseline settings: automatic, DR correction OFF

**81**

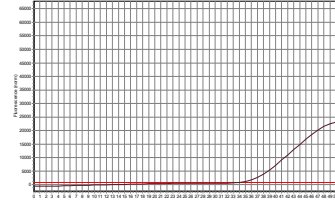

Threshold: 850 (Nonstandard)  
Baseline settings: automatic, DR correction OFF

**82**

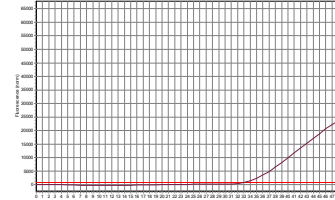

Threshold: 850 (Nonstandard)  
Baseline settings: automatic, DR correction OFF

**83**

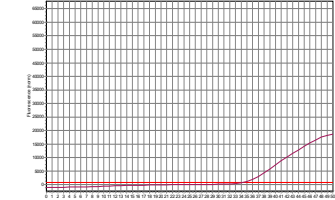

Threshold: 850 (Nonstandard)  
Baseline settings: automatic, DR correction OFF

**84**

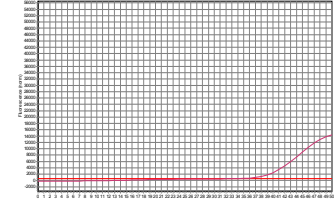

Threshold: 850 (Nonstandard)  
Baseline settings: automatic, DR correction OFF

**85**

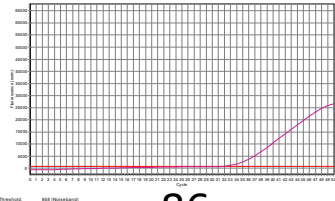

Threshold: 850 (Nonstandard)  
Baseline settings: automatic, DR correction OFF

**86**

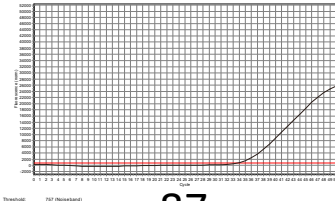

Threshold: 850 (Nonstandard)  
Baseline settings: automatic, DR correction OFF

**87**

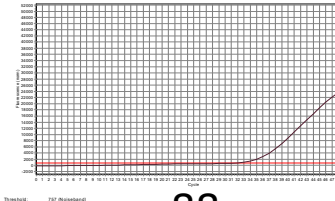

Threshold: 850 (Nonstandard)  
Baseline settings: automatic, DR correction OFF

**88**

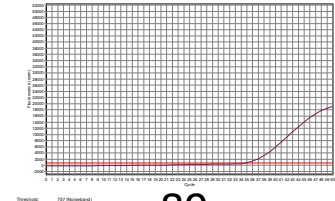

Threshold: 850 (Nonstandard)  
Baseline settings: automatic, DR correction OFF

**89**

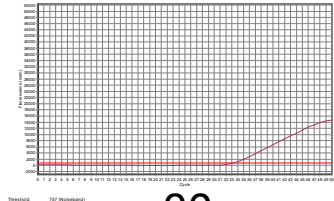

Threshold: 850 (Nonstandard)  
Baseline settings: automatic, DR correction OFF

**90**

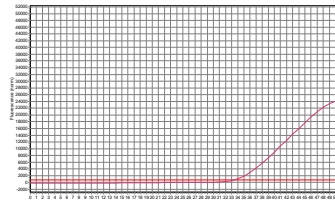

Threshold: 750 (Nonstandard)  
Baseline settings: automatic, DR correction OFF

**91**

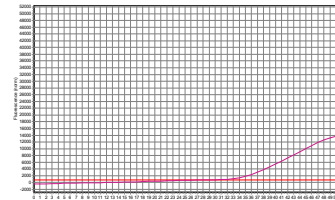

Threshold: 750 (Nonstandard)  
Baseline settings: automatic, DR correction OFF

**92**

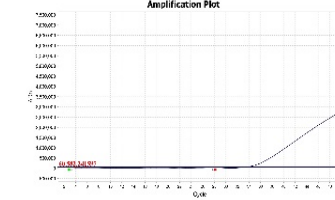

Threshold: 850 (Nonstandard)  
Baseline settings: automatic, DR correction OFF

**93**

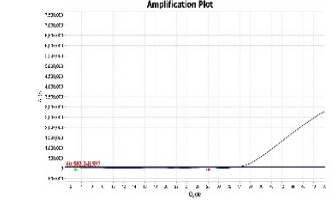

Threshold: 850 (Nonstandard)  
Baseline settings: automatic, DR correction OFF

**94**

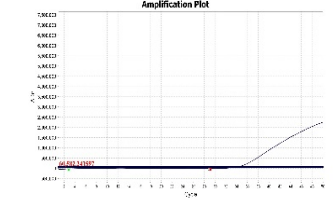

Threshold: 850 (Nonstandard)  
Baseline settings: automatic, DR correction OFF

**95**

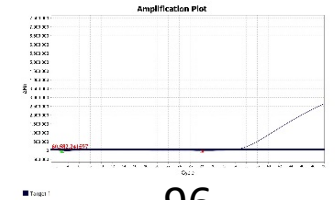

Threshold: 850 (Nonstandard)  
Baseline settings: automatic, DR correction OFF

**96**

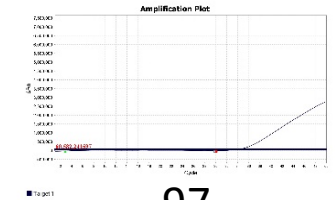

Threshold: 850 (Nonstandard)  
Baseline settings: automatic, DR correction OFF

**97**

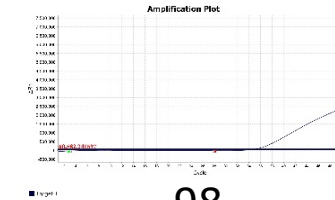

Threshold: 850 (Nonstandard)  
Baseline settings: automatic, DR correction OFF

**98**

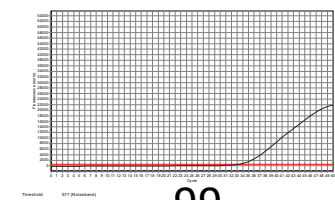

Threshold: 850 (Nonstandard)  
Baseline settings: automatic, DR correction OFF

**99**

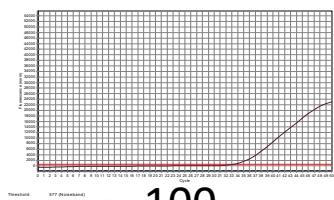

Threshold: 850 (Nonstandard)  
Baseline settings: automatic, DR correction OFF

**100**

# MAN2A1-FER-PROSTATE-BLOOD SAMPLE 101-120

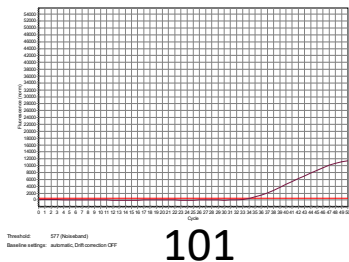

101

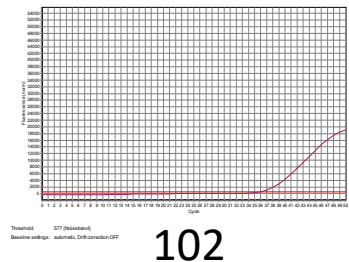

102

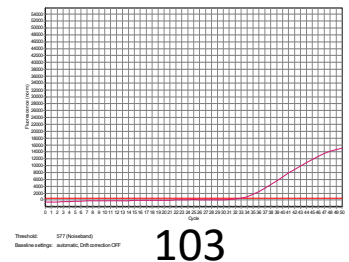

103

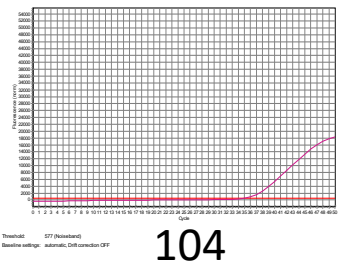

104

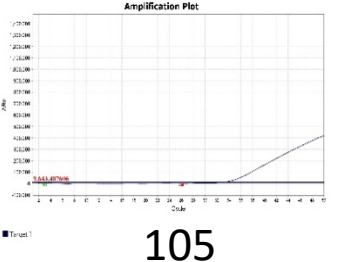

105

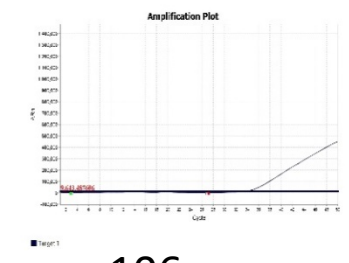

106

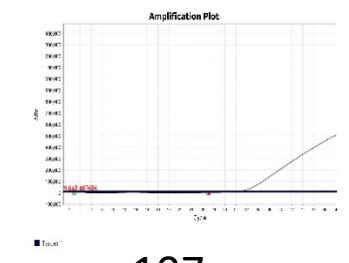

107

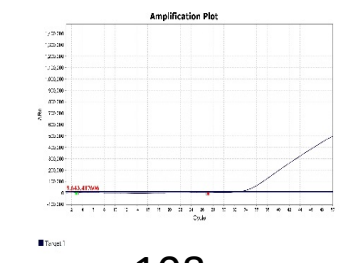

108

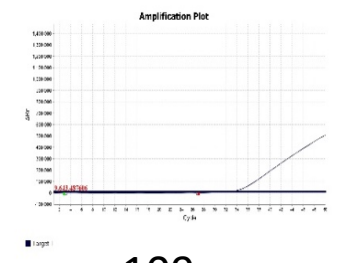

109

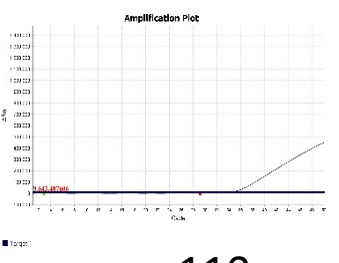

110

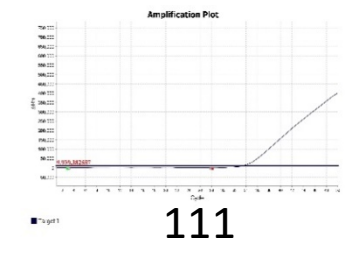

111

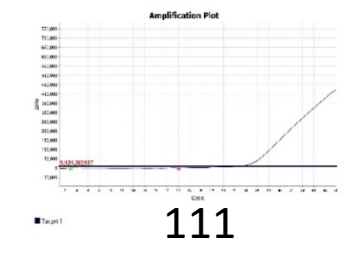

111

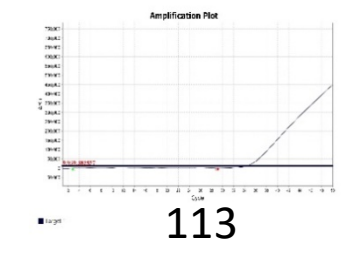

113

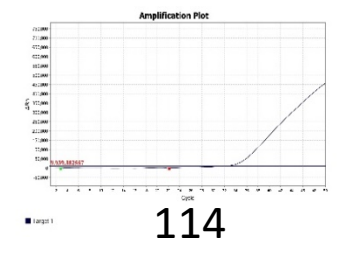

114

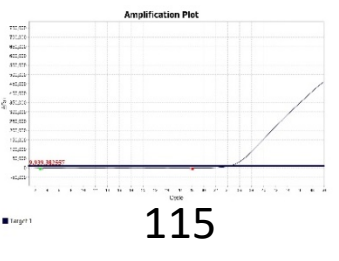

115

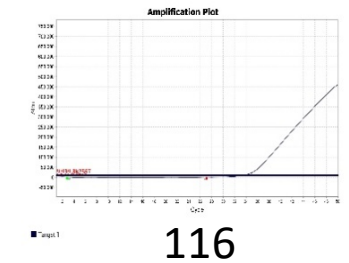

116

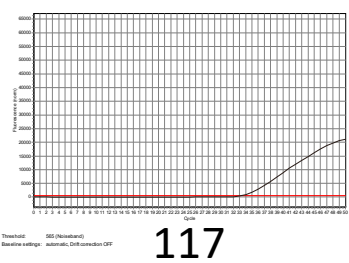

117

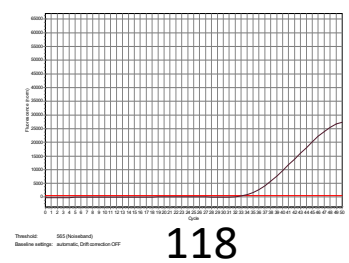

118

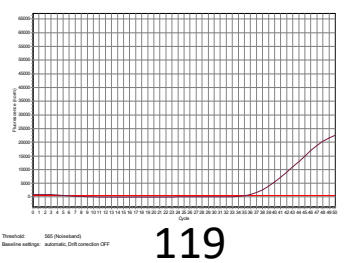

119

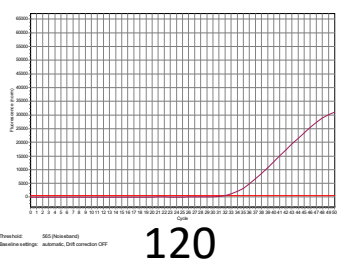

120



# MAN2A1-FER-PROSTATE-BLOOD SAMPLE 121-140

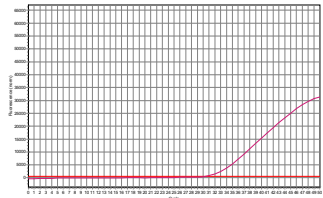

Threshold: SS2 (Histogram)  
Baseline settings: automatic, DR correction OFF

121

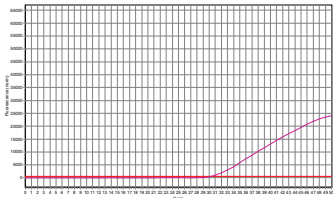

Threshold: SS2 (Histogram)  
Baseline settings: automatic, DR correction OFF

122

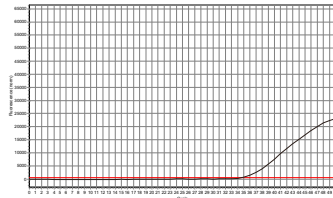

Threshold: SS2 (Histogram)  
Baseline settings: automatic, DR correction OFF

123

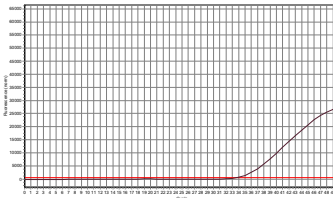

Threshold: SS2 (Histogram)  
Baseline settings: automatic, DR correction OFF

124

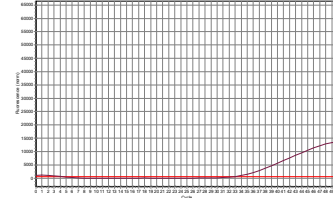

Threshold: SS2 (Histogram)  
Baseline settings: automatic, DR correction OFF

125

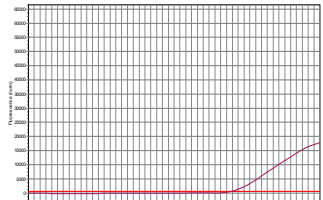

Threshold: SS2 (Histogram)  
Baseline settings: automatic, DR correction OFF

126

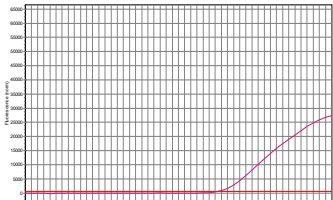

Threshold: SS2 (Histogram)  
Baseline settings: automatic, DR correction OFF

127

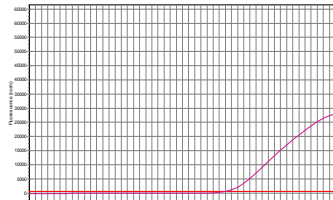

Threshold: SS2 (Histogram)  
Baseline settings: automatic, DR correction OFF

128

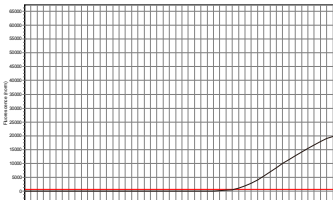

Threshold: SS2 (Histogram)  
Baseline settings: automatic, DR correction OFF

129

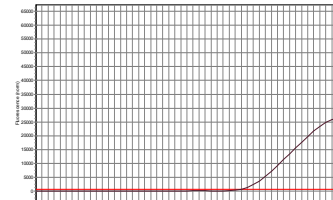

Threshold: SS2 (Histogram)  
Baseline settings: automatic, DR correction OFF

130

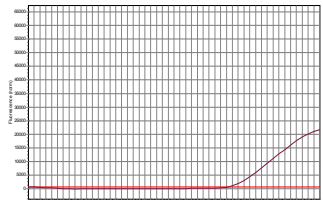

Threshold: SS2 (Histogram)  
Baseline settings: automatic, DR correction OFF

131

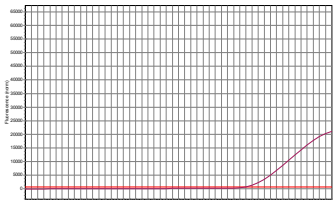

Threshold: SS2 (Histogram)  
Baseline settings: automatic, DR correction OFF

132

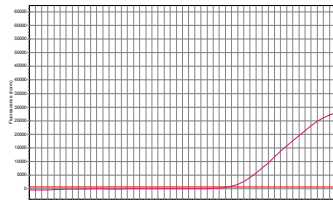

Threshold: SS2 (Histogram)  
Baseline settings: automatic, DR correction OFF

133

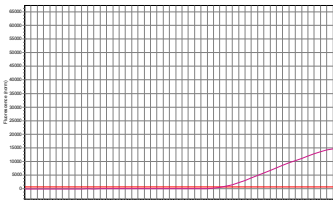

Threshold: SS2 (Histogram)  
Baseline settings: automatic, DR correction OFF

134

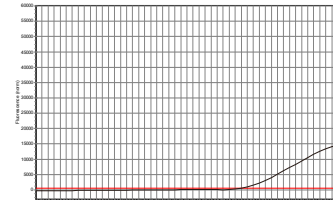

Threshold: SS2 (Histogram)  
Baseline settings: automatic, DR correction OFF

135

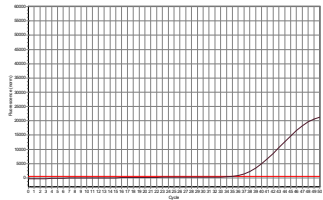

Threshold: SS2 (Histogram)  
Baseline settings: automatic, DR correction OFF

136

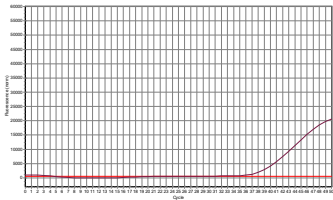

Threshold: SS2 (Histogram)  
Baseline settings: automatic, DR correction OFF

137

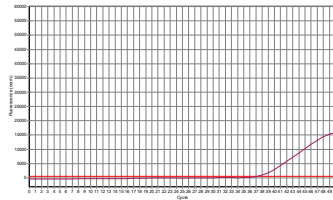

Threshold: SS2 (Histogram)  
Baseline settings: automatic, DR correction OFF

138

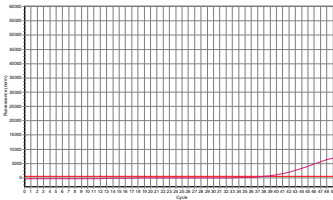

Threshold: SS2 (Histogram)  
Baseline settings: automatic, DR correction OFF

139

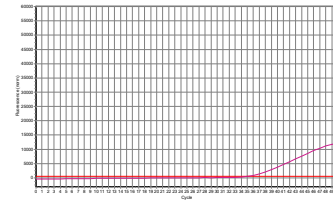

Threshold: SS2 (Histogram)  
Baseline settings: automatic, DR correction OFF

140

# MAN2A1-FER-PROSTATE-BLOOD SAMPLE 141-150

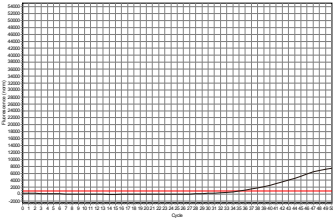

Threshold: ISG (Adjusted manually)  
Baseline settings: automatic, DR correction OFF

141

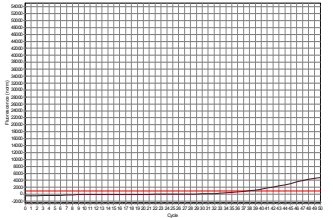

Threshold: ISG (Adjusted manually)  
Baseline settings: automatic, DR correction OFF

142

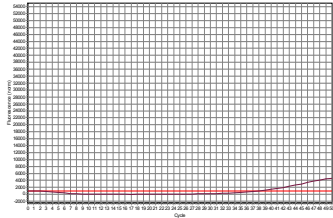

Threshold: ISG (Adjusted manually)  
Baseline settings: automatic, DR correction OFF

143

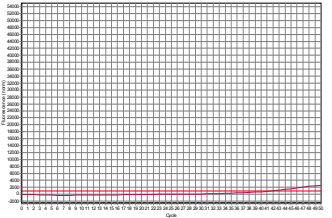

Threshold: ISG (Adjusted manually)  
Baseline settings: automatic, DR correction OFF

144

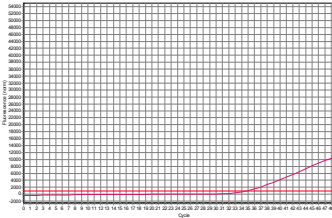

Threshold: ISG (Adjusted manually)  
Baseline settings: automatic, DR correction OFF

145

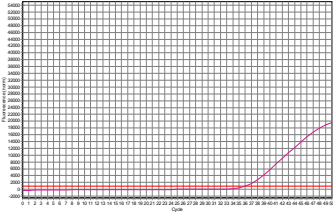

Threshold: ISG (Adjusted manually)  
Baseline settings: automatic, DR correction OFF

146

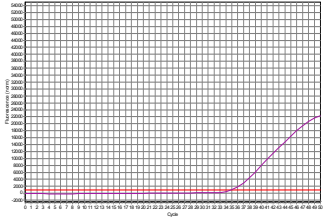

Threshold: ISG (Adjusted manually)  
Baseline settings: automatic, DR correction OFF

147

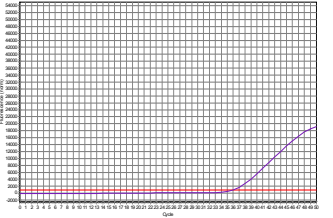

Threshold: ISG (Adjusted manually)  
Baseline settings: automatic, DR correction OFF

148

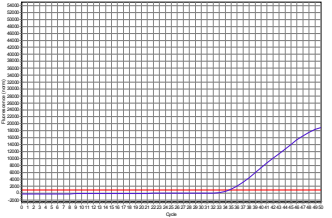

Threshold: ISG (Adjusted manually)  
Baseline settings: automatic, DR correction OFF

149

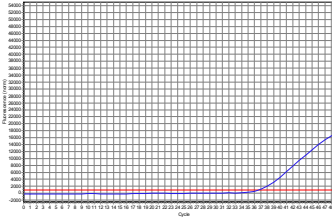

Threshold: ISG (Adjusted manually)  
Baseline settings: automatic, DR correction OFF

150



# TRMT11-GRIK2-PROSTATE-BLOOD SAMPLE 21-40

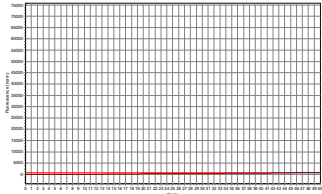

Threshold: 657 (Non-zero)  
Baseline settings: automatic, DSB correction OFF

21

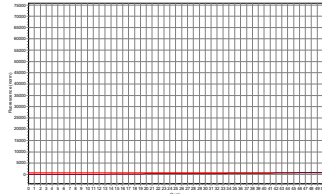

Threshold: 657 (Non-zero)  
Baseline settings: automatic, DSB correction OFF

22

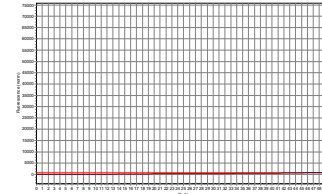

Threshold: 657 (Non-zero)  
Baseline settings: automatic, DSB correction OFF

23

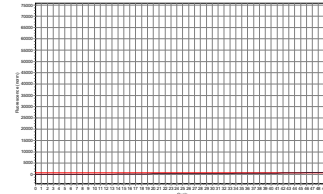

Threshold: 657 (Non-zero)  
Baseline settings: automatic, DSB correction OFF

24

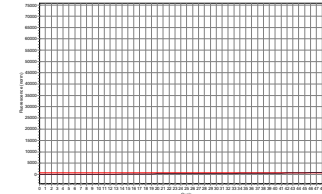

Threshold: 657 (Non-zero)  
Baseline settings: automatic, DSB correction OFF

25

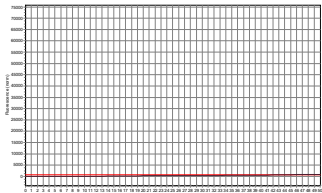

Threshold: 657 (Non-zero)  
Baseline settings: automatic, DSB correction OFF

26

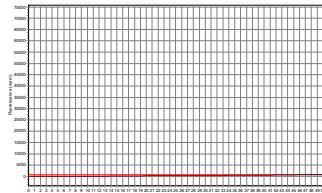

Threshold: 657 (Non-zero)  
Baseline settings: automatic, DSB correction OFF

27

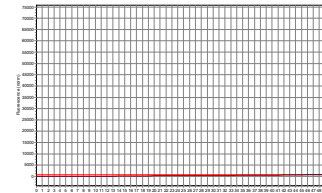

Threshold: 657 (Non-zero)  
Baseline settings: automatic, DSB correction OFF

28

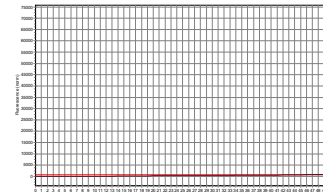

Threshold: 657 (Non-zero)  
Baseline settings: automatic, DSB correction OFF

29

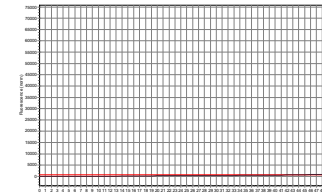

Threshold: 657 (Non-zero)  
Baseline settings: automatic, DSB correction OFF

30

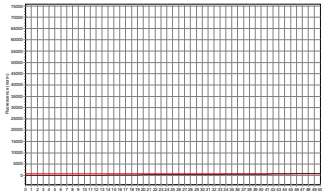

Threshold: 657 (Non-zero)  
Baseline settings: automatic, DSB correction OFF

31

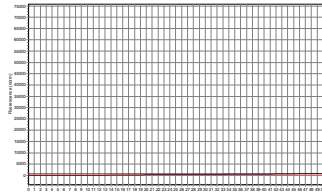

Threshold: 657 (Non-zero)  
Baseline settings: automatic, DSB correction OFF

32

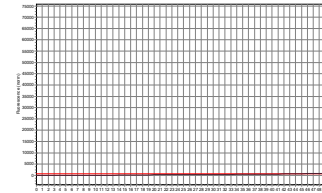

Threshold: 657 (Non-zero)  
Baseline settings: automatic, DSB correction OFF

33

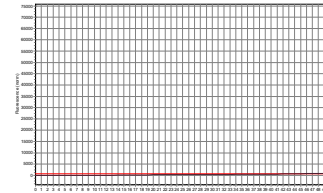

Threshold: 657 (Non-zero)  
Baseline settings: automatic, DSB correction OFF

34

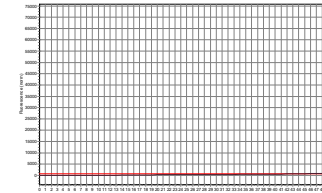

Threshold: 657 (Non-zero)  
Baseline settings: automatic, DSB correction OFF

35

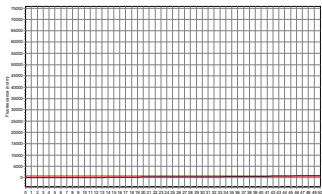

Threshold: 657 (Non-zero)  
Baseline settings: automatic, DSB correction OFF

36

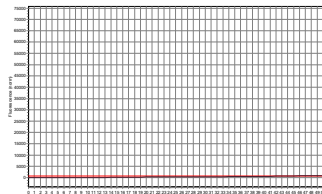

Threshold: 657 (Non-zero)  
Baseline settings: automatic, DSB correction OFF

37

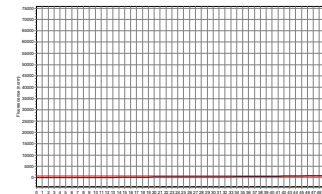

Threshold: 657 (Non-zero)  
Baseline settings: automatic, DSB correction OFF

38

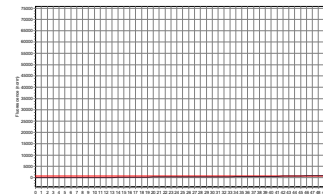

Threshold: 657 (Non-zero)  
Baseline settings: automatic, DSB correction OFF

39

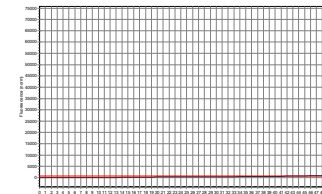

Threshold: 657 (Non-zero)  
Baseline settings: automatic, DSB correction OFF

40

# TRMT11-GRIK2-PROSTATE-BLOOD SAMPLE 41-60

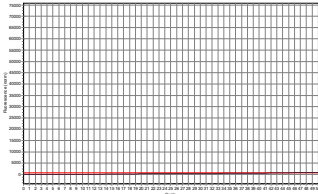

Threatest: 657 (Non-zero)  
Baseline settings: automatic, DR correction OFF

41

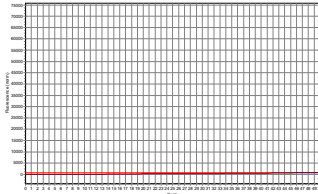

Threatest: 657 (Non-zero)  
Baseline settings: automatic, DR correction OFF

42

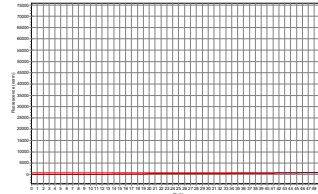

Threatest: 657 (Non-zero)  
Baseline settings: automatic, DR correction OFF

43

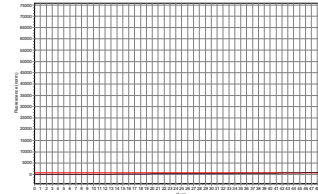

Threatest: 657 (Non-zero)  
Baseline settings: automatic, DR correction OFF

44

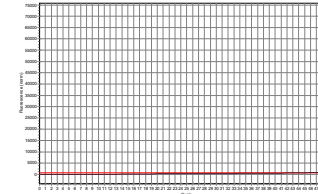

Threatest: 657 (Non-zero)  
Baseline settings: automatic, DR correction OFF

45

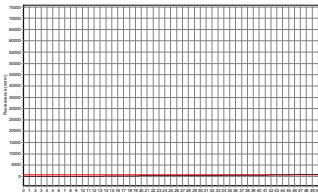

Threatest: 657 (Non-zero)  
Baseline settings: automatic, DR correction OFF

46

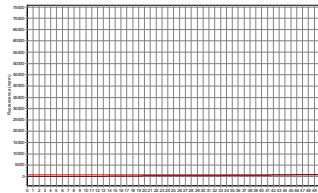

Threatest: 657 (Non-zero)  
Baseline settings: automatic, DR correction OFF

47

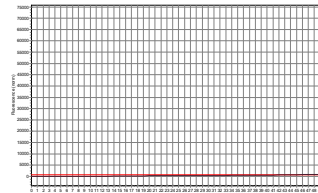

Threatest: 657 (Non-zero)  
Baseline settings: automatic, DR correction OFF

47

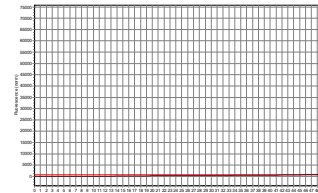

Threatest: 657 (Non-zero)  
Baseline settings: automatic, DR correction OFF

49

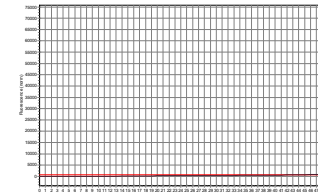

Threatest: 657 (Non-zero)  
Baseline settings: automatic, DR correction OFF

50

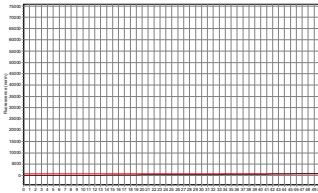

Threatest: 657 (Non-zero)  
Baseline settings: automatic, DR correction OFF

51

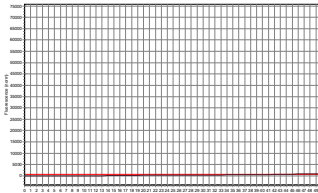

Threatest: 657 (Non-zero)  
Baseline settings: automatic, DR correction OFF

52

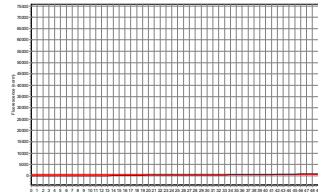

Threatest: 657 (Non-zero)  
Baseline settings: automatic, DR correction OFF

53

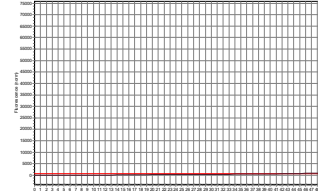

Threatest: 657 (Non-zero)  
Baseline settings: automatic, DR correction OFF

54

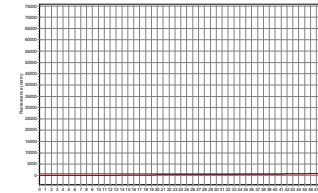

Threatest: 657 (Non-zero)  
Baseline settings: automatic, DR correction OFF

55

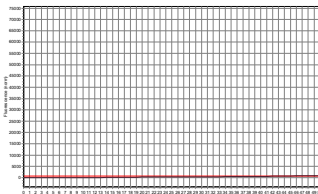

Threatest: 657 (Non-zero)  
Baseline settings: automatic, DR correction OFF

56

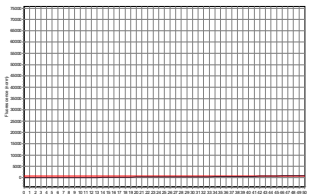

Threatest: 657 (Non-zero)  
Baseline settings: automatic, DR correction OFF

57

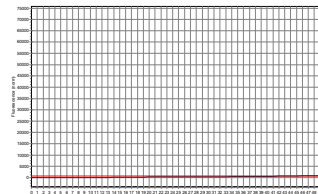

Threatest: 657 (Non-zero)  
Baseline settings: automatic, DR correction OFF

58

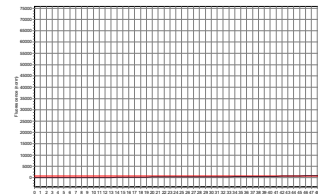

Threatest: 657 (Non-zero)  
Baseline settings: automatic, DR correction OFF

59

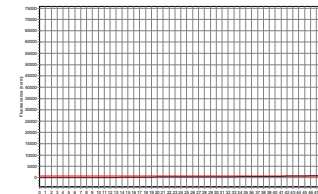

Threatest: 657 (Non-zero)  
Baseline settings: automatic, DR correction OFF

60

# TRMT11-GRIK2-PROSTATE-BLOOD SAMPLE 61-80

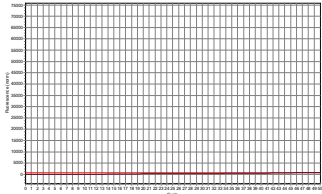

Threat: 657 (NonMatch)  
Baseline settings: automatic, DfH correction OFF

61

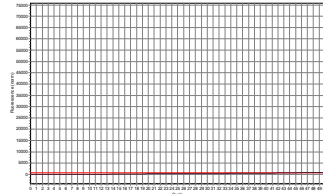

Threat: 657 (NonMatch)  
Baseline settings: automatic, DfH correction OFF

62

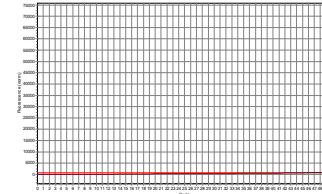

Threat: 657 (NonMatch)  
Baseline settings: automatic, DfH correction OFF

63

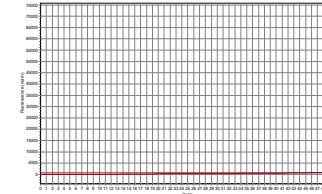

Threat: 657 (NonMatch)  
Baseline settings: automatic, DfH correction OFF

64

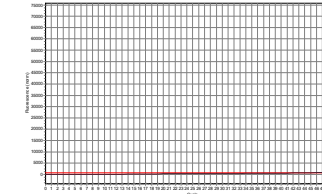

Threat: 657 (NonMatch)  
Baseline settings: automatic, DfH correction OFF

65

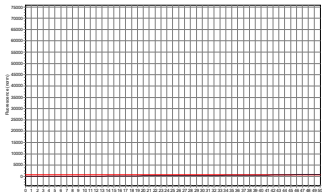

Threat: 657 (NonMatch)  
Baseline settings: automatic, DfH correction OFF

66

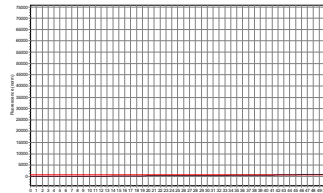

Threat: 657 (NonMatch)  
Baseline settings: automatic, DfH correction OFF

67

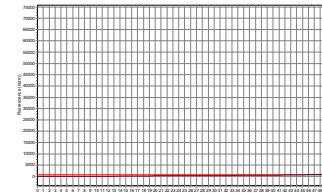

Threat: 657 (NonMatch)  
Baseline settings: automatic, DfH correction OFF

68

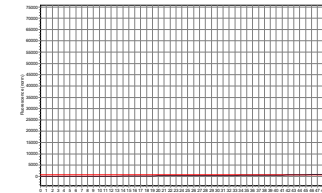

Threat: 657 (NonMatch)  
Baseline settings: automatic, DfH correction OFF

69

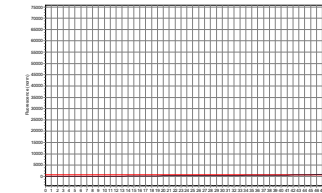

Threat: 657 (NonMatch)  
Baseline settings: automatic, DfH correction OFF

70

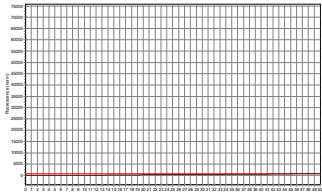

Threat: 657 (NonMatch)  
Baseline settings: automatic, DfH correction OFF

71

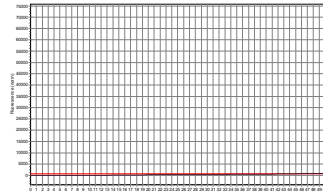

Threat: 657 (NonMatch)  
Baseline settings: automatic, DfH correction OFF

72

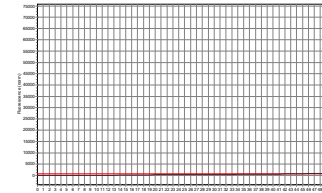

Threat: 657 (NonMatch)  
Baseline settings: automatic, DfH correction OFF

73

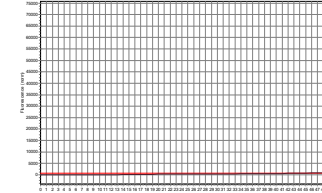

Threat: 657 (NonMatch)  
Baseline settings: automatic, DfH correction OFF

74

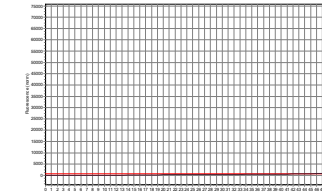

Threat: 657 (NonMatch)  
Baseline settings: automatic, DfH correction OFF

75

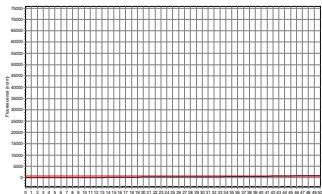

Threat: 657 (NonMatch)  
Baseline settings: automatic, DfH correction OFF

76

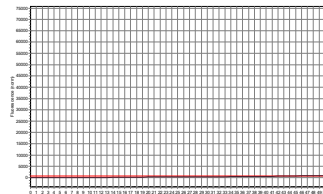

Threat: 657 (NonMatch)  
Baseline settings: automatic, DfH correction OFF

77

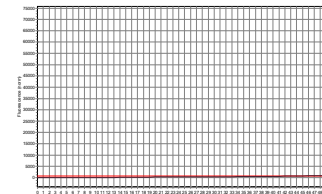

Threat: 657 (NonMatch)  
Baseline settings: automatic, DfH correction OFF

78

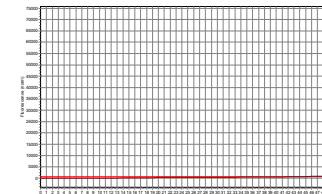

Threat: 657 (NonMatch)  
Baseline settings: automatic, DfH correction OFF

79

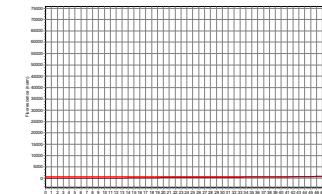

Threat: 657 (NonMatch)  
Baseline settings: automatic, DfH correction OFF

80

# TRMT11-GRIK2-PROSTATE-BLOOD SAMPLE 81-100

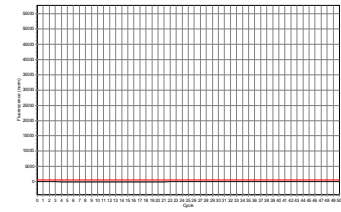

Threshold: 487 (Noisefloor)  
Baseline settings: automatic, Drift correction OFF

81

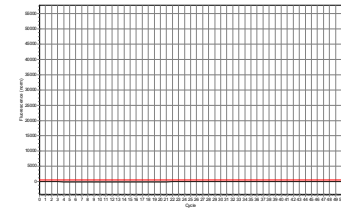

Threshold: 487 (Noisefloor)  
Baseline settings: automatic, Drift correction OFF

82

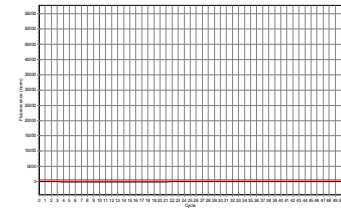

Threshold: 487 (Noisefloor)  
Baseline settings: automatic, Drift correction OFF

83

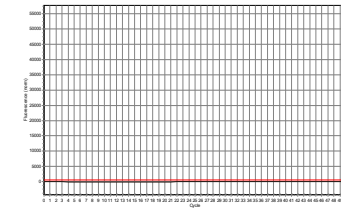

Threshold: 487 (Noisefloor)  
Baseline settings: automatic, Drift correction OFF

84

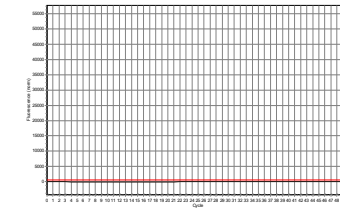

Threshold: 487 (Noisefloor)  
Baseline settings: automatic, Drift correction OFF

85

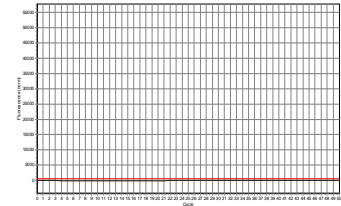

Threshold: 487 (Noisefloor)  
Baseline settings: automatic, Drift correction OFF

86

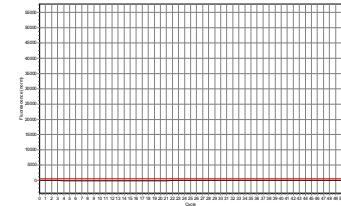

Threshold: 487 (Noisefloor)  
Baseline settings: automatic, Drift correction OFF

87

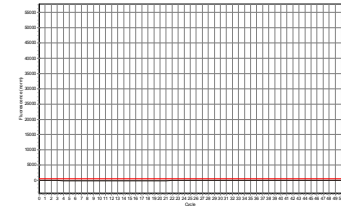

Threshold: 487 (Noisefloor)  
Baseline settings: automatic, Drift correction OFF

88

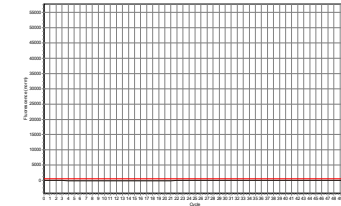

Threshold: 487 (Noisefloor)  
Baseline settings: automatic, Drift correction OFF

89

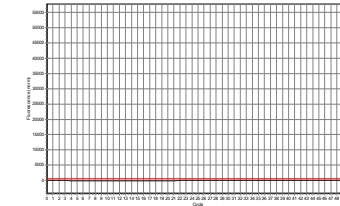

Threshold: 487 (Noisefloor)  
Baseline settings: automatic, Drift correction OFF

90

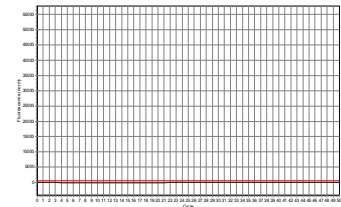

Threshold: 487 (Noisefloor)  
Baseline settings: automatic, Drift correction OFF

91

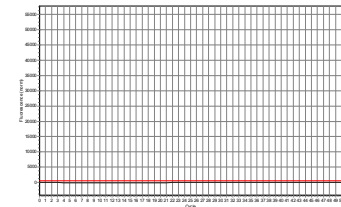

Threshold: 487 (Noisefloor)  
Baseline settings: automatic, Drift correction OFF

92

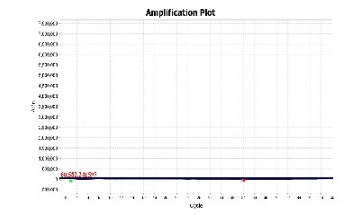

93

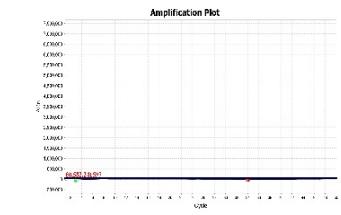

94

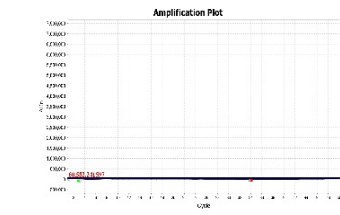

95

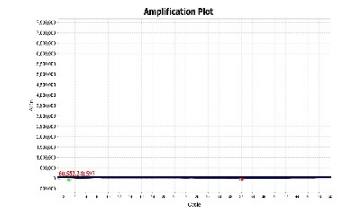

■  $10^1$

96

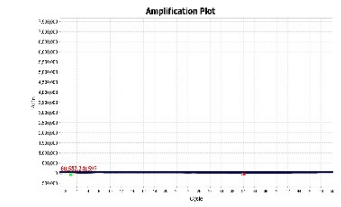

■  $10^1$

97



98

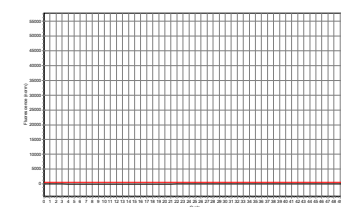

Threshold: 487 (Noisefloor)  
Baseline settings: automatic, Drift correction OFF

99

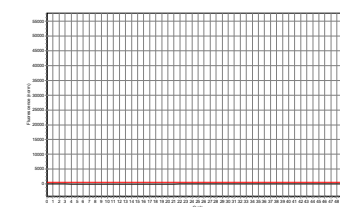

Threshold: 487 (Noisefloor)  
Baseline settings: automatic, Drift correction OFF

100

# TRMT11-GRIK2-PROSTATE-BLOOD SAMPLE 101-120

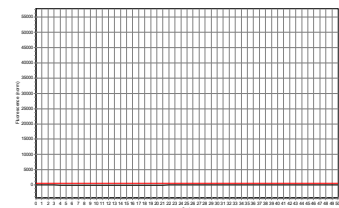

Threshold: 487 (Nonstandard)  
Baseline settings: automatic, Drift correction: OFF

101

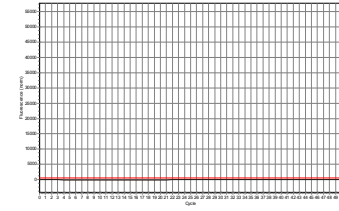

Threshold: 487 (Nonstandard)  
Baseline settings: automatic, Drift correction: OFF

102

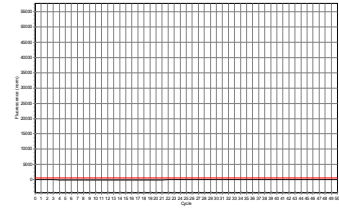

Threshold: 487 (Nonstandard)  
Baseline settings: automatic, Drift correction: OFF

103

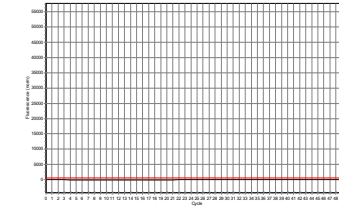

Threshold: 487 (Nonstandard)  
Baseline settings: automatic, Drift correction: OFF

104

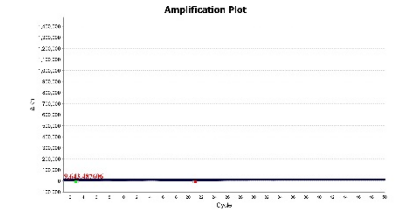

Target 1

105

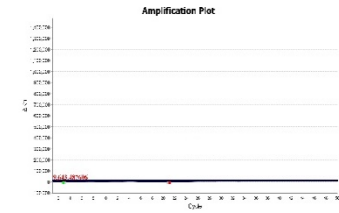

Target 1

106

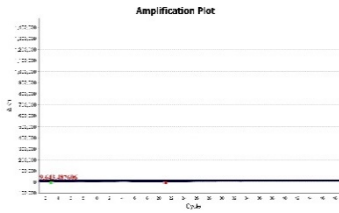

Target 1

107

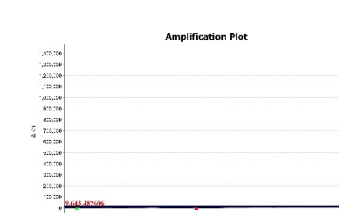

Target 1

108

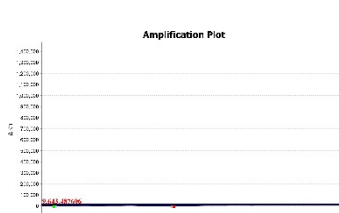

Target 1

109

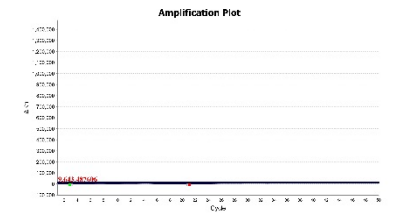

Target 1

110

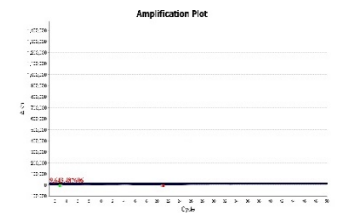

Target 1

111

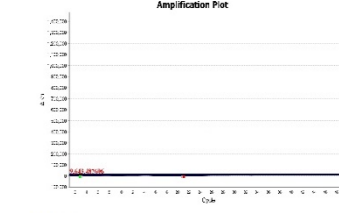

Target 1

111

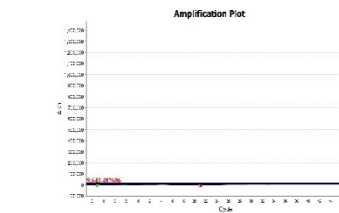

Target 1

113

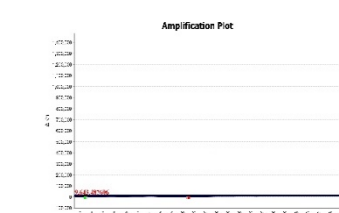

Target 1

114

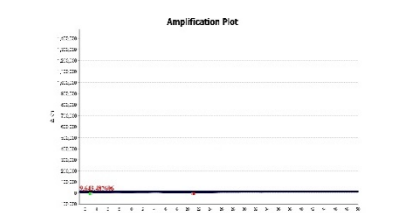

Target 1

115

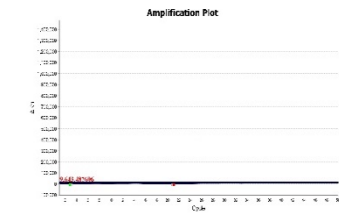

Target 1

116

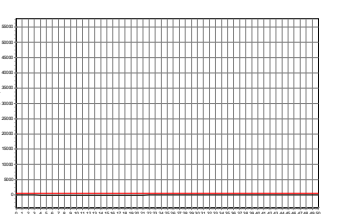

Threshold: 487 (Nonstandard)  
Baseline settings: automatic, Drift correction: OFF

117

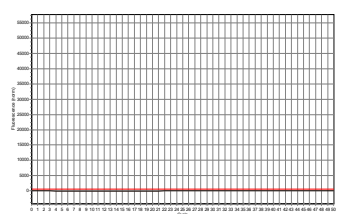

Threshold: 487 (Nonstandard)  
Baseline settings: automatic, Drift correction: OFF

118

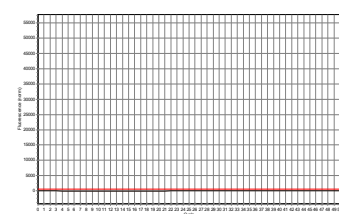

Threshold: 487 (Nonstandard)  
Baseline settings: automatic, Drift correction: OFF

119

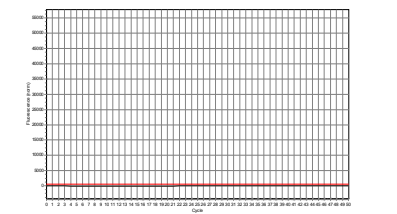

Threshold: 487 (Nonstandard)  
Baseline settings: automatic, Drift correction: OFF

120





# TRMT11-GRIK2-PROSTATE-BLOOD SAMPLE 141-150

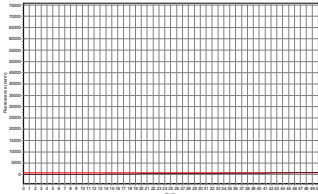

Threshold: 657 (Normal)  
Baseline settings: automatic, Dtk correction OFF

141

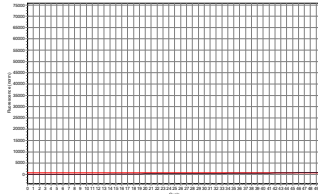

Threshold: 657 (Normal)  
Baseline settings: automatic, Dtk correction OFF

142

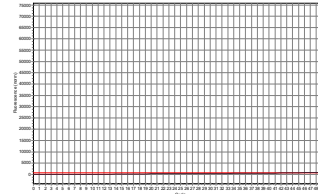

Threshold: 657 (Normal)  
Baseline settings: automatic, Dtk correction OFF

143

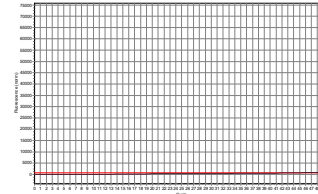

Threshold: 657 (Normal)  
Baseline settings: automatic, Dtk correction OFF

144

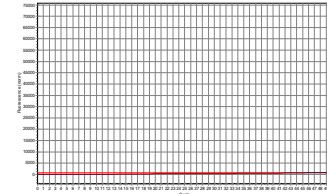

Threshold: 657 (Normal)  
Baseline settings: automatic, Dtk correction OFF

145

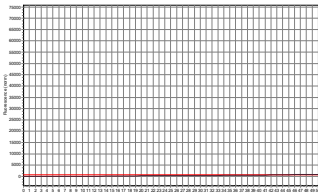

Threshold: 657 (Normal)  
Baseline settings: automatic, Dtk correction OFF

146

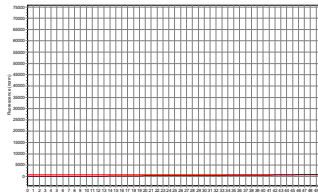

Threshold: 657 (Normal)  
Baseline settings: automatic, Dtk correction OFF

147

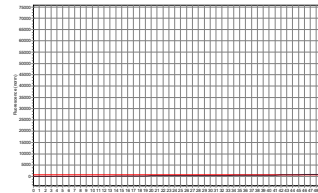

Threshold: 657 (Normal)  
Baseline settings: automatic, Dtk correction OFF

148

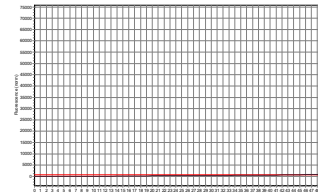

Threshold: 657 (Normal)  
Baseline settings: automatic, Dtk correction OFF

149

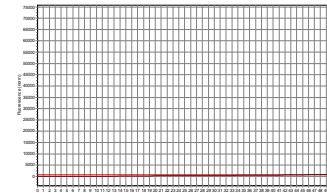

Threshold: 657 (Normal)  
Baseline settings: automatic, Dtk correction OFF

150

# Supplemental figure 3

## mTOR-TP53BP1 fusion detection mTOR-TP53BP1-PROSTATE-BLOOD SAMPLE 1-20

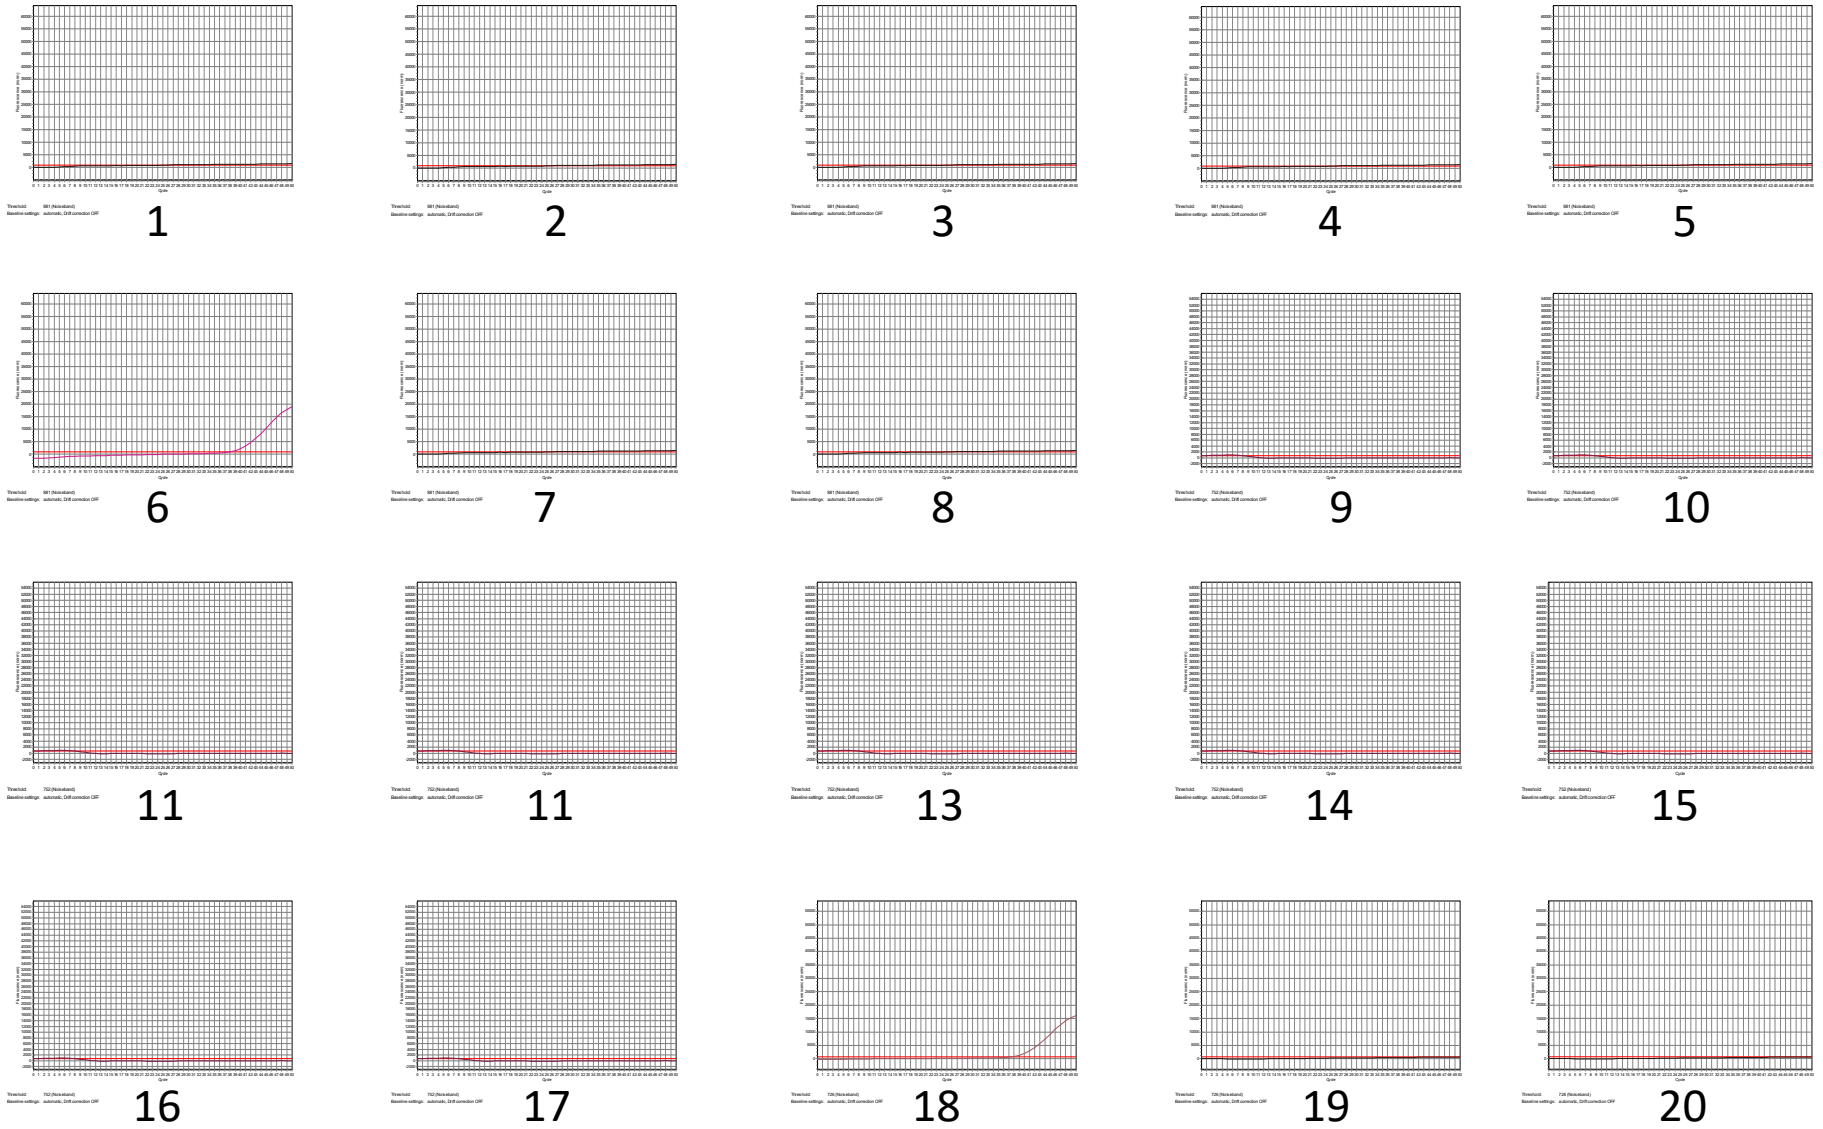

# mTOR-TP53BP1-PROSTATE-BLOOD SAMPLE 21-40

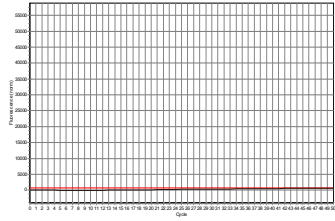

Threshold: T26 (Noisiband)  
Baseline settings: automatic, DR correction OFF

21

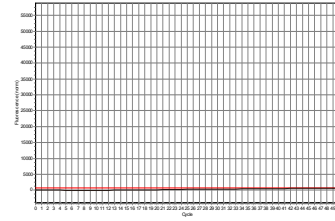

Threshold: T26 (Noisiband)  
Baseline settings: automatic, DR correction OFF

22

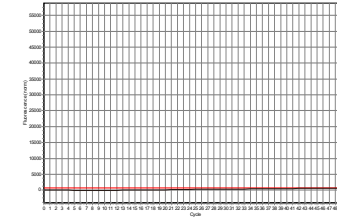

Threshold: T26 (Noisiband)  
Baseline settings: automatic, DR correction OFF

23

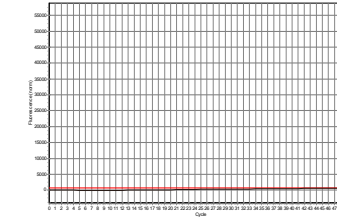

Threshold: T26 (Noisiband)  
Baseline settings: automatic, DR correction OFF

24

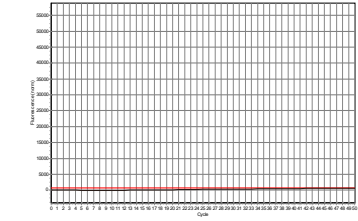

Threshold: T26 (Noisiband)  
Baseline settings: automatic, DR correction OFF

25

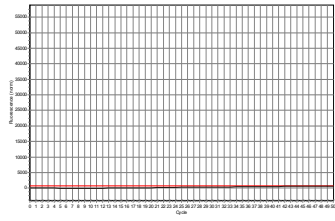

Threshold: T26 (Noisiband)  
Baseline settings: automatic, DR correction OFF

26

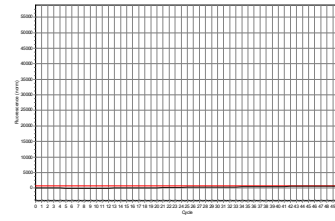

Threshold: T26 (Noisiband)  
Baseline settings: automatic, DR correction OFF

27

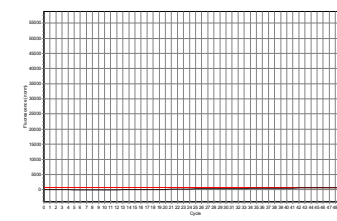

Threshold: T26 (Noisiband)  
Baseline settings: automatic, DR correction OFF

28

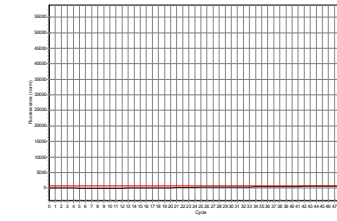

Threshold: T26 (Noisiband)  
Baseline settings: automatic, DR correction OFF

29

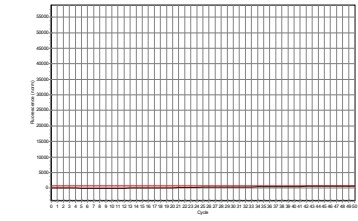

Threshold: T26 (Noisiband)  
Baseline settings: automatic, DR correction OFF

30

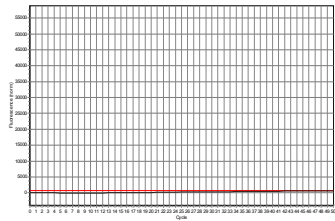

Threshold: T26 (Noisiband)  
Baseline settings: automatic, DR correction OFF

31

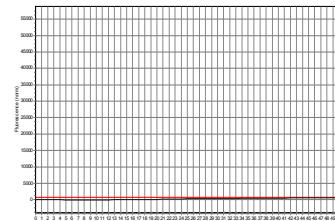

Threshold: T26 (Noisiband)  
Baseline settings: automatic, DR correction OFF

32

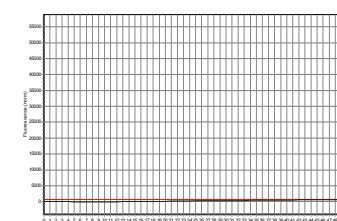

Threshold: T26 (Noisiband)  
Baseline settings: automatic, DR correction OFF

33

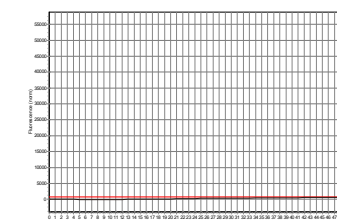

Threshold: T26 (Noisiband)  
Baseline settings: automatic, DR correction OFF

34

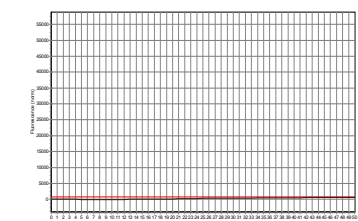

Threshold: T26 (Noisiband)  
Baseline settings: automatic, DR correction OFF

35

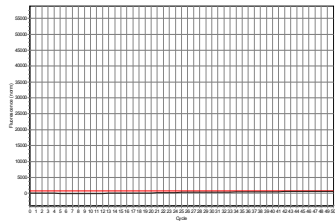

Threshold: T26 (Noisiband)  
Baseline settings: automatic, DR correction OFF

36

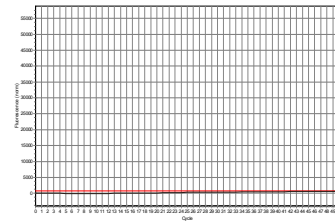

Threshold: T26 (Noisiband)  
Baseline settings: automatic, DR correction OFF

37

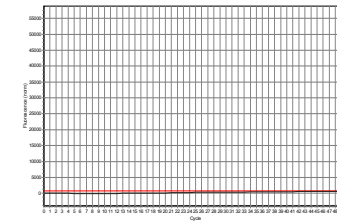

Threshold: T26 (Noisiband)  
Baseline settings: automatic, DR correction OFF

38

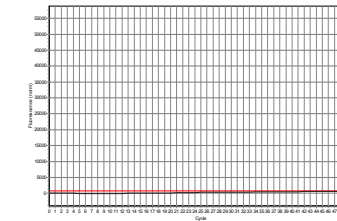

Threshold: T26 (Noisiband)  
Baseline settings: automatic, DR correction OFF

39

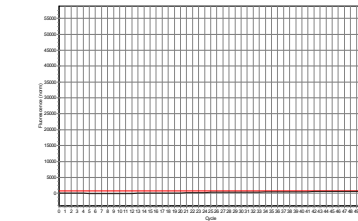

Threshold: T26 (Noisiband)  
Baseline settings: automatic, DR correction OFF

40

# mTOR-TP53BP1-PROSTATE-BLOOD SAMPLE 41-60

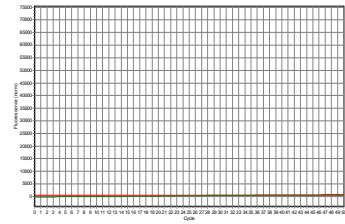

Threshold: 432 (Noisband)  
Baseline settings: automatic, DfH correction OFF

41

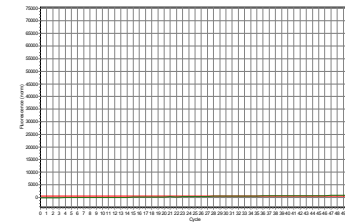

Threshold: 432 (Noisband)  
Baseline settings: automatic, DfH correction OFF

42

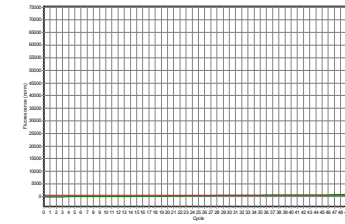

Threshold: 432 (Noisband)  
Baseline settings: automatic, DfH correction OFF

43

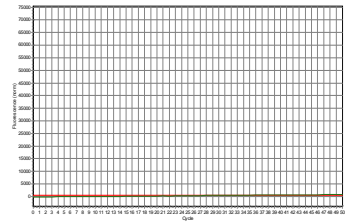

Threshold: 432 (Noisband)  
Baseline settings: automatic, DfH correction OFF

44

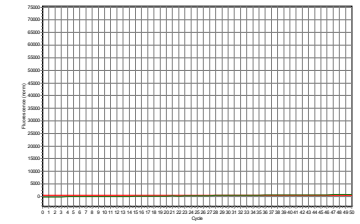

Threshold: 432 (Noisband)  
Baseline settings: automatic, DfH correction OFF

45

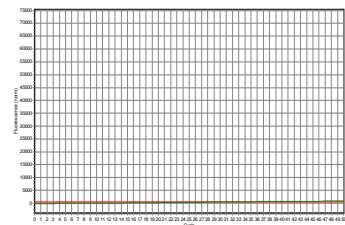

Threshold: 432 (Noisband)  
Baseline settings: automatic, DfH correction OFF

46

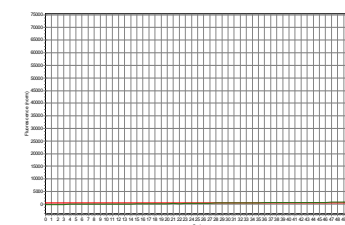

Threshold: 432 (Noisband)  
Baseline settings: automatic, DfH correction OFF

47

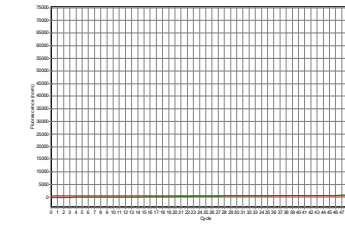

Threshold: 432 (Noisband)  
Baseline settings: automatic, DfH correction OFF

49

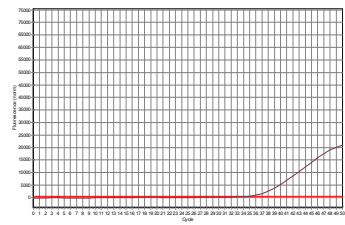

Threshold: 432 (Noisband)  
Baseline settings: automatic, DfH correction OFF

50

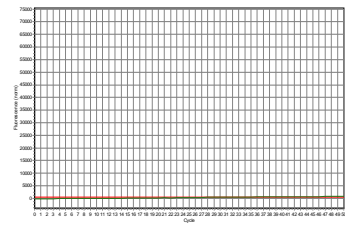

Threshold: 432 (Noisband)  
Baseline settings: automatic, DfH correction OFF

51

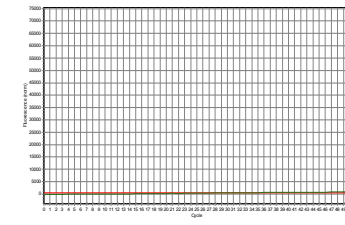

Threshold: 432 (Noisband)  
Baseline settings: automatic, DfH correction OFF

52

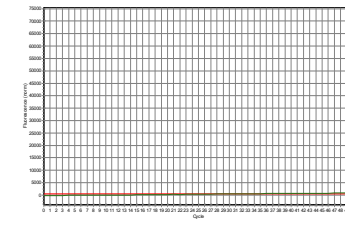

Threshold: 432 (Noisband)  
Baseline settings: automatic, DfH correction OFF

53

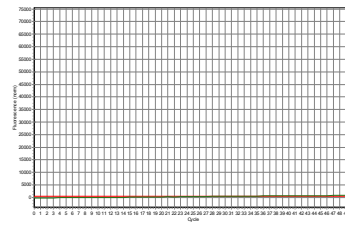

Threshold: 432 (Noisband)  
Baseline settings: automatic, DfH correction OFF

54

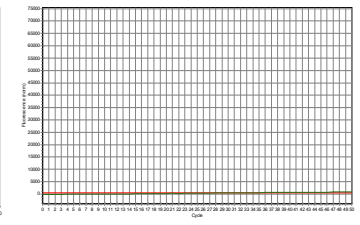

Threshold: 432 (Noisband)  
Baseline settings: automatic, DfH correction OFF

55

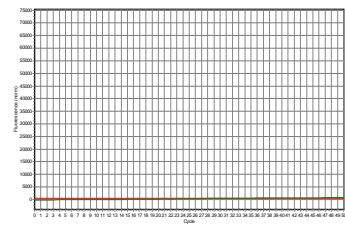

Threshold: 432 (Noisband)  
Baseline settings: automatic, DfH correction OFF

56

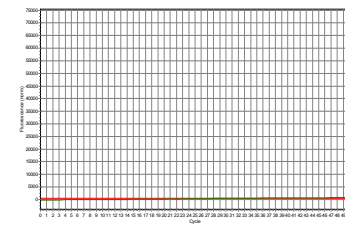

Threshold: 432 (Noisband)  
Baseline settings: automatic, DfH correction OFF

57

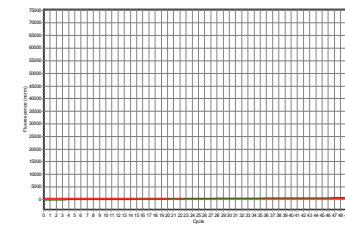

Threshold: 432 (Noisband)  
Baseline settings: automatic, DfH correction OFF

58

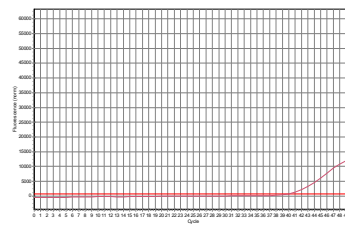

Threshold: 759 (Noisband)  
Baseline settings: automatic, DfH correction OFF

59

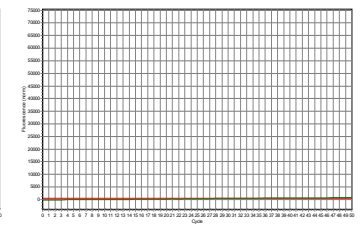

Threshold: 432 (Noisband)  
Baseline settings: automatic, DfH correction OFF

60

# mTOR-TP53BP1-PROSTATE-BLOOD SAMPLE 61-80

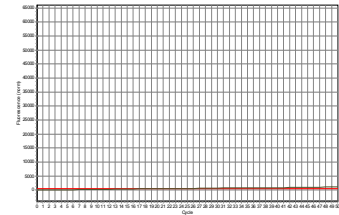

Threshold: 516 (Noiseband)  
Baseline settings: automatic, DR correction OFF

61

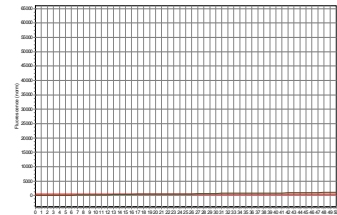

Threshold: 516 (Noiseband)  
Baseline settings: automatic, DR correction OFF

62

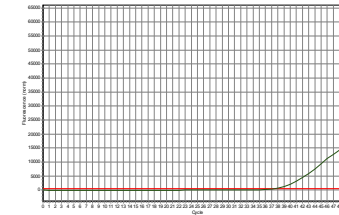

Threshold: 516 (Noiseband)  
Baseline settings: automatic, DR correction OFF

63

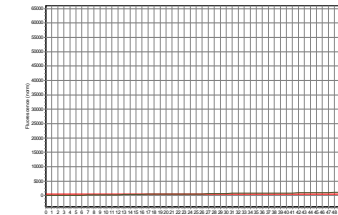

Threshold: 516 (Noiseband)  
Baseline settings: automatic, DR correction OFF

64

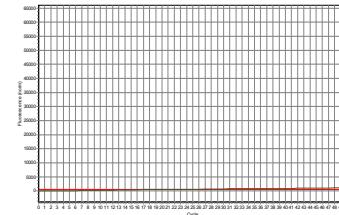

Threshold: 516 (Noiseband)  
Baseline settings: automatic, DR correction OFF

65

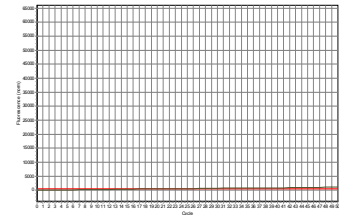

Threshold: 516 (Noiseband)  
Baseline settings: automatic, DR correction OFF

66

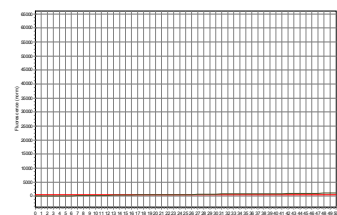

Threshold: 516 (Noiseband)  
Baseline settings: automatic, DR correction OFF

67

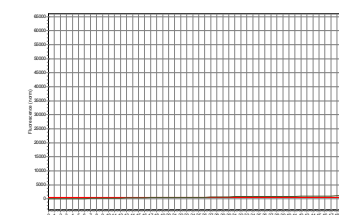

Threshold: 516 (Noiseband)  
Baseline settings: automatic, DR correction OFF

68

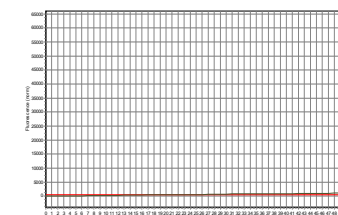

Threshold: 516 (Noiseband)  
Baseline settings: automatic, DR correction OFF

69

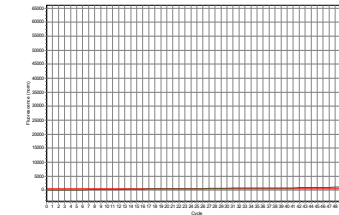

Threshold: 516 (Noiseband)  
Baseline settings: automatic, DR correction OFF

70

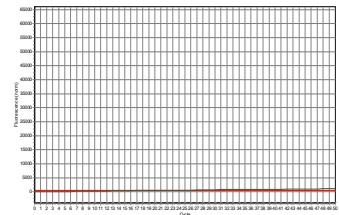

Threshold: 516 (Noiseband)  
Baseline settings: automatic, DR correction OFF

71

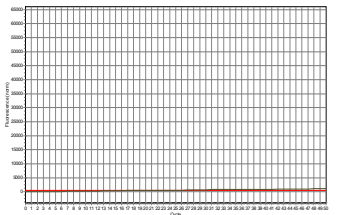

Threshold: 516 (Noiseband)  
Baseline settings: automatic, DR correction OFF

72

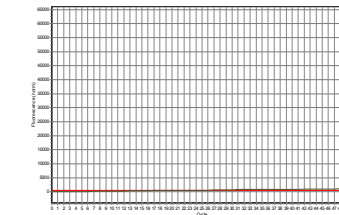

Threshold: 516 (Noiseband)  
Baseline settings: automatic, DR correction OFF

73

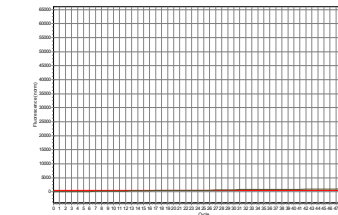

Threshold: 516 (Noiseband)  
Baseline settings: automatic, DR correction OFF

74

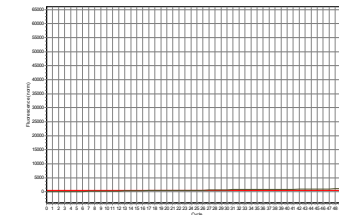

Threshold: 516 (Noiseband)  
Baseline settings: automatic, DR correction OFF

75

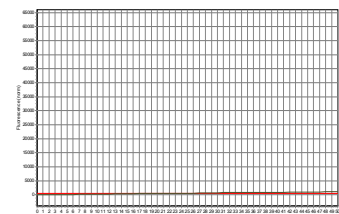

Threshold: 516 (Noiseband)  
Baseline settings: automatic, DR correction OFF

76

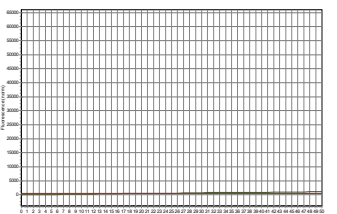

Threshold: 516 (Noiseband)  
Baseline settings: automatic, DR correction OFF

77

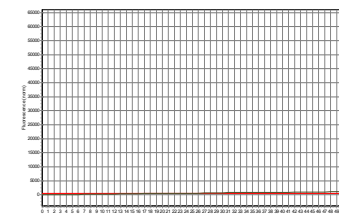

Threshold: 516 (Noiseband)  
Baseline settings: automatic, DR correction OFF

78

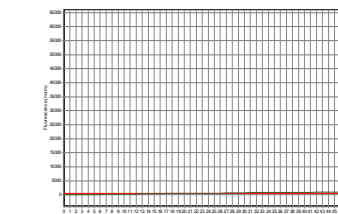

Threshold: 516 (Noiseband)  
Baseline settings: automatic, DR correction OFF

79

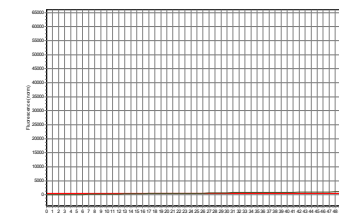

Threshold: 516 (Noiseband)  
Baseline settings: automatic, DR correction OFF

80

# mTOR-TP53BP1-PROSTATE-BLOOD SAMPLE 81-100

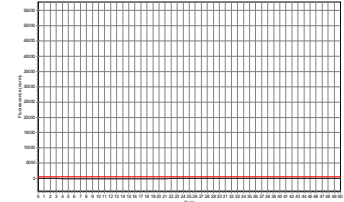

Threshold: 487 (Noisefloor)  
Baseline settings: automatic, Drift correction OFF

81

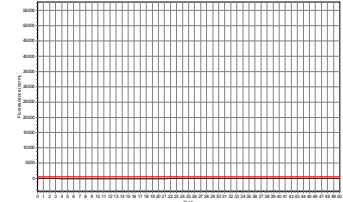

Threshold: 487 (Noisefloor)  
Baseline settings: automatic, Drift correction OFF

82

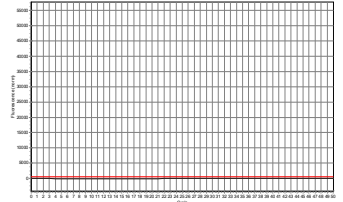

Threshold: 487 (Noisefloor)  
Baseline settings: automatic, Drift correction OFF

83

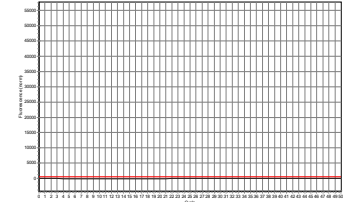

Threshold: 487 (Noisefloor)  
Baseline settings: automatic, Drift correction OFF

84

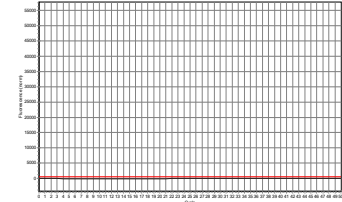

Threshold: 487 (Noisefloor)  
Baseline settings: automatic, Drift correction OFF

85

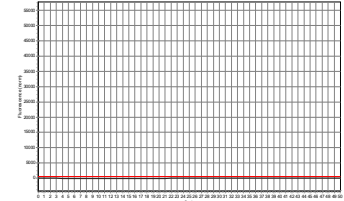

Threshold: 487 (Noisefloor)  
Baseline settings: automatic, Drift correction OFF

86

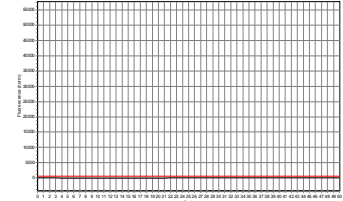

Threshold: 487 (Noisefloor)  
Baseline settings: automatic, Drift correction OFF

87

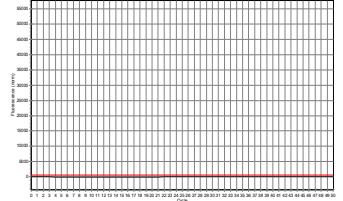

Threshold: 487 (Noisefloor)  
Baseline settings: automatic, Drift correction OFF

88

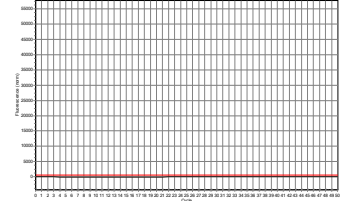

Threshold: 487 (Noisefloor)  
Baseline settings: automatic, Drift correction OFF

89

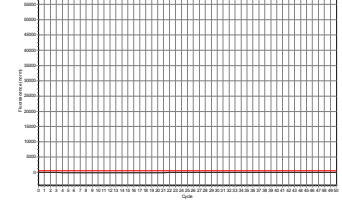

Threshold: 487 (Noisefloor)  
Baseline settings: automatic, Drift correction OFF

90

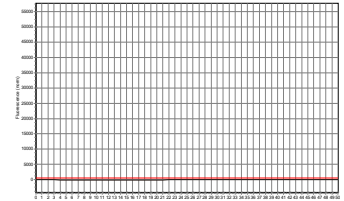

Threshold: 487 (Noisefloor)  
Baseline settings: automatic, Drift correction OFF

91

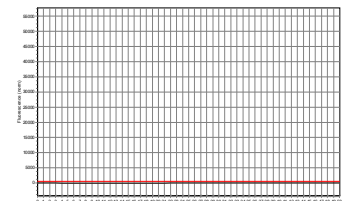

Threshold: 487 (Noisefloor)  
Baseline settings: automatic, Drift correction OFF

92

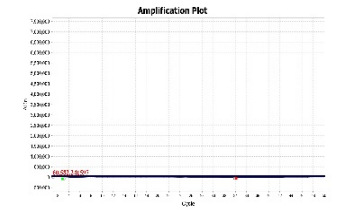

93

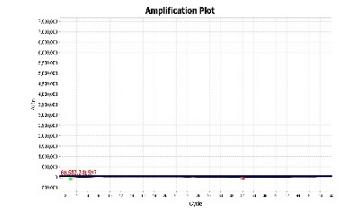

94

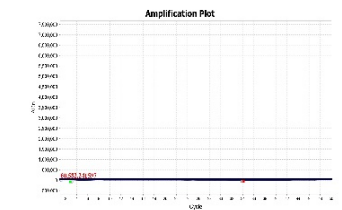

95

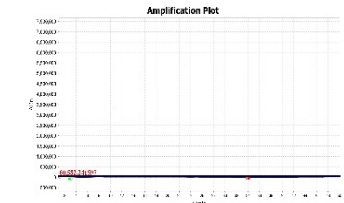

96

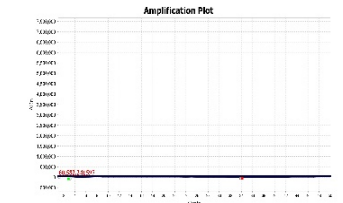

97

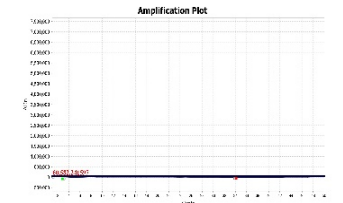

98

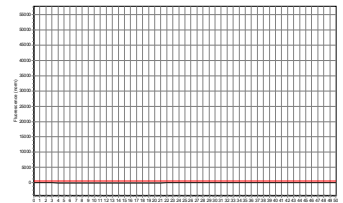

Threshold: 487 (Noisefloor)  
Baseline settings: automatic, Drift correction OFF

99

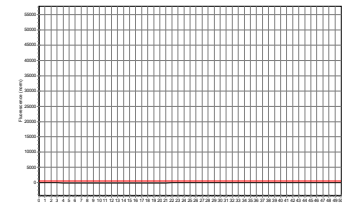

Threshold: 487 (Noisefloor)  
Baseline settings: automatic, Drift correction OFF

100

# mTOR-TP53BP1-PROSTATE-BLOOD SAMPLE 101-120

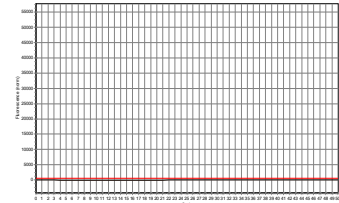

Threshold: 487 (Nonstandard)  
Baseline settings: automatic, DR correction OFF

101

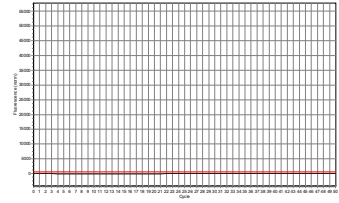

Threshold: 487 (Nonstandard)  
Baseline settings: automatic, DR correction OFF

102

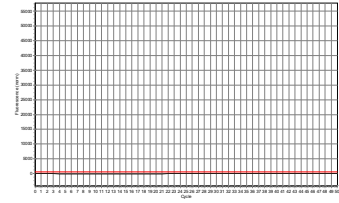

Threshold: 487 (Nonstandard)  
Baseline settings: automatic, DR correction OFF

103

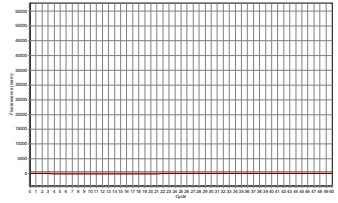

Threshold: 487 (Nonstandard)  
Baseline settings: automatic, DR correction OFF

104

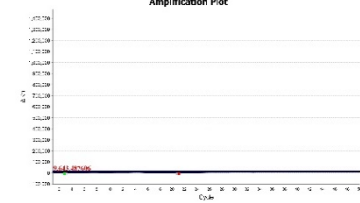

Threshold: 487 (Nonstandard)  
Baseline settings: automatic, DR correction OFF

105

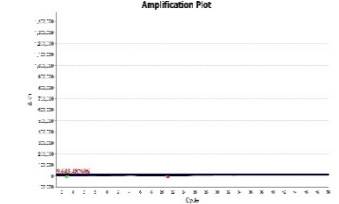

Target 1

106

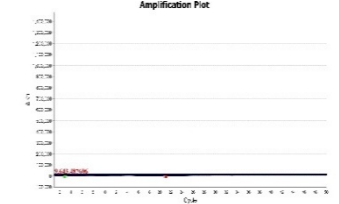

Target 1

107

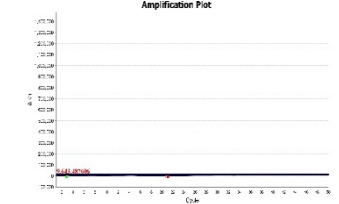

Target 1

108

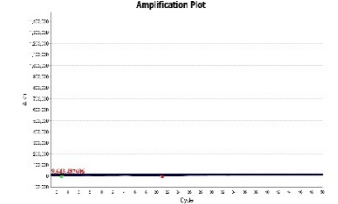

Target 1

109

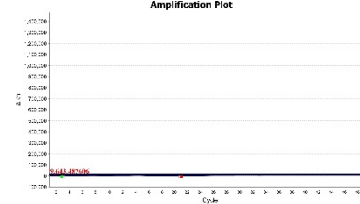

Target 1

110

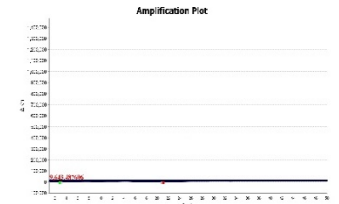

Target 1

111

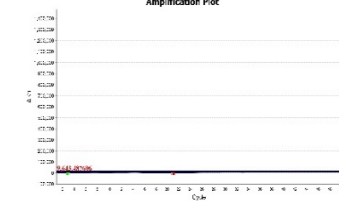

Target 1

111

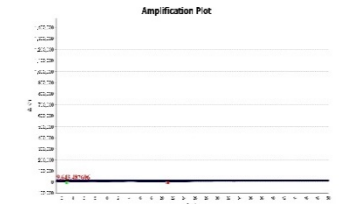

Target 1

113

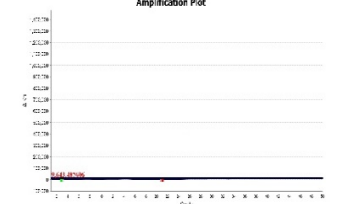

Target 1

114

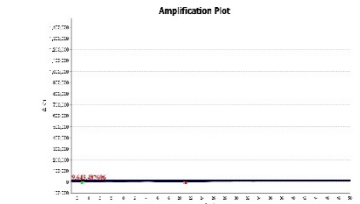

Target 1

115

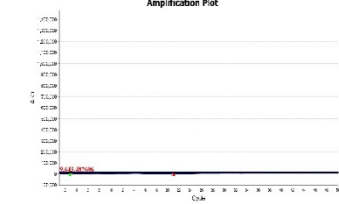

Target 1

116

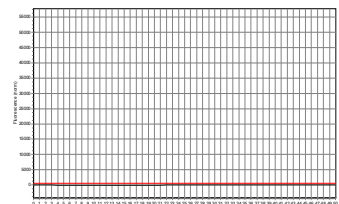

Threshold: 487 (Nonstandard)  
Baseline settings: automatic, DR correction OFF

117

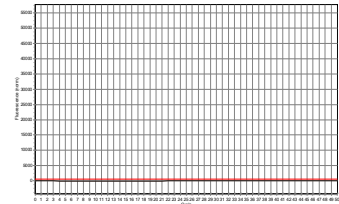

Threshold: 487 (Nonstandard)  
Baseline settings: automatic, DR correction OFF

118

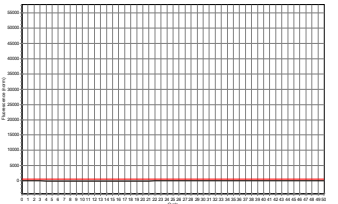

Threshold: 487 (Nonstandard)  
Baseline settings: automatic, DR correction OFF

119

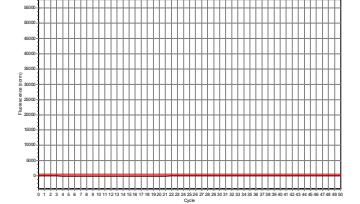

Threshold: 487 (Nonstandard)  
Baseline settings: automatic, DR correction OFF

120



# mTOR-TP53BP1-PROSTATE-BLOOD SAMPLE 121-140

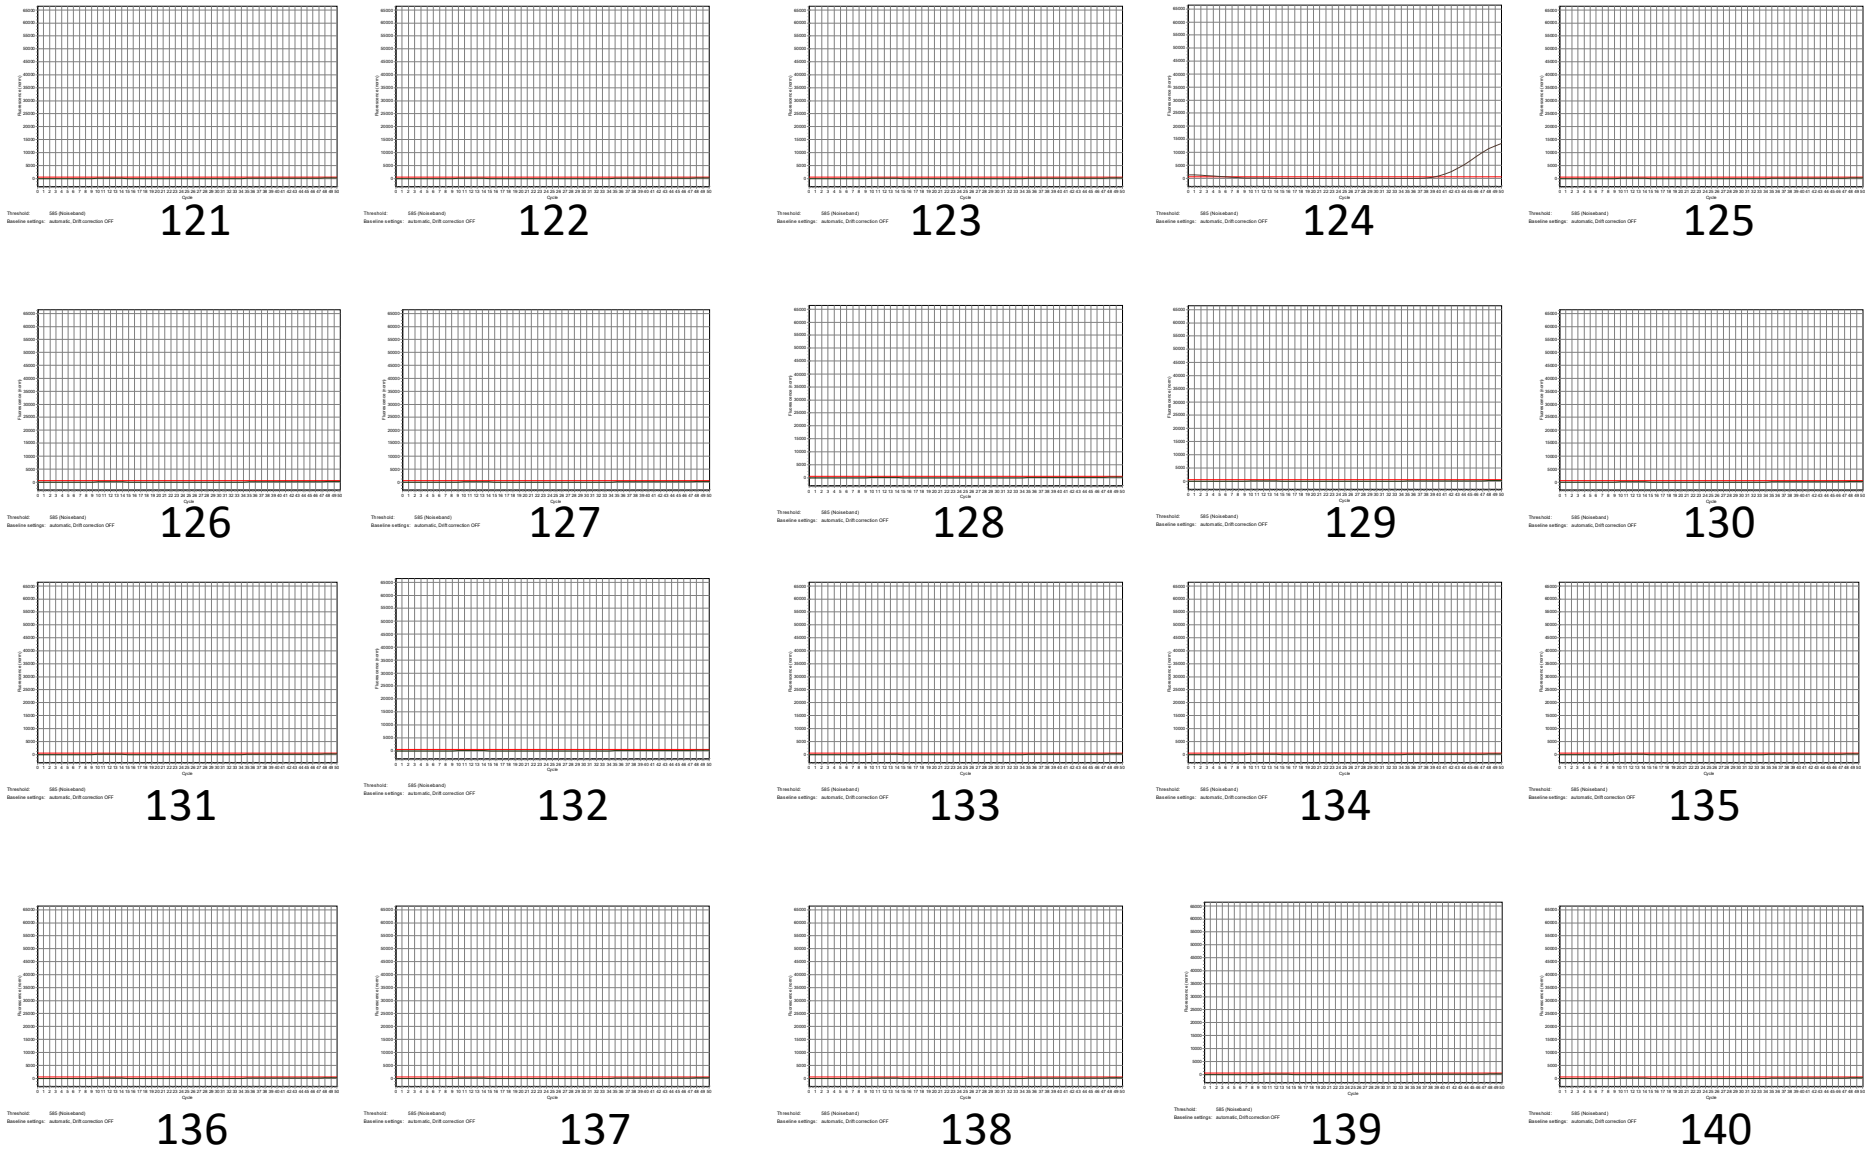

# mTOR-TP53BP1-PROSTATE-BLOOD SAMPLE 141-150

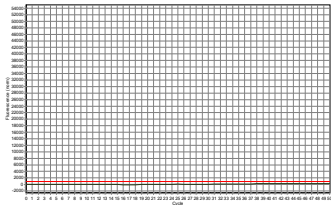

Threshold: 656 (Adjusted manually)  
Baseline settings: automatic, Diff correction: OFF

141

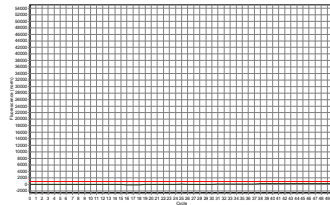

Threshold: 656 (Adjusted manually)  
Baseline settings: automatic, Diff correction: OFF

142

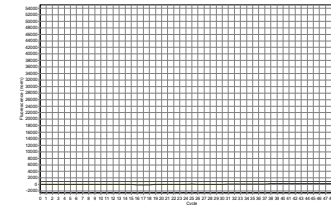

Threshold: 656 (Adjusted manually)  
Baseline settings: automatic, Diff correction: OFF

143

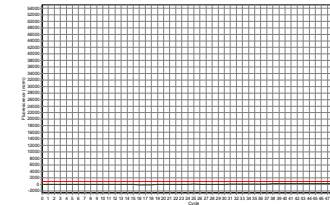

Threshold: 656 (Adjusted manually)  
Baseline settings: automatic, Diff correction: OFF

144

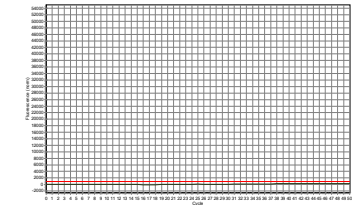

Threshold: 656 (Adjusted manually)  
Baseline settings: automatic, Diff correction: OFF

145

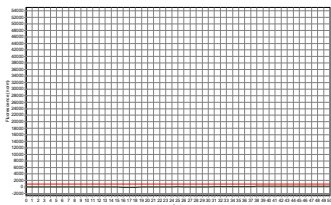

Threshold: 656 (Adjusted manually)  
Baseline settings: automatic, Diff correction: OFF

146

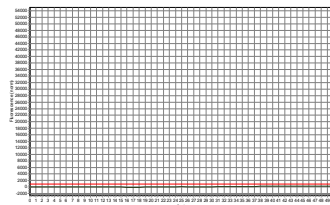

Threshold: 656 (Adjusted manually)  
Baseline settings: automatic, Diff correction: OFF

147

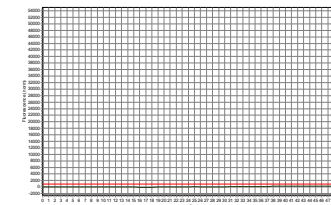

Threshold: 656 (Adjusted manually)  
Baseline settings: automatic, Diff correction: OFF

148

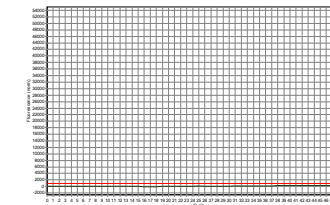

Threshold: 656 (Adjusted manually)  
Baseline settings: automatic, Diff correction: OFF

149

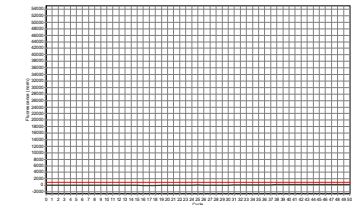

Threshold: 656 (Adjusted manually)  
Baseline settings: automatic, Diff correction: OFF

150

# Supplemental figure 4

## CCNH-c5orf30 fusion detection CCNH-c5orf30-PROSTATE-BLOOD SAMPLE 1-20

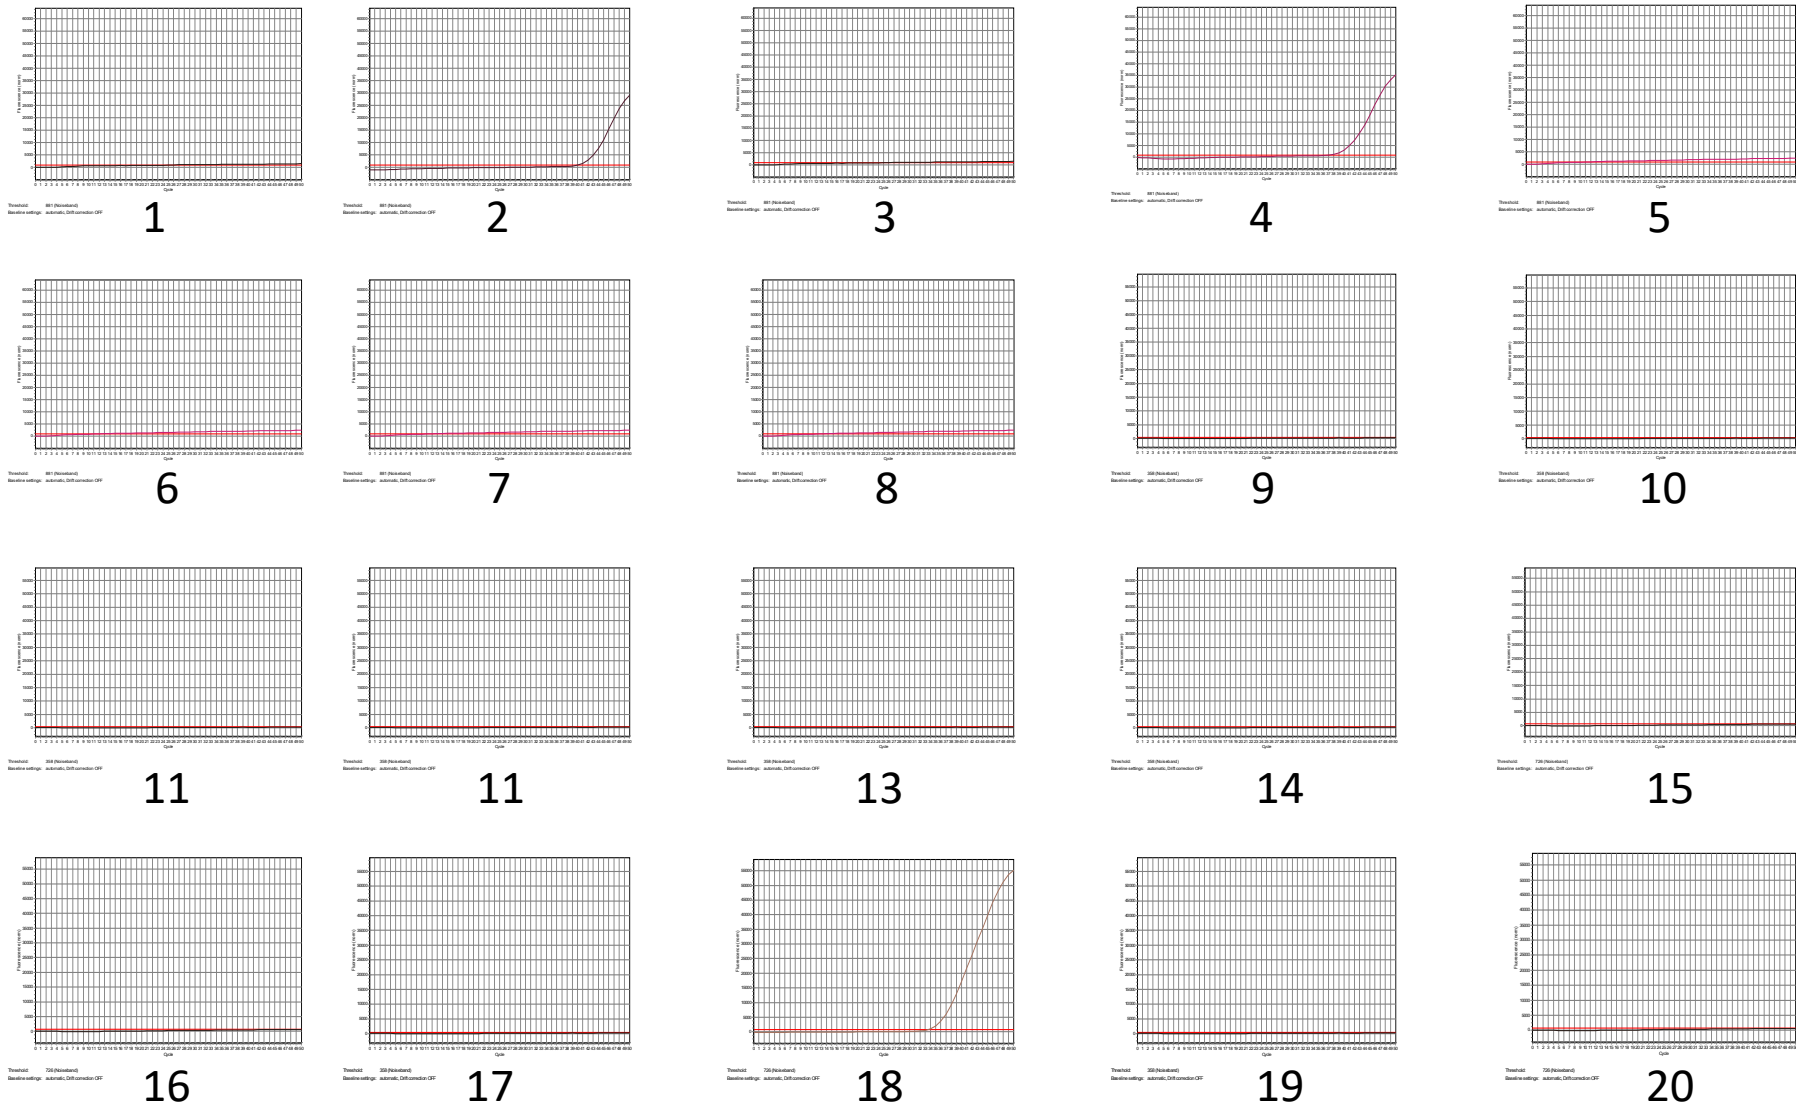

# CCNH-c5orf30-PROSTATE-BLOOD SAMPLE 21-40

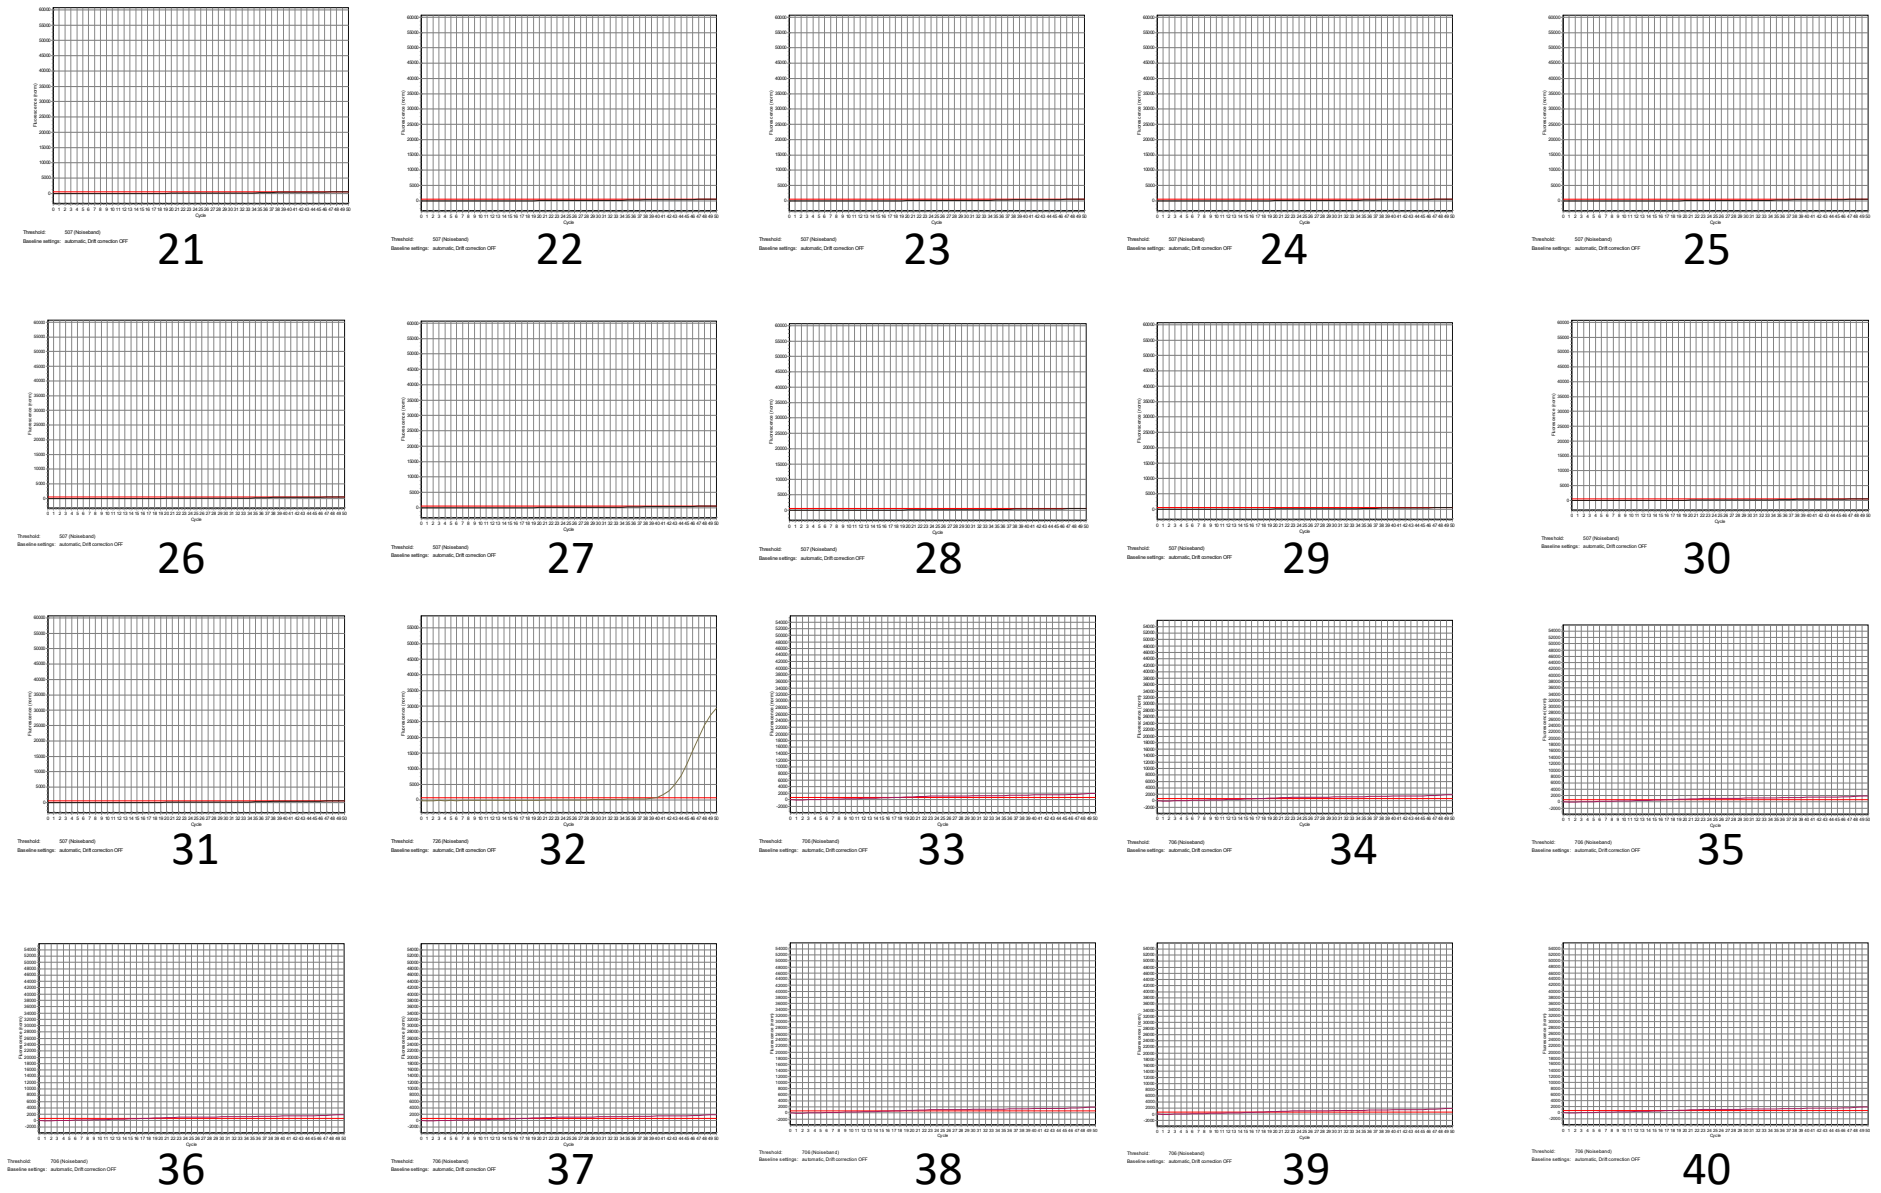

# CCNH-c5orf30-PROSTATE-BLOOD SAMPLE 41-60

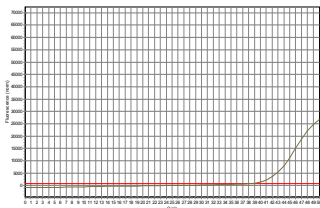

Threshold: 701 (Nonstandard)  
Baseline settings: automatic, DR correction OFF

41

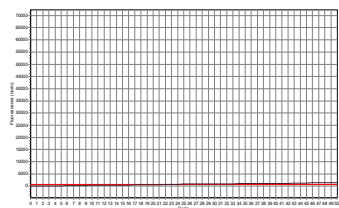

Threshold: 701 (Nonstandard)  
Baseline settings: automatic, DR correction OFF

42

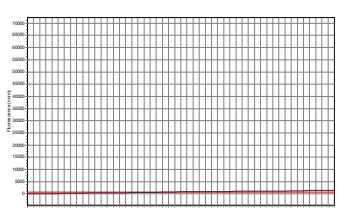

Threshold: 701 (Nonstandard)  
Baseline settings: automatic, DR correction OFF

43

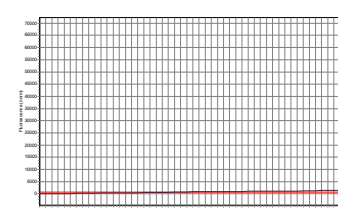

Threshold: 701 (Nonstandard)  
Baseline settings: automatic, DR correction OFF

44

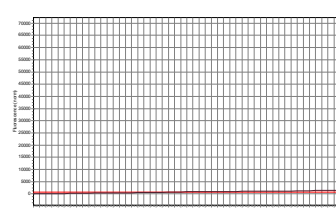

Threshold: 701 (Nonstandard)  
Baseline settings: automatic, DR correction OFF

45

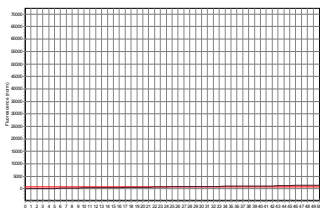

Threshold: 701 (Nonstandard)  
Baseline settings: automatic, DR correction OFF

46

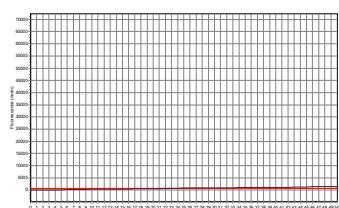

Threshold: 701 (Nonstandard)  
Baseline settings: automatic, DR correction OFF

47

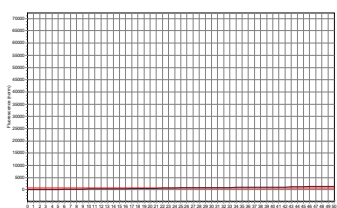

Threshold: 701 (Nonstandard)  
Baseline settings: automatic, DR correction OFF

47

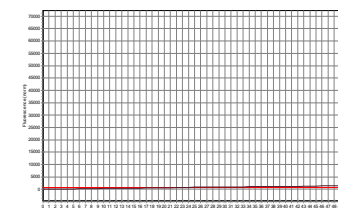

Threshold: 701 (Nonstandard)  
Baseline settings: automatic, DR correction OFF

49

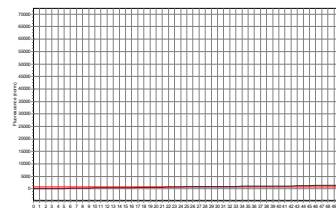

Threshold: 701 (Nonstandard)  
Baseline settings: automatic, DR correction OFF

50

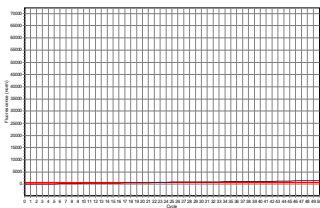

Threshold: 701 (Nonstandard)  
Baseline settings: automatic, DR correction OFF

51

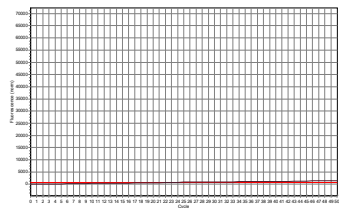

Threshold: 701 (Nonstandard)  
Baseline settings: automatic, DR correction OFF

52

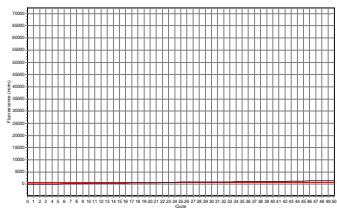

Threshold: 701 (Nonstandard)  
Baseline settings: automatic, DR correction OFF

53

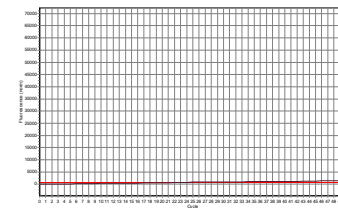

Threshold: 701 (Nonstandard)  
Baseline settings: automatic, DR correction OFF

54

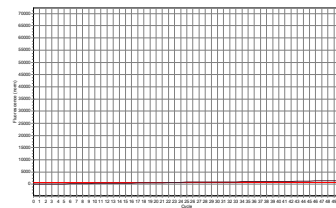

Threshold: 701 (Nonstandard)  
Baseline settings: automatic, DR correction OFF

55

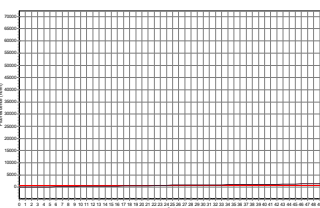

Threshold: 701 (Nonstandard)  
Baseline settings: automatic, DR correction OFF

56

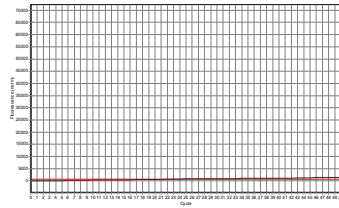

Threshold: 701 (Nonstandard)  
Baseline settings: automatic, DR correction OFF

57

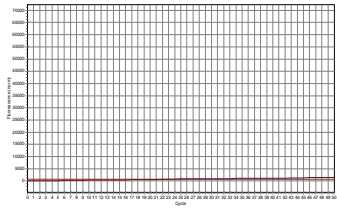

Threshold: 701 (Nonstandard)  
Baseline settings: automatic, DR correction OFF

58

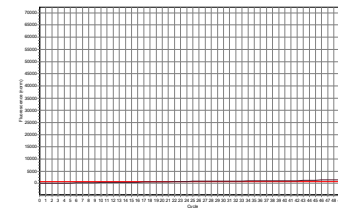

Threshold: 701 (Nonstandard)  
Baseline settings: automatic, DR correction OFF

59

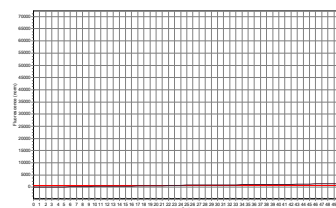

Threshold: 701 (Nonstandard)  
Baseline settings: automatic, DR correction OFF

60

# CCNH-c5orf30-PROSTATE-BLOOD SAMPLE 61-80

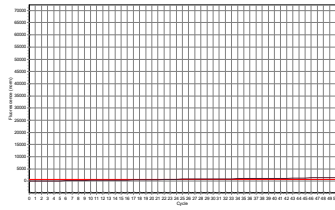

Threshold: 516 (Nonstandard)  
Baseline settings: automatic, DR correction OFF

61

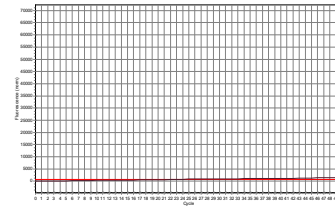

Threshold: 516 (Nonstandard)  
Baseline settings: automatic, DR correction OFF

62

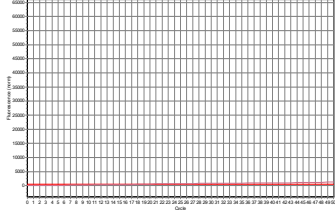

Threshold: 516 (Nonstandard)  
Baseline settings: automatic, DR correction OFF

63

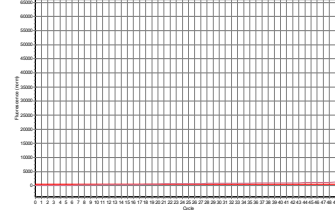

Threshold: 516 (Nonstandard)  
Baseline settings: automatic, DR correction OFF

64

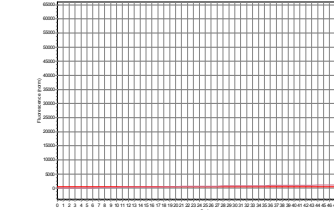

Threshold: 516 (Nonstandard)  
Baseline settings: automatic, DR correction OFF

65

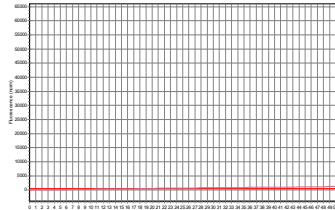

Threshold: 516 (Nonstandard)  
Baseline settings: automatic, DR correction OFF

66

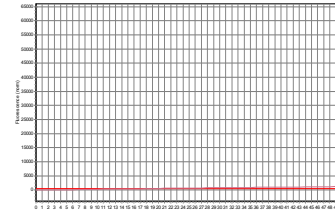

Threshold: 516 (Nonstandard)  
Baseline settings: automatic, DR correction OFF

67

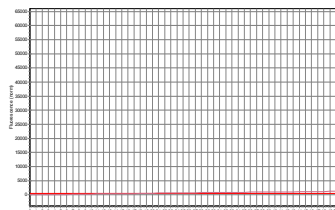

Threshold: 516 (Nonstandard)  
Baseline settings: automatic, DR correction OFF

68

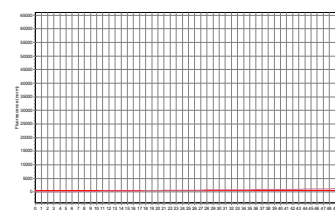

Threshold: 516 (Nonstandard)  
Baseline settings: automatic, DR correction OFF

69

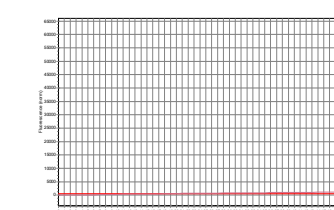

Threshold: 516 (Nonstandard)  
Baseline settings: automatic, DR correction OFF

70

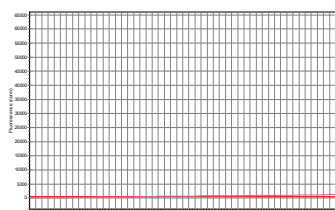

Threshold: 516 (Nonstandard)  
Baseline settings: automatic, DR correction OFF

71

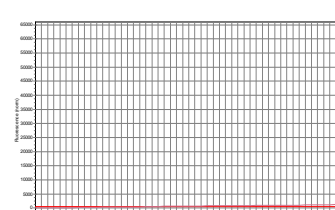

Threshold: 516 (Nonstandard)  
Baseline settings: automatic, DR correction OFF

72

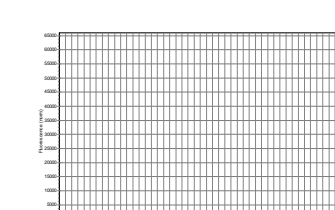

Threshold: 516 (Nonstandard)  
Baseline settings: automatic, DR correction OFF

73

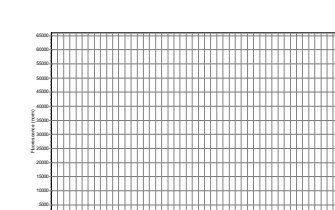

Threshold: 516 (Nonstandard)  
Baseline settings: automatic, DR correction OFF

74

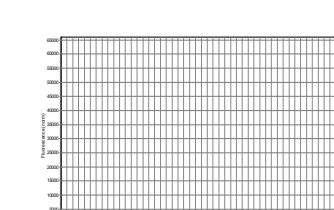

Threshold: 516 (Nonstandard)  
Baseline settings: automatic, DR correction OFF

75

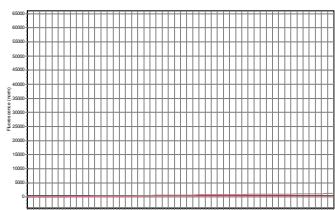

Threshold: 516 (Nonstandard)  
Baseline settings: automatic, DR correction OFF

76

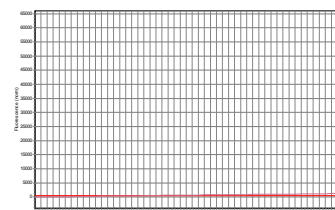

Threshold: 516 (Nonstandard)  
Baseline settings: automatic, DR correction OFF

77

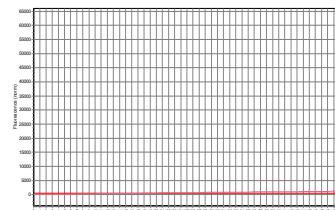

Threshold: 516 (Nonstandard)  
Baseline settings: automatic, DR correction OFF

78

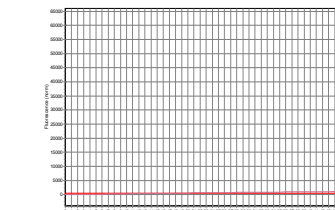

Threshold: 516 (Nonstandard)  
Baseline settings: automatic, DR correction OFF

79

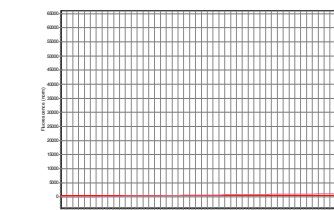

Threshold: 516 (Nonstandard)  
Baseline settings: automatic, DR correction OFF

80

# CCNH-c5orf30-PROSTATE-BLOOD SAMPLE 81-100

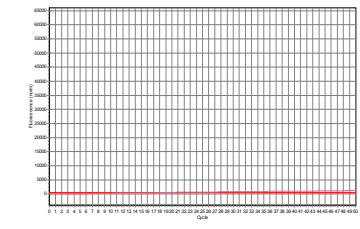

81

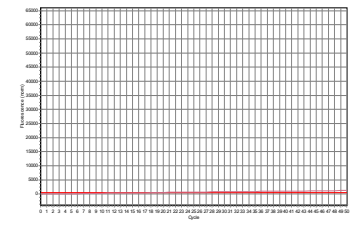

82

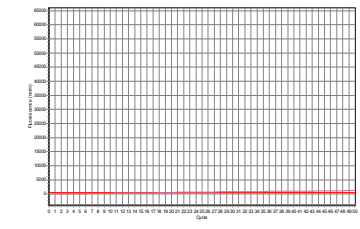

83

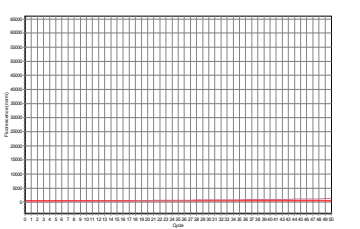

84

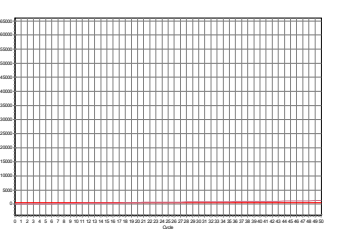

85

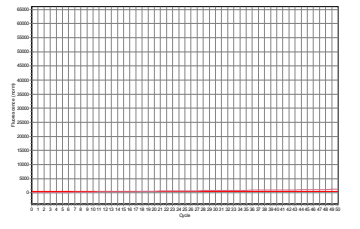

86

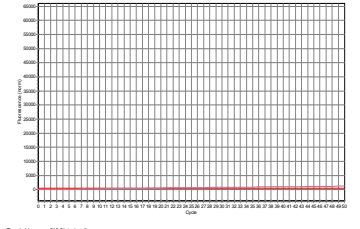

87

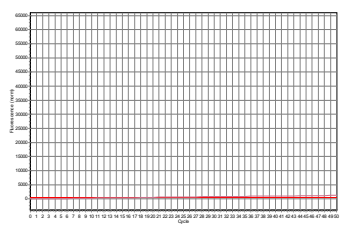

88

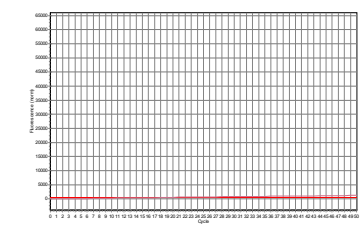

89

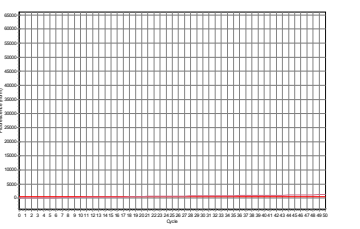

90

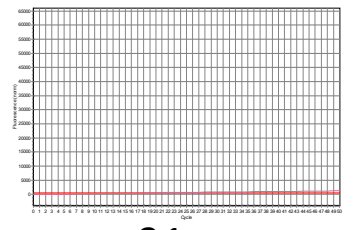

91

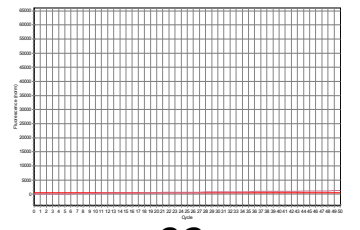

92

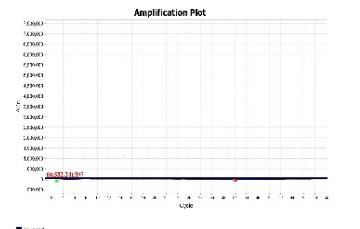

93

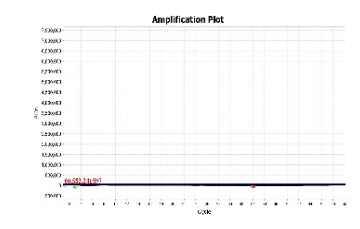

94

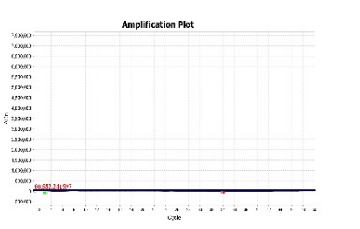

95

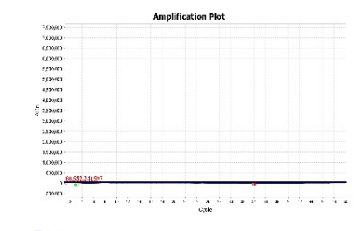

96

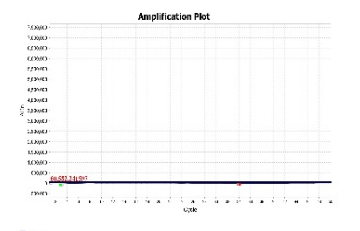

97

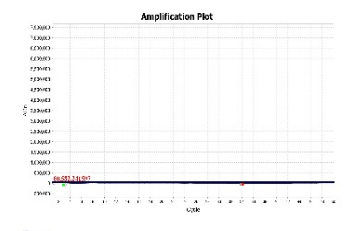

98

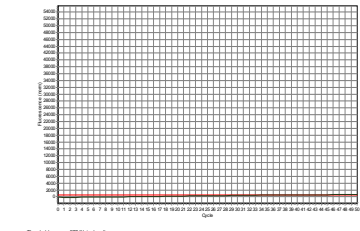

99

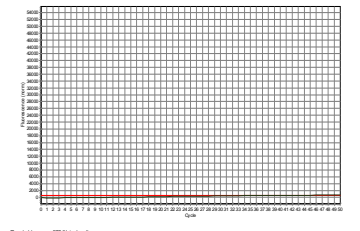

100



# CCNH-c5orf30-PROSTATE-BLOOD SAMPLE 101-120

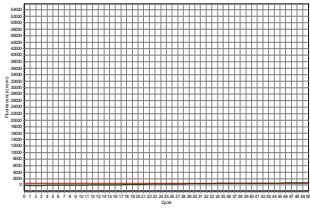

Target 1  
101

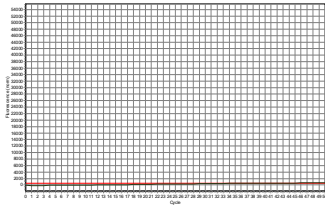

Target 1  
102

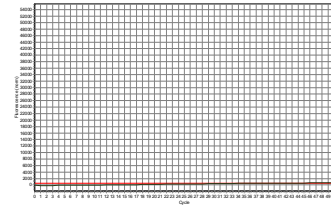

Target 1  
103

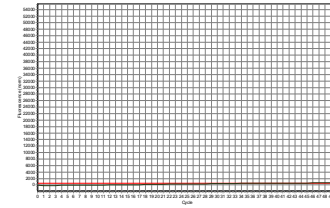

Target 1  
104

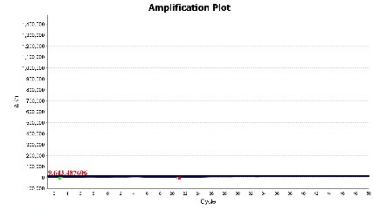

Target 1  
105

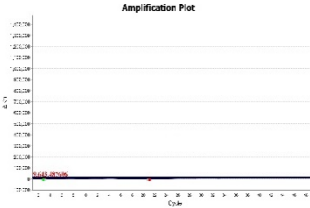

Target 1  
106

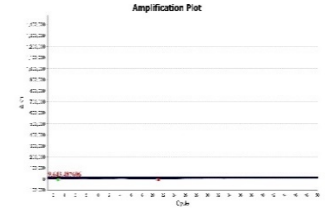

Target 1  
107

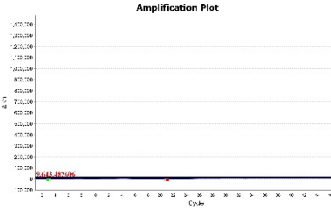

Target 1  
108

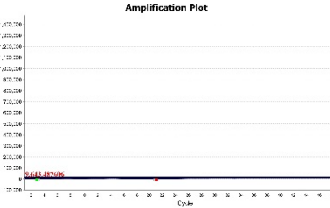

Target 1  
109

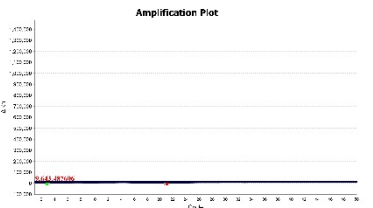

Target 1  
110

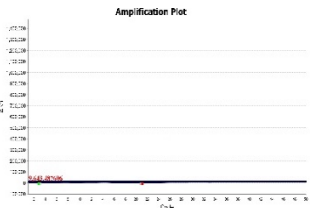

Target 1  
111

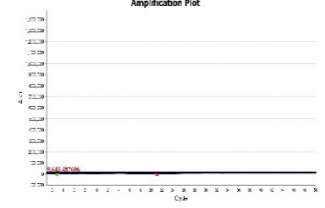

Target 1  
111

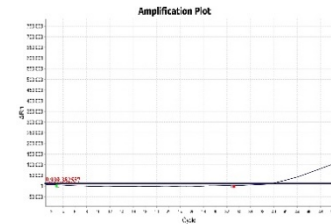

Target 1  
113

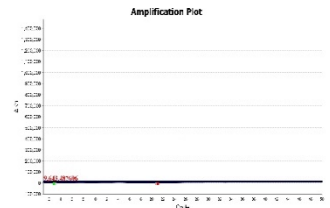

Target 1  
114

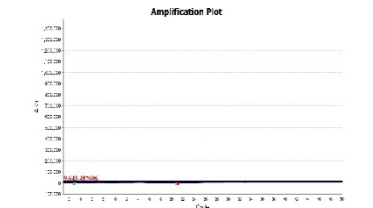

Target 1  
115

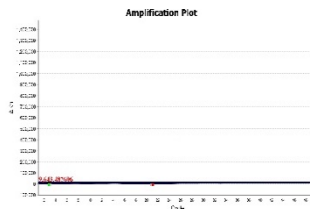

Target 1  
116

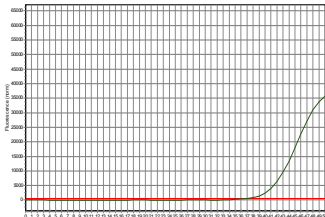

Target 1  
117

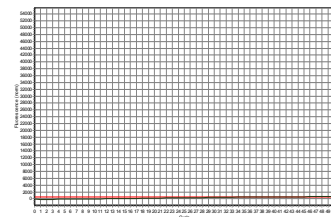

Target 1  
118

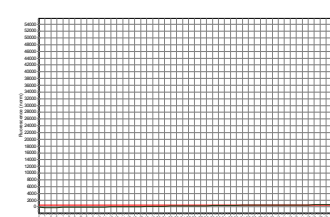

Target 1  
119

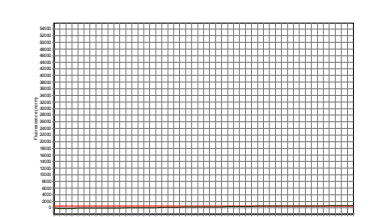

Target 1  
120



# CCNH-c5orf30-PROSTATE-BLOOD SAMPLE 121-140

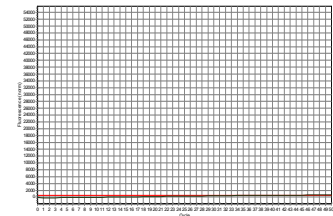

Threshold: 0.77 (Noisiness)  
Baseline settings: automatic, DR correction OFF  
**121**

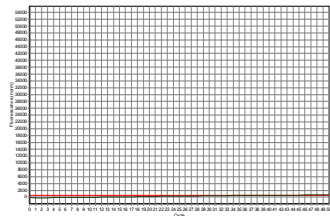

Threshold: 0.77 (Noisiness)  
Baseline settings: automatic, DR correction OFF  
**122**

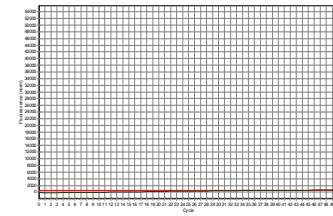

Threshold: 0.77 (Noisiness)  
Baseline settings: automatic, DR correction OFF  
**123**

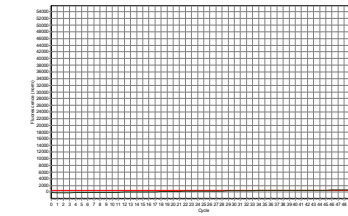

Threshold: 0.77 (Noisiness)  
Baseline settings: automatic, DR correction OFF  
**124**

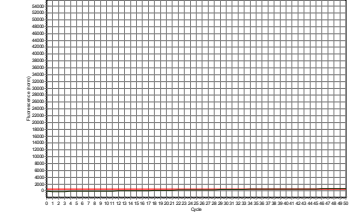

Threshold: 0.77 (Noisiness)  
Baseline settings: automatic, DR correction OFF  
**125**

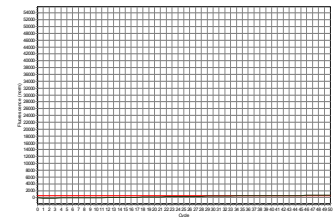

Threshold: 0.77 (Noisiness)  
Baseline settings: automatic, DR correction OFF  
**126**

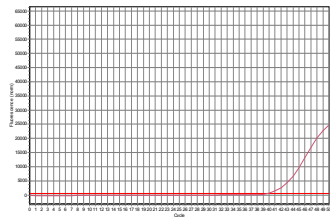

Threshold: 0.60 (Noisiness)  
Baseline settings: automatic, DR correction OFF  
**127**

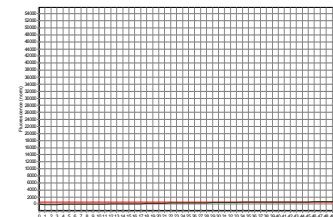

Threshold: 0.77 (Noisiness)  
Baseline settings: automatic, DR correction OFF  
**128**

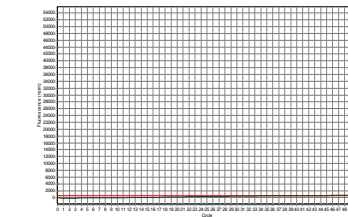

Threshold: 0.77 (Noisiness)  
Baseline settings: automatic, DR correction OFF  
**129**

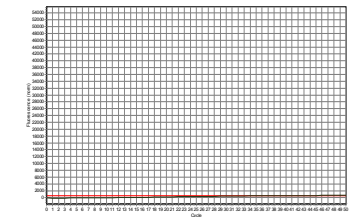

Threshold: 0.77 (Noisiness)  
Baseline settings: automatic, DR correction OFF  
**130**

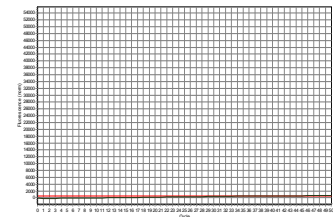

Threshold: 0.77 (Noisiness)  
Baseline settings: automatic, DR correction OFF  
**131**

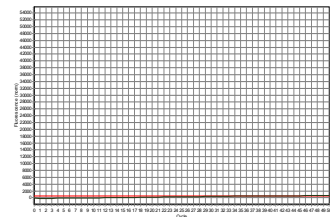

Threshold: 0.77 (Noisiness)  
Baseline settings: automatic, DR correction OFF  
**132**

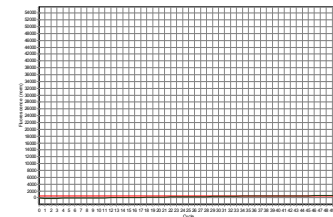

Threshold: 0.77 (Noisiness)  
Baseline settings: automatic, DR correction OFF  
**133**

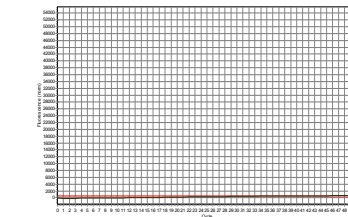

Threshold: 0.77 (Noisiness)  
Baseline settings: automatic, DR correction OFF  
**134**

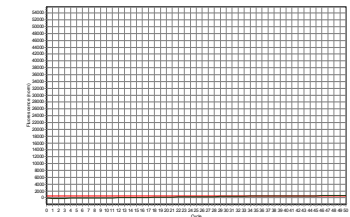

Threshold: 0.77 (Noisiness)  
Baseline settings: automatic, DR correction OFF  
**135**

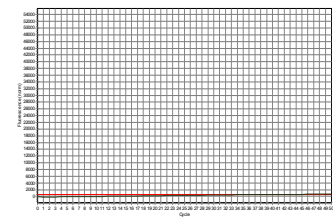

Threshold: 0.77 (Noisiness)  
Baseline settings: automatic, DR correction OFF  
**136**

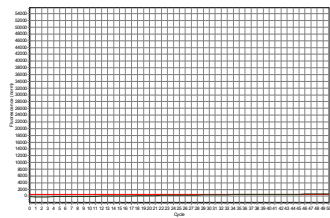

Threshold: 0.77 (Noisiness)  
Baseline settings: automatic, DR correction OFF  
**137**

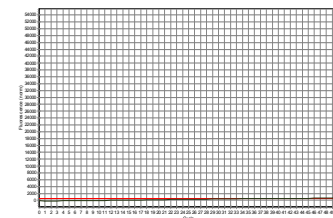

Threshold: 0.77 (Noisiness)  
Baseline settings: automatic, DR correction OFF  
**138**

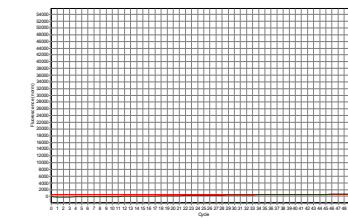

Threshold: 0.77 (Noisiness)  
Baseline settings: automatic, DR correction OFF  
**139**

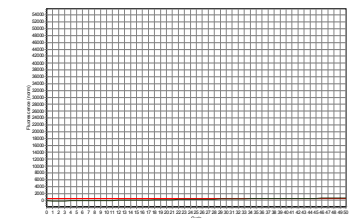

Threshold: 0.77 (Noisiness)  
Baseline settings: automatic, DR correction OFF  
**140**

# CCNH-c5orf30-PROSTATE-BLOOD SAMPLE 141-150

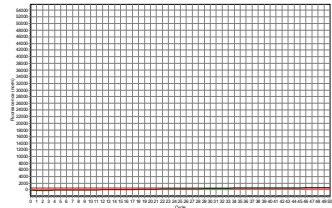

Threshold: 577 (Noisefloor)  
Baseline settings: automatic, DR correction OFF

141

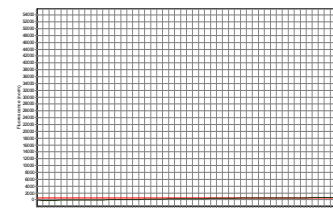

Threshold: 577 (Noisefloor)  
Baseline settings: automatic, DR correction OFF

142

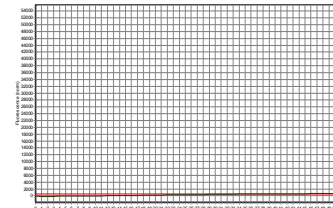

Threshold: 577 (Noisefloor)  
Baseline settings: automatic, DR correction OFF

143

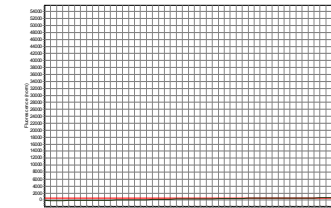

Threshold: 577 (Noisefloor)  
Baseline settings: automatic, DR correction OFF

144

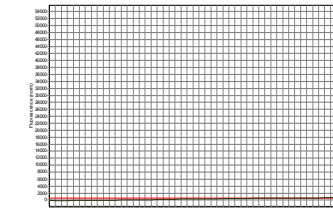

Threshold: 577 (Noisefloor)  
Baseline settings: automatic, DR correction OFF

145

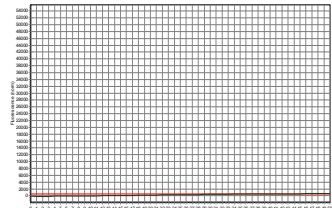

Threshold: 577 (Noisefloor)  
Baseline settings: automatic, DR correction OFF

146

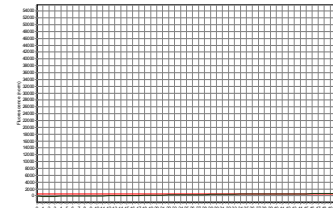

Threshold: 577 (Noisefloor)  
Baseline settings: automatic, DR correction OFF

147

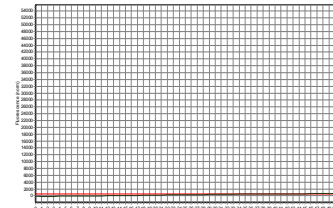

Threshold: 577 (Noisefloor)  
Baseline settings: automatic, DR correction OFF

148

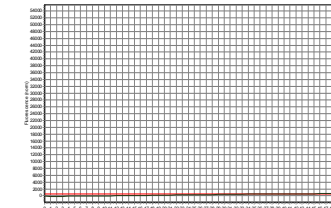

Threshold: 577 (Noisefloor)  
Baseline settings: automatic, DR correction OFF

149

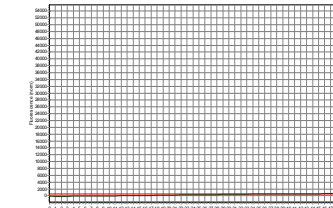

Threshold: 577 (Noisefloor)  
Baseline settings: automatic, DR correction OFF

150

# Supplemental figure 5

## KDM4B-AC011523.2 fusion detection KDM4B-AC011523.2 -PROSTATE-BLOOD SAMPLE 1-20

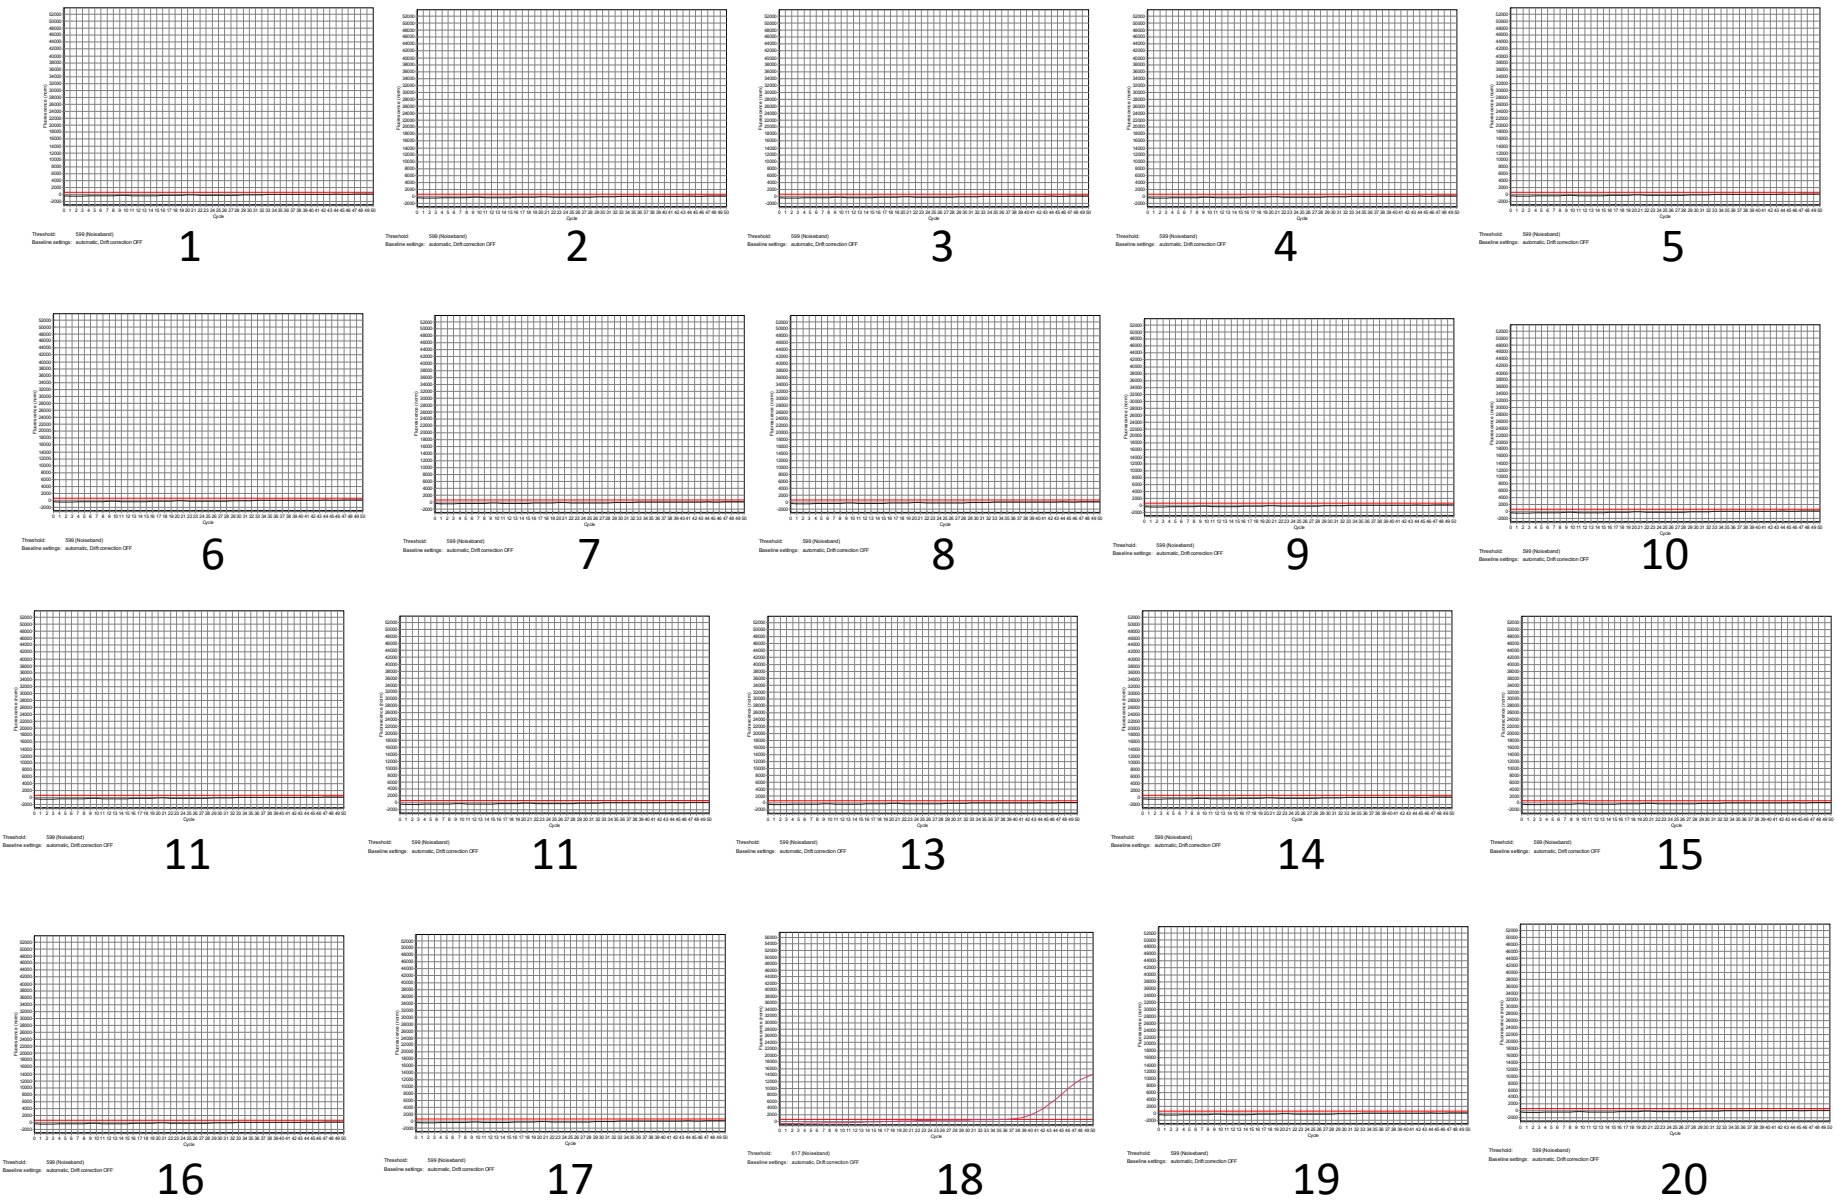

# KDM4B-AC011523.2-PROSTATE-BLOOD SAMPLE 21-40

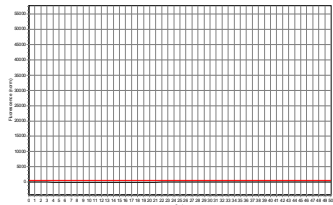

Threshold: 487 (None/blank)  
Baseline settings: automatic, DR correction OFF

21

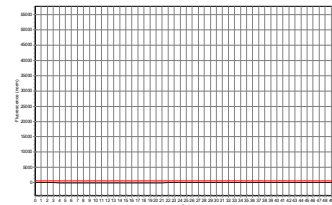

Threshold: 487 (None/blank)  
Baseline settings: automatic, DR correction OFF

22

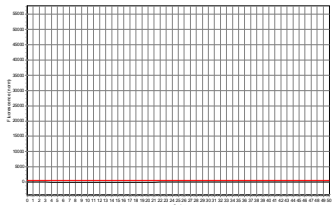

Threshold: 487 (None/blank)  
Baseline settings: automatic, DR correction OFF

23

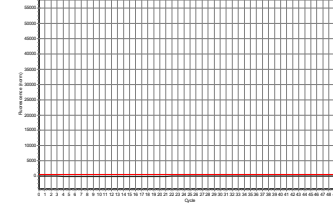

Threshold: 487 (None/blank)  
Baseline settings: automatic, DR correction OFF

24

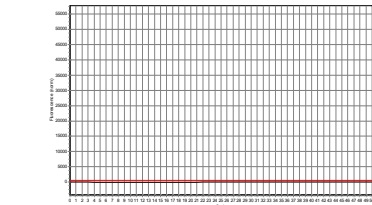

Threshold: 487 (None/blank)  
Baseline settings: automatic, DR correction OFF

25

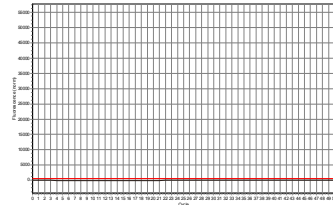

Threshold: 487 (None/blank)  
Baseline settings: automatic, DR correction OFF

26

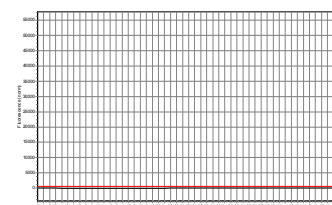

Threshold: 487 (None/blank)  
Baseline settings: automatic, DR correction OFF

27

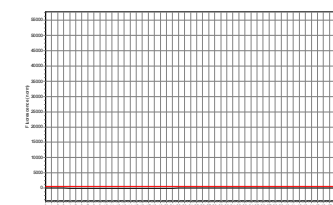

Threshold: 487 (None/blank)  
Baseline settings: automatic, DR correction OFF

28

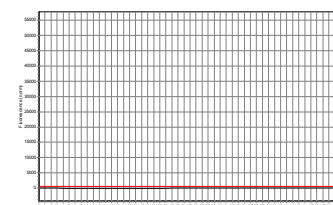

Threshold: 487 (None/blank)  
Baseline settings: automatic, DR correction OFF

29

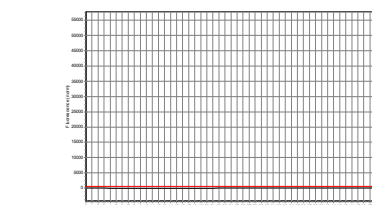

Threshold: 487 (None/blank)  
Baseline settings: automatic, DR correction OFF

30

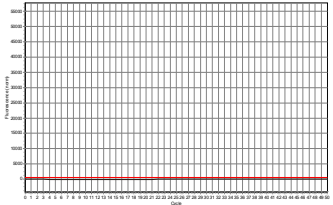

Threshold: 487 (None/blank)  
Baseline settings: automatic, DR correction OFF

31

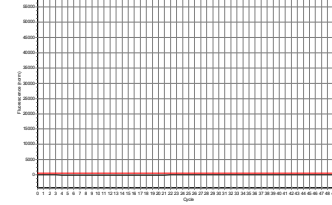

Threshold: 487 (None/blank)  
Baseline settings: automatic, DR correction OFF

32

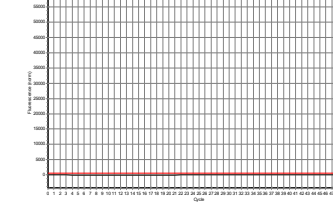

Threshold: 487 (None/blank)  
Baseline settings: automatic, DR correction OFF

33

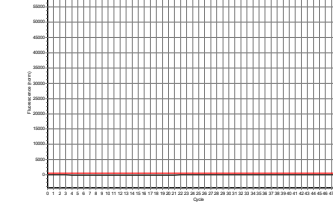

Threshold: 487 (None/blank)  
Baseline settings: automatic, DR correction OFF

34

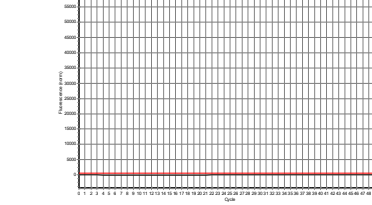

Threshold: 487 (None/blank)  
Baseline settings: automatic, DR correction OFF

35

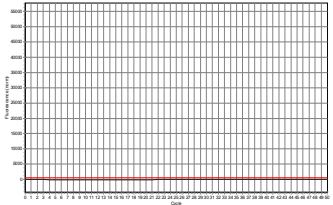

Threshold: 487 (None/blank)  
Baseline settings: automatic, DR correction OFF

36

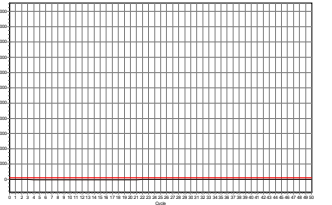

Threshold: 487 (None/blank)  
Baseline settings: automatic, DR correction OFF

37

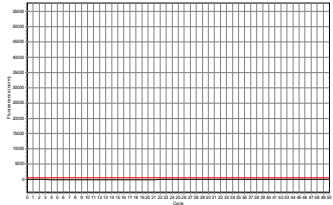

Threshold: 487 (None/blank)  
Baseline settings: automatic, DR correction OFF

38

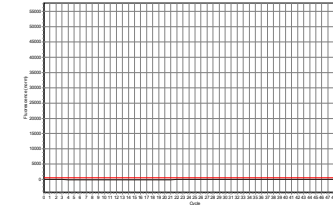

Threshold: 487 (None/blank)  
Baseline settings: automatic, DR correction OFF

39

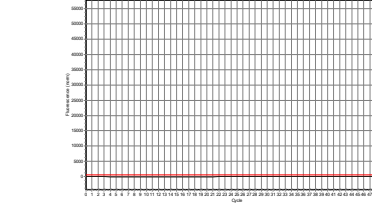

Threshold: 487 (None/blank)  
Baseline settings: automatic, DR correction OFF

40

# KDM4B-AC011523.2-PROSTATE-BLOOD SAMPLE 41-60

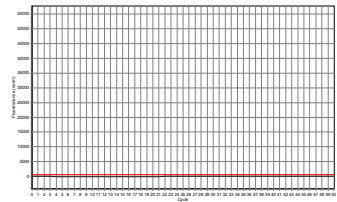

Threshold: 487 (None/and)  
Baseline settings: automatic, DR correction OFF

41

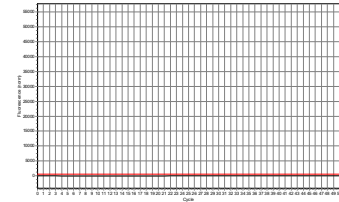

Threshold: 487 (None/and)  
Baseline settings: automatic, DR correction OFF

42

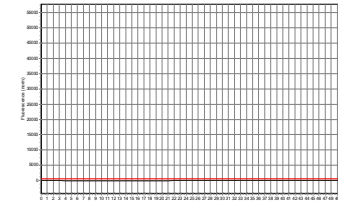

Threshold: 487 (None/and)  
Baseline settings: automatic, DR correction OFF

43

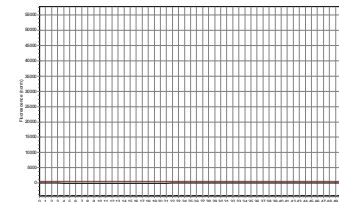

Threshold: 487 (None/and)  
Baseline settings: automatic, DR correction OFF

44

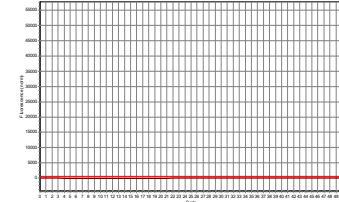

Threshold: 487 (None/and)  
Baseline settings: automatic, DR correction OFF

45

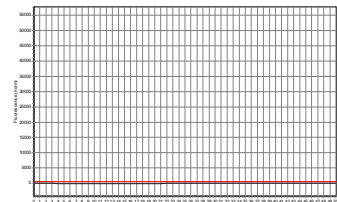

Threshold: 487 (None/and)  
Baseline settings: automatic, DR correction OFF

46

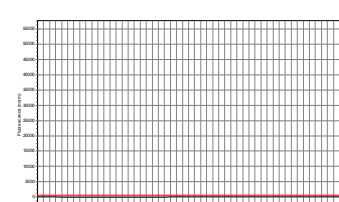

Threshold: 487 (None/and)  
Baseline settings: automatic, DR correction OFF

47

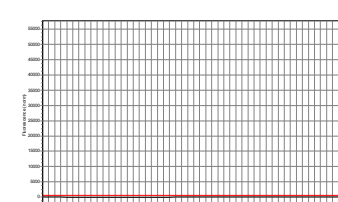

Threshold: 487 (None/and)  
Baseline settings: automatic, DR correction OFF

47

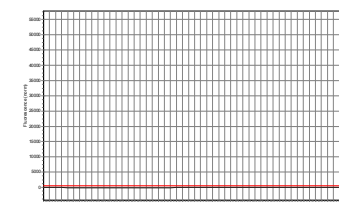

Threshold: 487 (None/and)  
Baseline settings: automatic, DR correction OFF

49

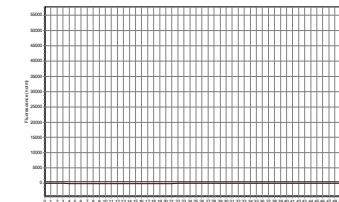

Threshold: 487 (None/and)  
Baseline settings: automatic, DR correction OFF

50

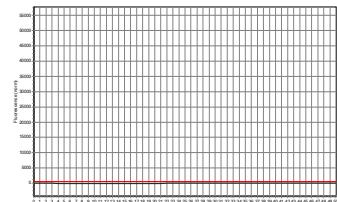

Threshold: 487 (None/and)  
Baseline settings: automatic, DR correction OFF

51

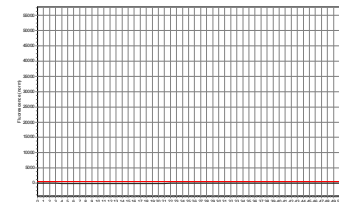

Threshold: 487 (None/and)  
Baseline settings: automatic, DR correction OFF

52

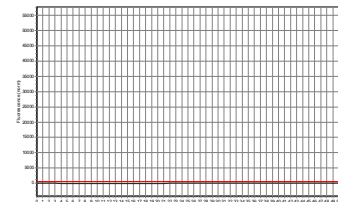

Threshold: 487 (None/and)  
Baseline settings: automatic, DR correction OFF

53

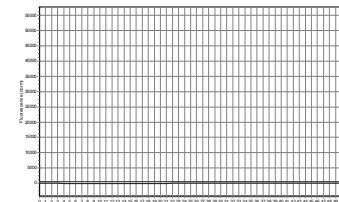

Threshold: 487 (None/and)  
Baseline settings: automatic, DR correction OFF

54

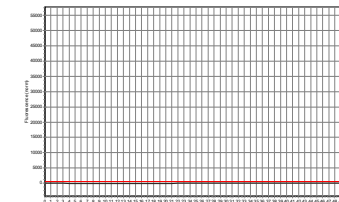

Threshold: 487 (None/and)  
Baseline settings: automatic, DR correction OFF

55

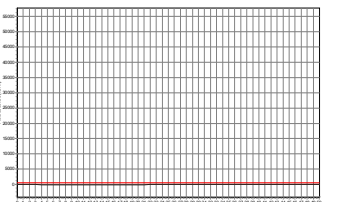

Threshold: 487 (None/and)  
Baseline settings: automatic, DR correction OFF

56

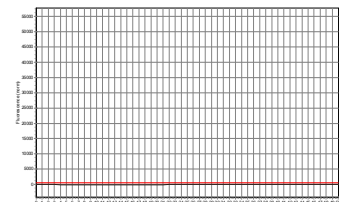

Threshold: 487 (None/and)  
Baseline settings: automatic, DR correction OFF

57

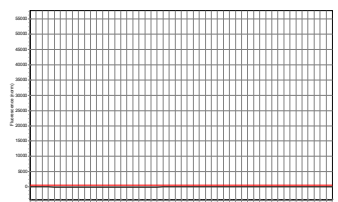

Threshold: 487 (None/and)  
Baseline settings: automatic, DR correction OFF

58

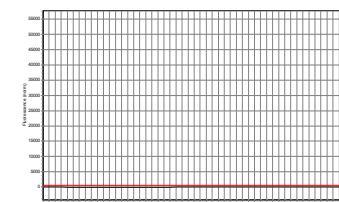

Threshold: 487 (None/and)  
Baseline settings: automatic, DR correction OFF

59

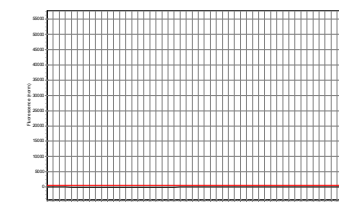

Threshold: 487 (None/and)  
Baseline settings: automatic, DR correction OFF

60

# KDM4B-AC011523.2-PROSTATE-BLOOD SAMPLE 61-80

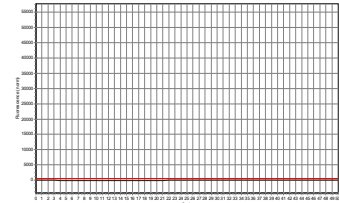

Threshold: 487 (Noiseless)  
Baseline settings: automatic, DR correction OFF  
**61**

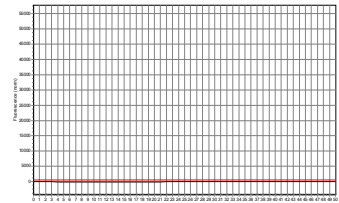

Threshold: 487 (Noiseless)  
Baseline settings: automatic, DR correction OFF  
**62**

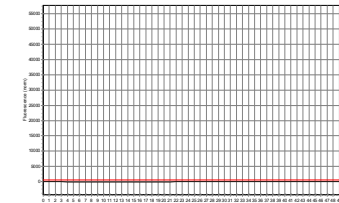

Threshold: 487 (Noiseless)  
Baseline settings: automatic, DR correction OFF  
**63**

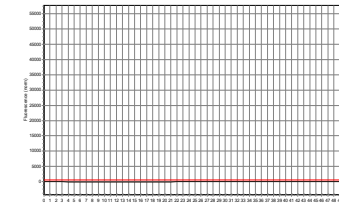

Threshold: 487 (Noiseless)  
Baseline settings: automatic, DR correction OFF  
**64**

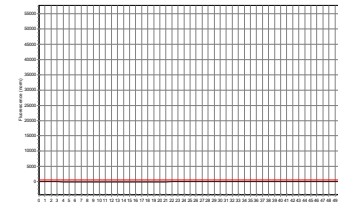

Threshold: 487 (Noiseless)  
Baseline settings: automatic, DR correction OFF  
**65**

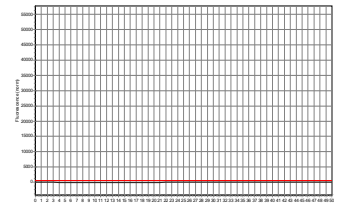

Threshold: 487 (Noiseless)  
Baseline settings: automatic, DR correction OFF  
**66**

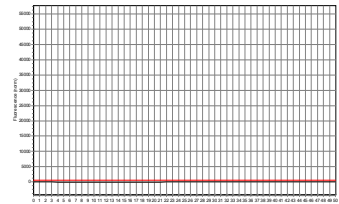

Threshold: 487 (Noiseless)  
Baseline settings: automatic, DR correction OFF  
**67**

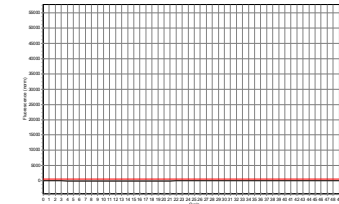

Threshold: 487 (Noiseless)  
Baseline settings: automatic, DR correction OFF  
**68**

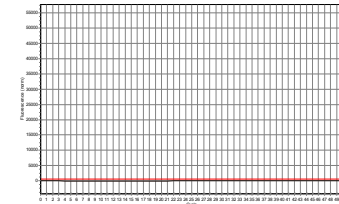

Threshold: 487 (Noiseless)  
Baseline settings: automatic, DR correction OFF  
**69**

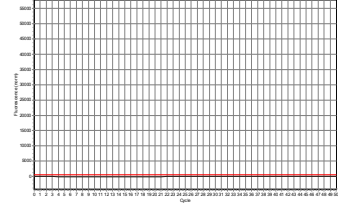

Threshold: 487 (Noiseless)  
Baseline settings: automatic, DR correction OFF  
**70**

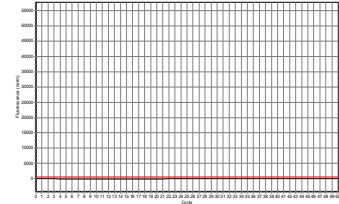

Threshold: 487 (Noiseless)  
Baseline settings: automatic, DR correction OFF  
**71**

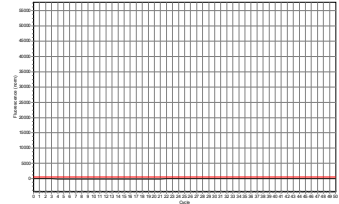

Threshold: 487 (Noiseless)  
Baseline settings: automatic, DR correction OFF  
**72**

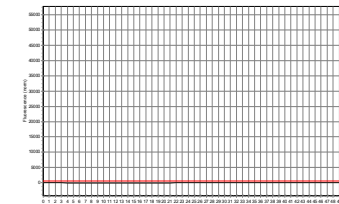

Threshold: 487 (Noiseless)  
Baseline settings: automatic, DR correction OFF  
**73**

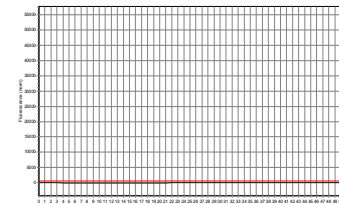

Threshold: 487 (Noiseless)  
Baseline settings: automatic, DR correction OFF  
**74**

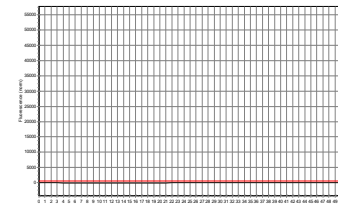

Threshold: 487 (Noiseless)  
Baseline settings: automatic, DR correction OFF  
**75**

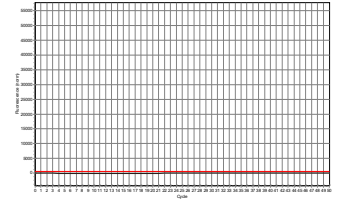

Threshold: 487 (Noiseless)  
Baseline settings: automatic, DR correction OFF  
**76**

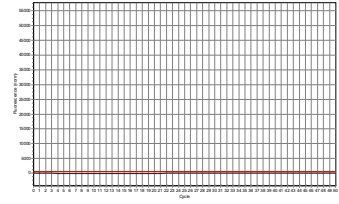

Threshold: 487 (Noiseless)  
Baseline settings: automatic, DR correction OFF  
**77**

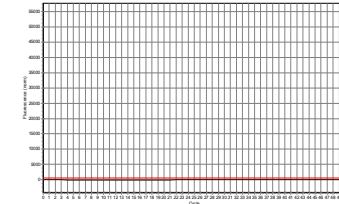

Threshold: 487 (Noiseless)  
Baseline settings: automatic, DR correction OFF  
**78**

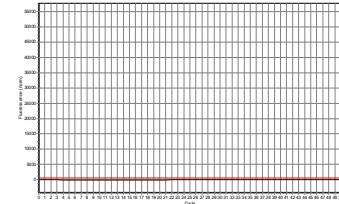

Threshold: 487 (Noiseless)  
Baseline settings: automatic, DR correction OFF  
**79**

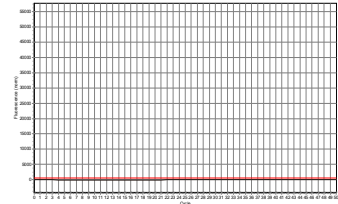

Threshold: 487 (Noiseless)  
Baseline settings: automatic, DR correction OFF  
**80**

# KDM4B-AC011523.2-PROSTATE-BLOOD SAMPLE 81-100

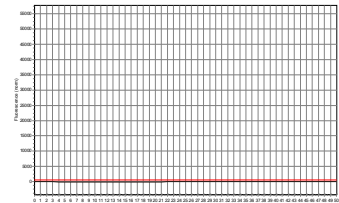

Threshold: 487 (Threshold)  
Baseline settings: automatic, DR correction OFF

**81**

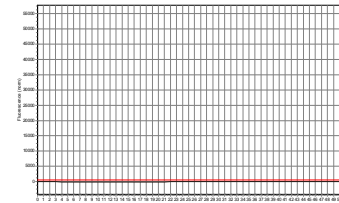

Threshold: 487 (Threshold)  
Baseline settings: automatic, DR correction OFF

**82**

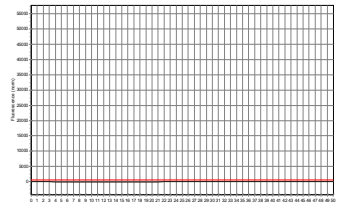

Threshold: 487 (Threshold)  
Baseline settings: automatic, DR correction OFF

**83**

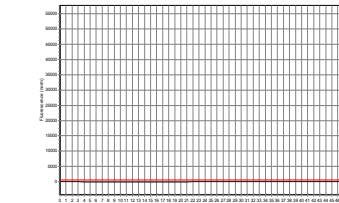

Threshold: 487 (Threshold)  
Baseline settings: automatic, DR correction OFF

**84**

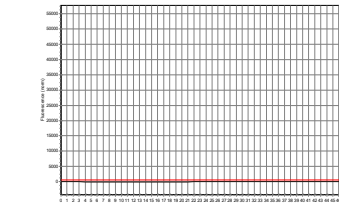

Threshold: 487 (Threshold)  
Baseline settings: automatic, DR correction OFF

**85**

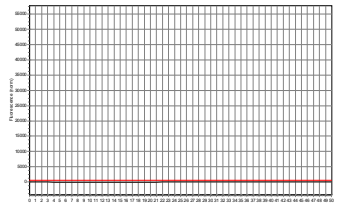

Threshold: 487 (Threshold)  
Baseline settings: automatic, DR correction OFF

**86**

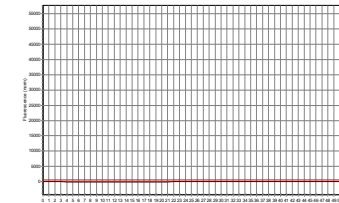

Threshold: 487 (Threshold)  
Baseline settings: automatic, DR correction OFF

**87**

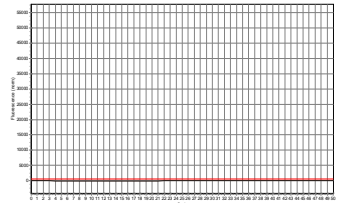

Threshold: 487 (Threshold)  
Baseline settings: automatic, DR correction OFF

**88**

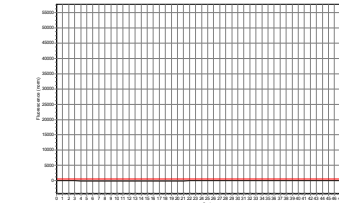

Threshold: 487 (Threshold)  
Baseline settings: automatic, DR correction OFF

**89**

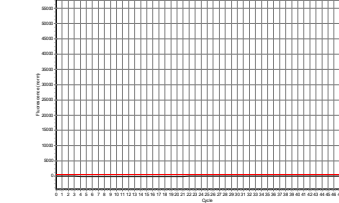

Threshold: 487 (Threshold)  
Baseline settings: automatic, DR correction OFF

**90**

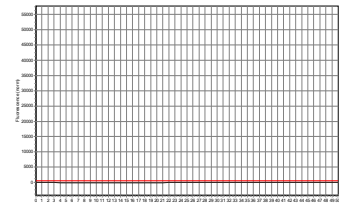

Threshold: 487 (Threshold)  
Baseline settings: automatic, DR correction OFF

**91**

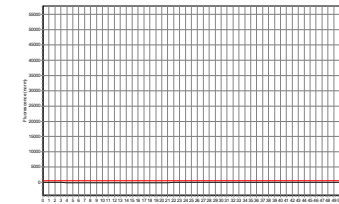

Threshold: 487 (Threshold)  
Baseline settings: automatic, DR correction OFF

**92**

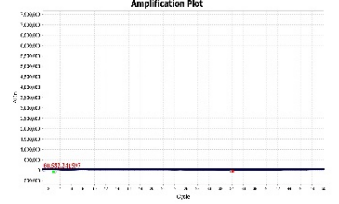

Threshold: 487 (Threshold)  
Baseline settings: automatic, DR correction OFF

**93**

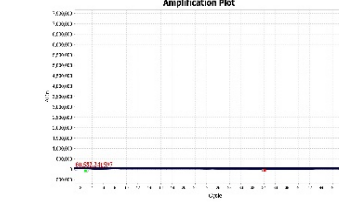

Threshold: 487 (Threshold)  
Baseline settings: automatic, DR correction OFF

**94**

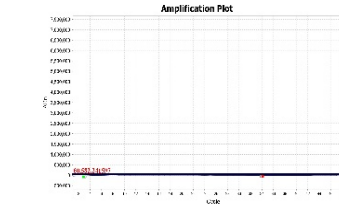

Threshold: 487 (Threshold)  
Baseline settings: automatic, DR correction OFF

**95**

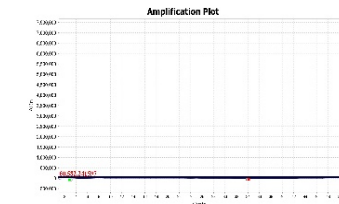

Threshold: 487 (Threshold)  
Baseline settings: automatic, DR correction OFF

**96**

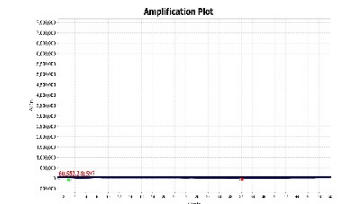

Threshold: 487 (Threshold)  
Baseline settings: automatic, DR correction OFF

**97**

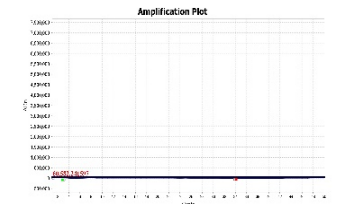

Threshold: 487 (Threshold)  
Baseline settings: automatic, DR correction OFF

**98**

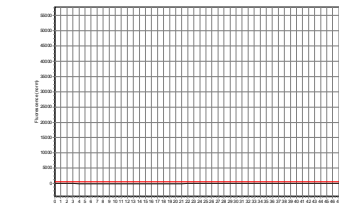

Threshold: 487 (Threshold)  
Baseline settings: automatic, DR correction OFF

**99**

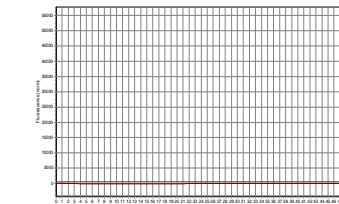

Threshold: 487 (Threshold)  
Baseline settings: automatic, DR correction OFF

**100**



# KDM4B-AC011523.2-PROSTATE-BLOOD SAMPLE 101-120

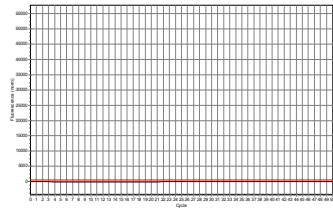

Threshold: 487 (Non-linear)  
Baseline settings: automatic, Drift correction: OFF

101

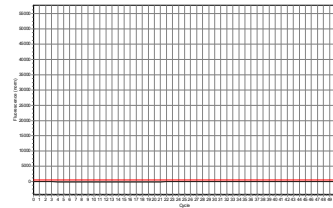

Threshold: 487 (Non-linear)  
Baseline settings: automatic, Drift correction: OFF

102

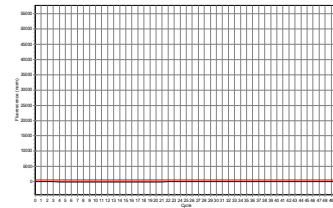

Threshold: 487 (Non-linear)  
Baseline settings: automatic, Drift correction: OFF

103

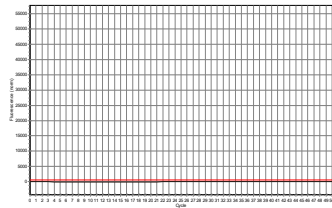

Threshold: 487 (Non-linear)  
Baseline settings: automatic, Drift correction: OFF

104

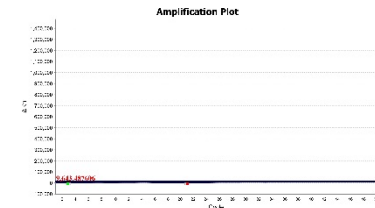

Threshold: 487 (Non-linear)  
Baseline settings: automatic, Drift correction: OFF

105

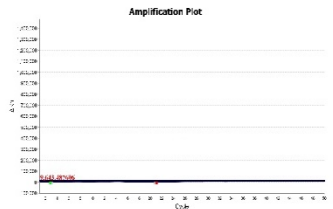

Threshold: 487 (Non-linear)  
Baseline settings: automatic, Drift correction: OFF

106

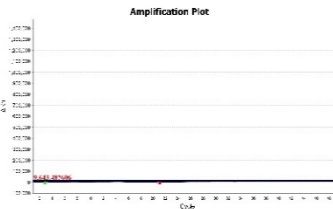

Threshold: 487 (Non-linear)  
Baseline settings: automatic, Drift correction: OFF

107

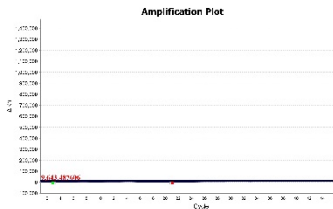

Threshold: 487 (Non-linear)  
Baseline settings: automatic, Drift correction: OFF

108

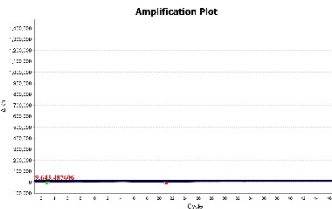

Threshold: 487 (Non-linear)  
Baseline settings: automatic, Drift correction: OFF

109

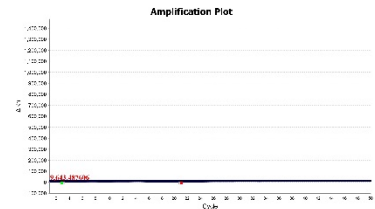

Threshold: 487 (Non-linear)  
Baseline settings: automatic, Drift correction: OFF

110

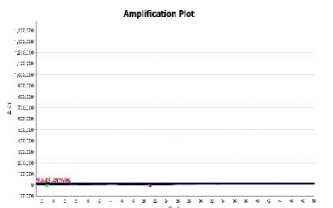

Threshold: 487 (Non-linear)  
Baseline settings: automatic, Drift correction: OFF

111

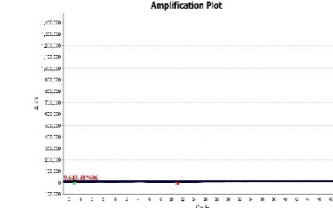

Threshold: 487 (Non-linear)  
Baseline settings: automatic, Drift correction: OFF

111

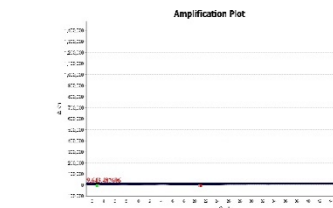

Threshold: 487 (Non-linear)  
Baseline settings: automatic, Drift correction: OFF

113

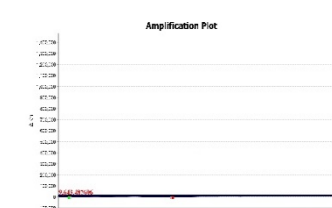

Threshold: 487 (Non-linear)  
Baseline settings: automatic, Drift correction: OFF

114

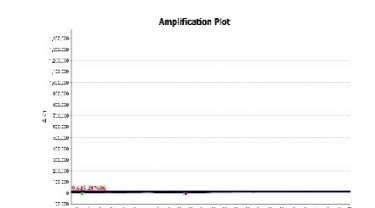

Threshold: 487 (Non-linear)  
Baseline settings: automatic, Drift correction: OFF

115

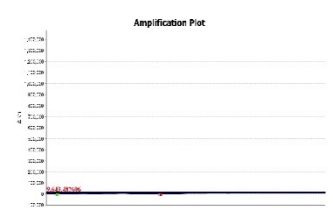

Threshold: 487 (Non-linear)  
Baseline settings: automatic, Drift correction: OFF

116

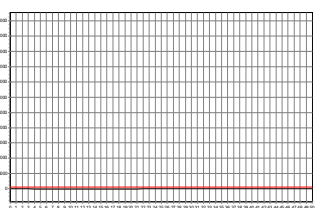

Threshold: 487 (Non-linear)  
Baseline settings: automatic, Drift correction: OFF

117

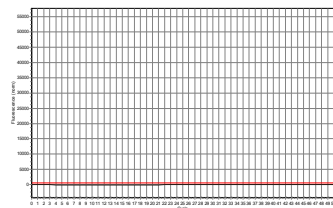

Threshold: 487 (Non-linear)  
Baseline settings: automatic, Drift correction: OFF

118

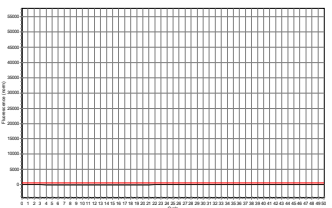

Threshold: 487 (Non-linear)  
Baseline settings: automatic, Drift correction: OFF

119

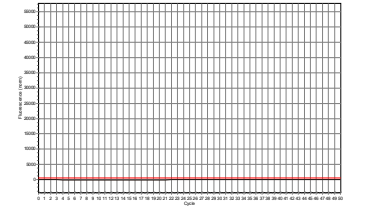

Threshold: 487 (Non-linear)  
Baseline settings: automatic, Drift correction: OFF

120



# KDM4B-AC011523.2-PROSTATE-BLOOD SAMPLE 121-140

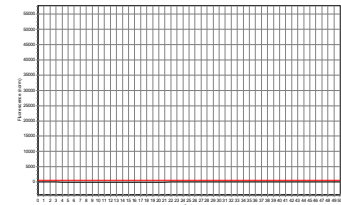

Threshold: 487 (Nonblank)  
Baseline settings: automatic, DR correction OFF

**121**

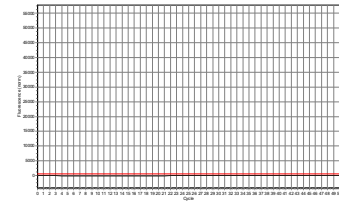

Threshold: 487 (Nonblank)  
Baseline settings: automatic, DR correction OFF

**122**

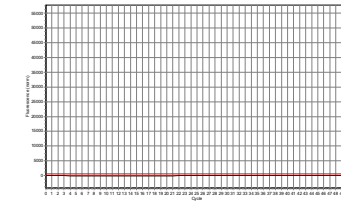

Threshold: 487 (Nonblank)  
Baseline settings: automatic, DR correction OFF

**123**

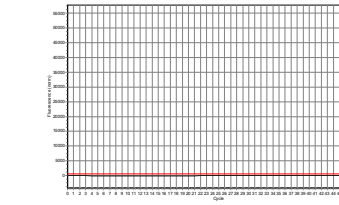

Threshold: 487 (Nonblank)  
Baseline settings: automatic, DR correction OFF

**124**

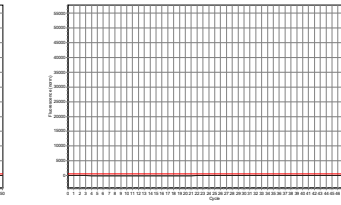

Threshold: 487 (Nonblank)  
Baseline settings: automatic, DR correction OFF

**125**

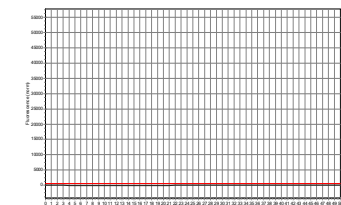

Threshold: 487 (Nonblank)  
Baseline settings: automatic, DR correction OFF

**126**

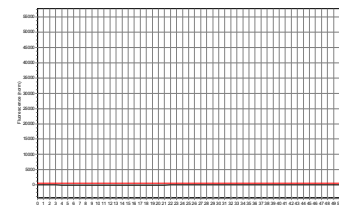

Threshold: 487 (Nonblank)  
Baseline settings: automatic, DR correction OFF

**127**

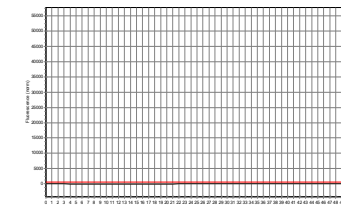

Threshold: 487 (Nonblank)  
Baseline settings: automatic, DR correction OFF

**128**

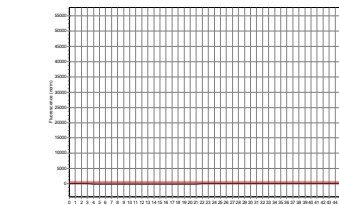

Threshold: 487 (Nonblank)  
Baseline settings: automatic, DR correction OFF

**129**

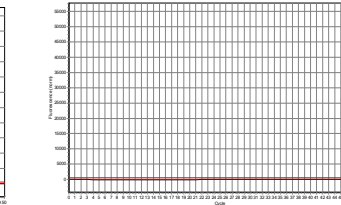

Threshold: 487 (Nonblank)  
Baseline settings: automatic, DR correction OFF

**130**

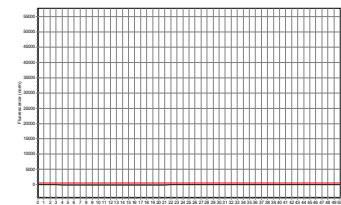

Threshold: 487 (Nonblank)  
Baseline settings: automatic, DR correction OFF

**131**

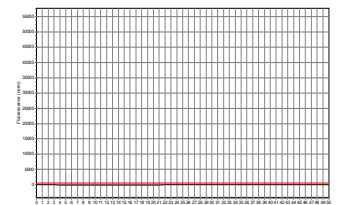

Threshold: 487 (Nonblank)  
Baseline settings: automatic, DR correction OFF

**132**

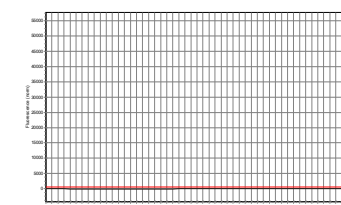

Threshold: 487 (Nonblank)  
Baseline settings: automatic, DR correction OFF

**133**

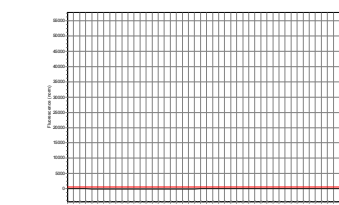

Threshold: 487 (Nonblank)  
Baseline settings: automatic, DR correction OFF

**134**

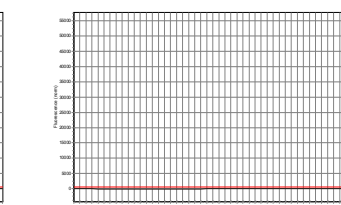

Threshold: 487 (Nonblank)  
Baseline settings: automatic, DR correction OFF

**135**

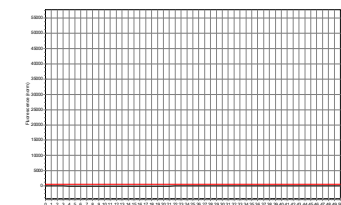

Threshold: 487 (Nonblank)  
Baseline settings: automatic, DR correction OFF

**136**

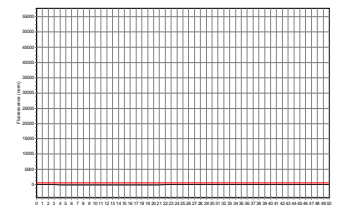

Threshold: 487 (Nonblank)  
Baseline settings: automatic, DR correction OFF

**137**

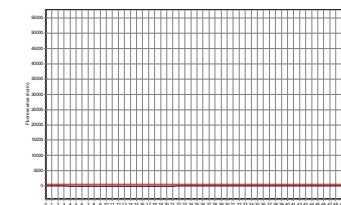

Threshold: 487 (Nonblank)  
Baseline settings: automatic, DR correction OFF

**138**

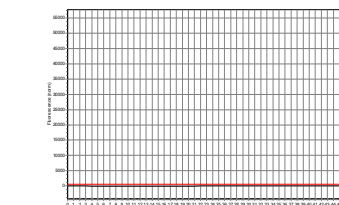

Threshold: 487 (Nonblank)  
Baseline settings: automatic, DR correction OFF

**139**

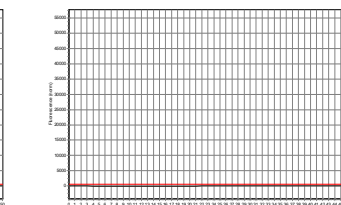

Threshold: 487 (Nonblank)  
Baseline settings: automatic, DR correction OFF

**140**

# KDM4B-AC011523.2-PROSTATE-BLOOD SAMPLE 141-150

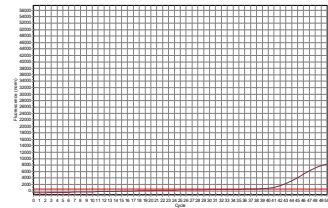

Threshold: 47 (Nonband)  
Baseline settings: automatic, DR correction OFF

141

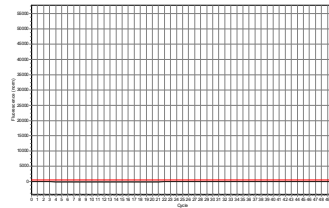

Threshold: 47 (Nonband)  
Baseline settings: automatic, DR correction OFF

142

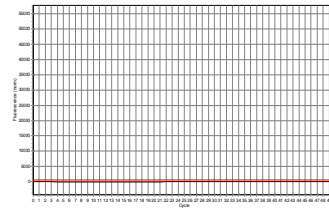

Threshold: 47 (Nonband)  
Baseline settings: automatic, DR correction OFF

143

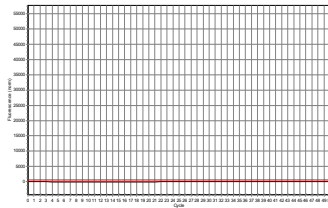

Threshold: 47 (Nonband)  
Baseline settings: automatic, DR correction OFF

144

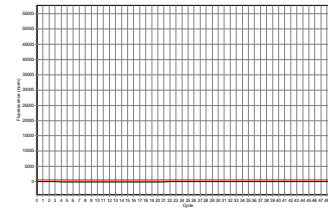

Threshold: 47 (Nonband)  
Baseline settings: automatic, DR correction OFF

145

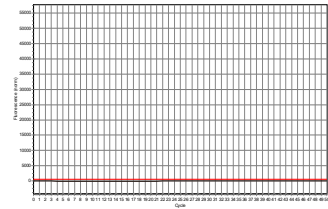

Threshold: 47 (Nonband)  
Baseline settings: automatic, DR correction OFF

146

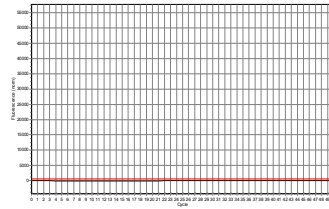

Threshold: 47 (Nonband)  
Baseline settings: automatic, DR correction OFF

147

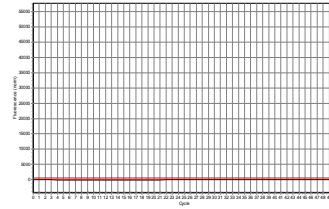

Threshold: 47 (Nonband)  
Baseline settings: automatic, DR correction OFF

148

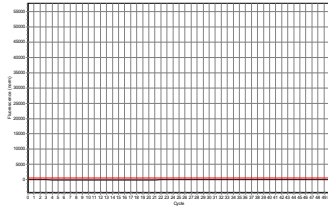

Threshold: 47 (Nonband)  
Baseline settings: automatic, DR correction OFF

149

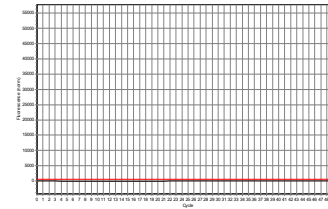

Threshold: 47 (Nonband)  
Baseline settings: automatic, DR correction OFF

150

# Supplemental figure 6

## SLC45A2-AMACR fusion detection SLC45A2-AMACR-PROSTATE-BLOOD SAMPLE 1-20

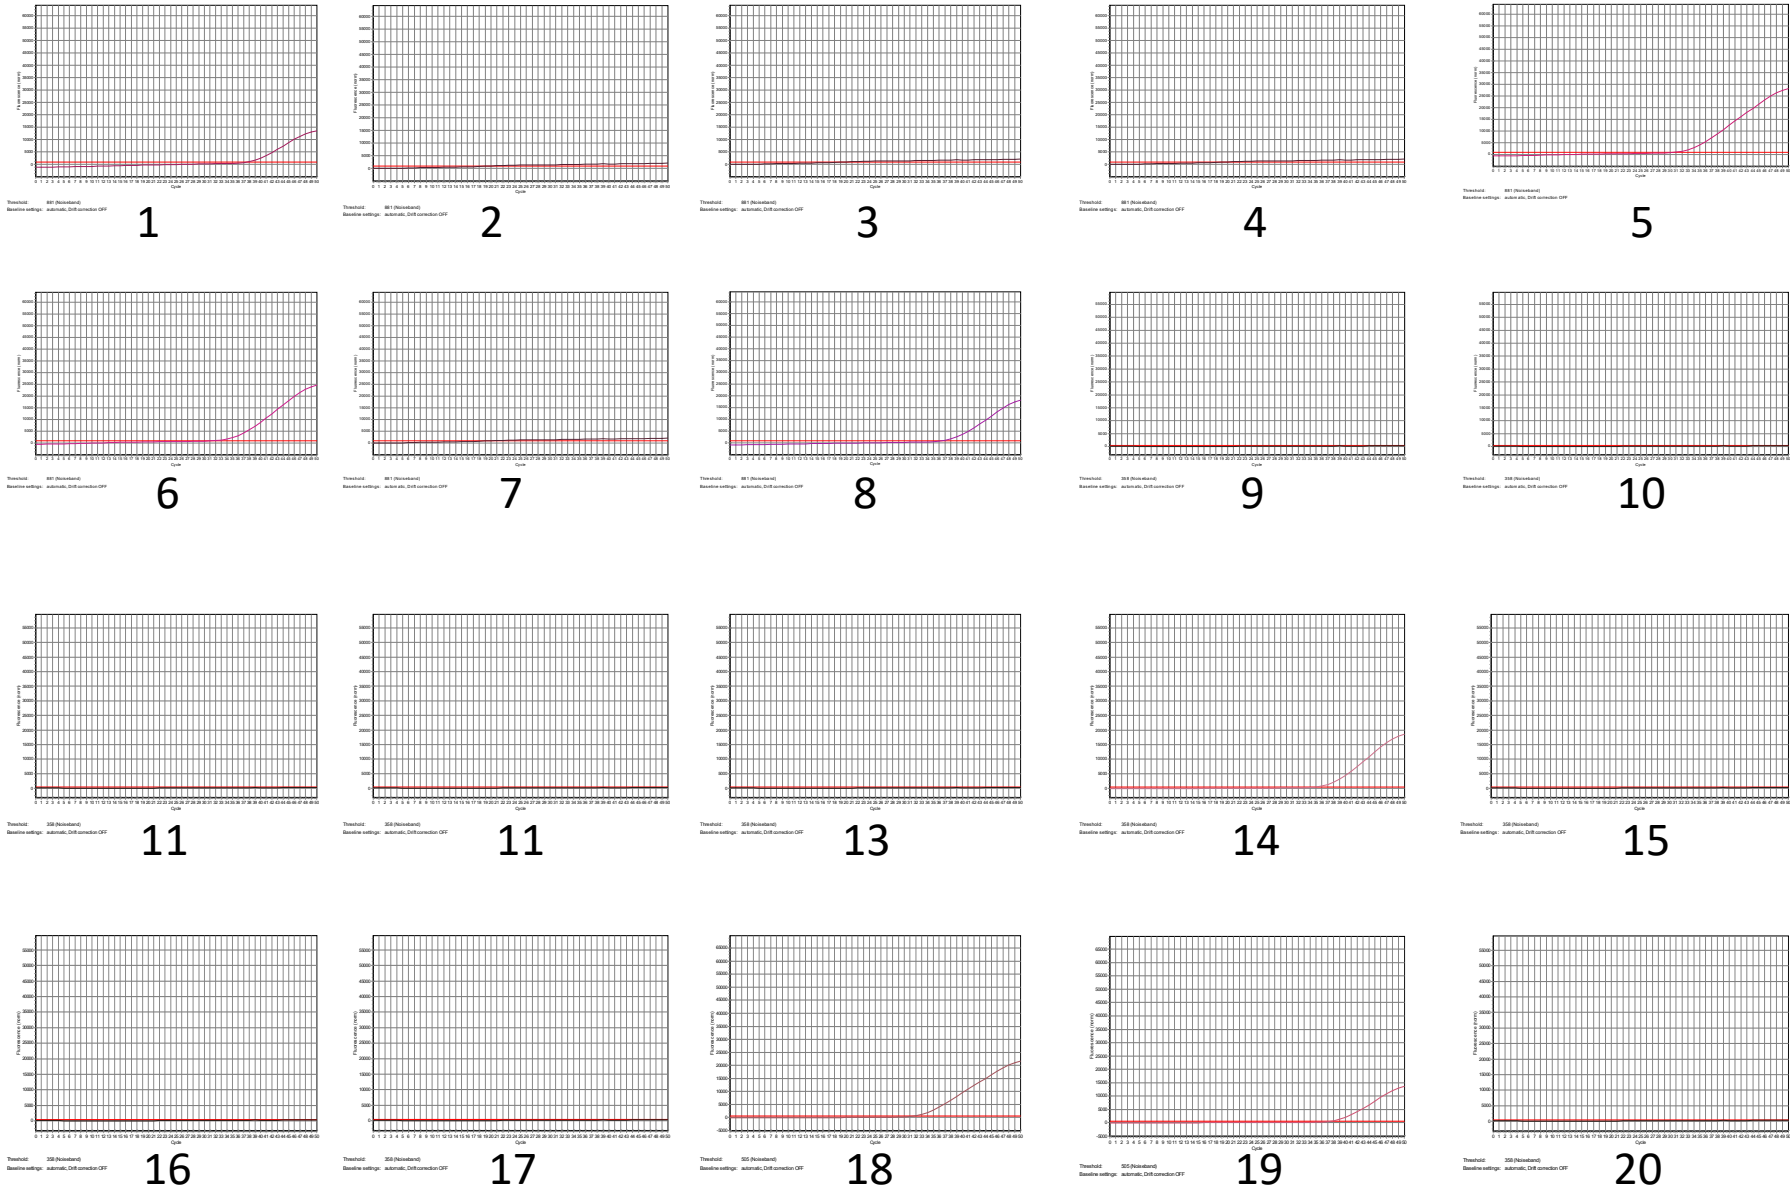

# SLC45A2-AMACR-PROSTATE-BLOOD SAMPLE 21-40

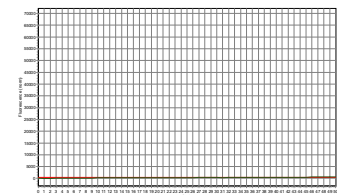

Threshold: 405 (Nonblank)  
Baseline settings: automatic, DR correction OFF

21

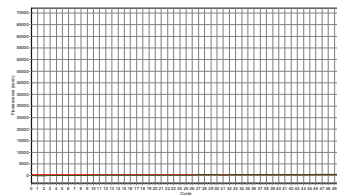

Threshold: 405 (Nonblank)  
Baseline settings: automatic, DR correction OFF

22

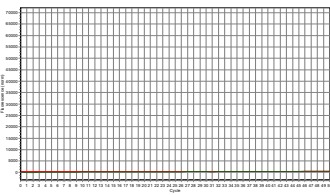

Threshold: 405 (Nonblank)  
Baseline settings: automatic, DR correction OFF

23

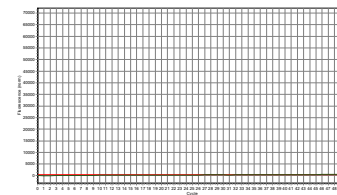

Threshold: 405 (Nonblank)  
Baseline settings: automatic, DR correction OFF

24

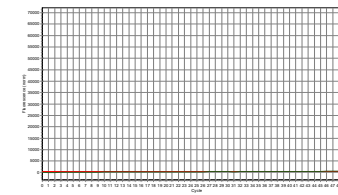

Threshold: 405 (Nonblank)  
Baseline settings: automatic, DR correction OFF

25

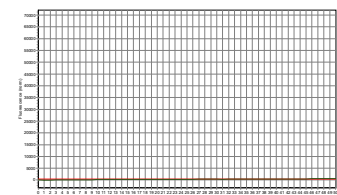

Threshold: 405 (Nonblank)  
Baseline settings: automatic, DR correction OFF

26

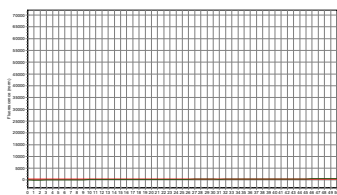

Threshold: 405 (Nonblank)  
Baseline settings: automatic, DR correction OFF

27

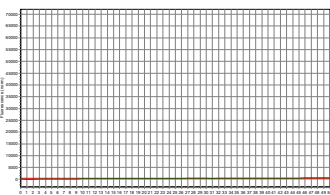

Threshold: 405 (Nonblank)  
Baseline settings: automatic, DR correction OFF

28

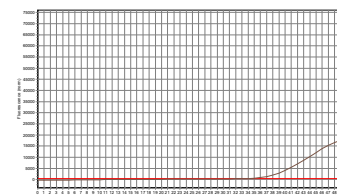

Threshold: 405 (Nonblank)  
Baseline settings: automatic, DR correction OFF

29

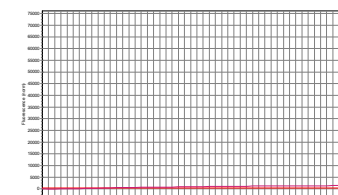

Threshold: 405 (Nonblank)  
Baseline settings: automatic, DR correction OFF

30

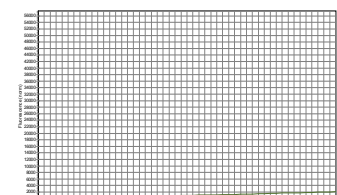

Threshold: 617 (Nonblank)  
Baseline settings: automatic, DR correction OFF

31

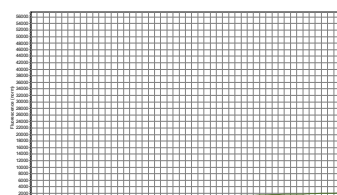

Threshold: 617 (Nonblank)  
Baseline settings: automatic, DR correction OFF

32

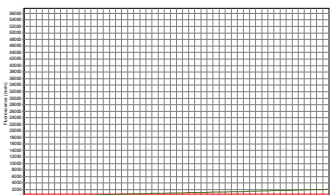

Threshold: 617 (Nonblank)  
Baseline settings: automatic, DR correction OFF

33

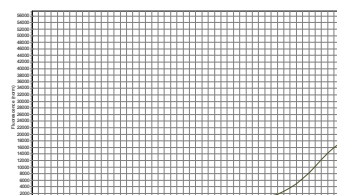

Threshold: 617 (Nonblank)  
Baseline settings: automatic, DR correction OFF

34

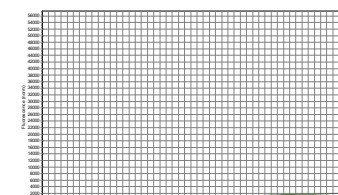

Threshold: 617 (Nonblank)  
Baseline settings: automatic, DR correction OFF

35

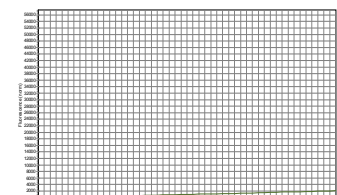

Threshold: 617 (Nonblank)  
Baseline settings: automatic, DR correction OFF

36

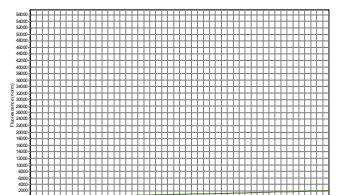

Threshold: 617 (Nonblank)  
Baseline settings: automatic, DR correction OFF

37

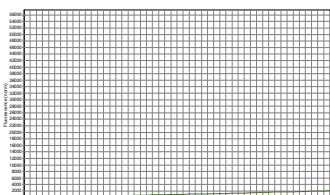

Threshold: 617 (Nonblank)  
Baseline settings: automatic, DR correction OFF

38

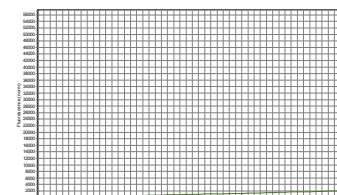

Threshold: 617 (Nonblank)  
Baseline settings: automatic, DR correction OFF

39

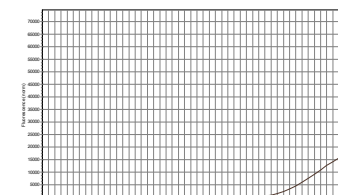

Threshold: 405 (Nonblank)  
Baseline settings: automatic, DR correction OFF

40

# SLC45A2-AMACR-PROSTATE-BLOOD SAMPLE 41-60

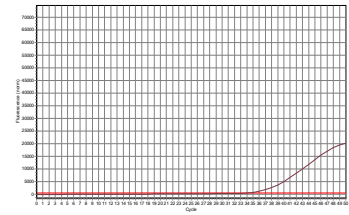

41

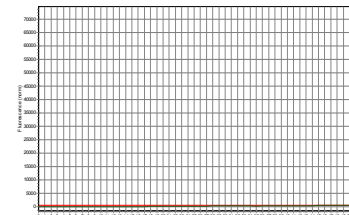

42

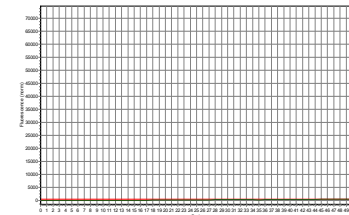

43

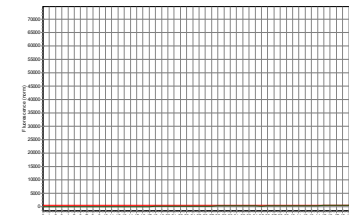

44

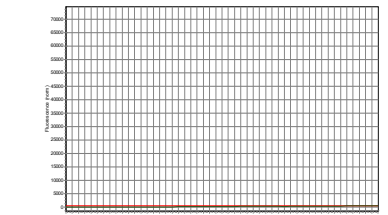

45

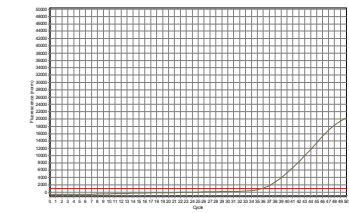

46

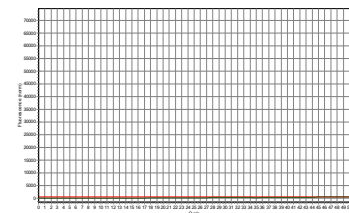

47

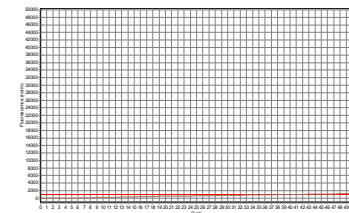

47

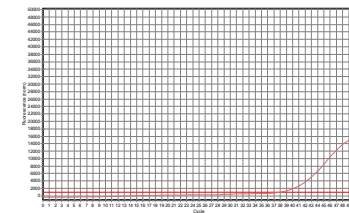

49

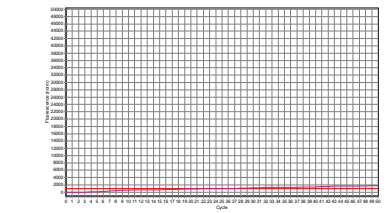

50

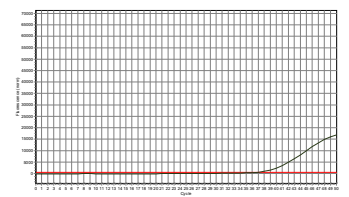

51

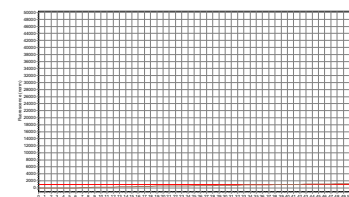

52

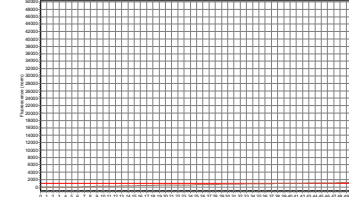

53

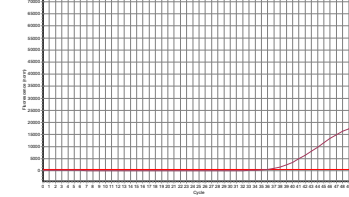

54

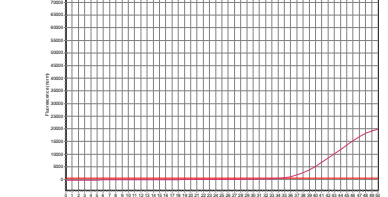

55

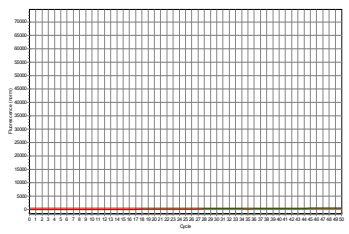

56

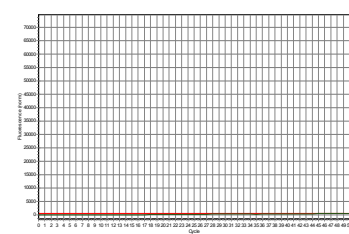

57

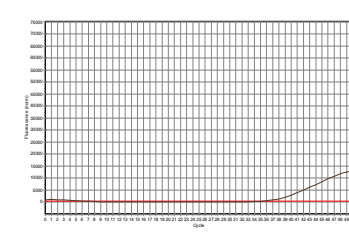

58

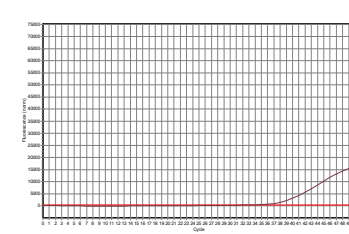

59

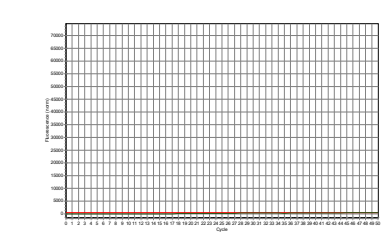

60

# SLC45A2-AMACR-PROSTATE-BLOOD SAMPLE 61-80

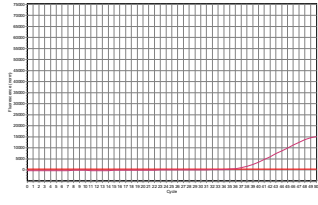

61

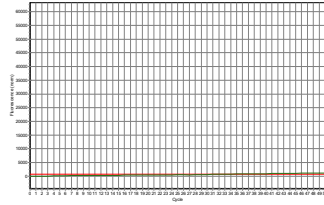

62

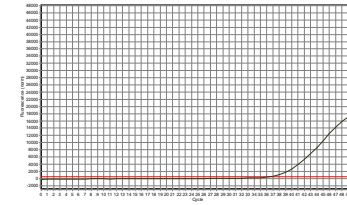

63

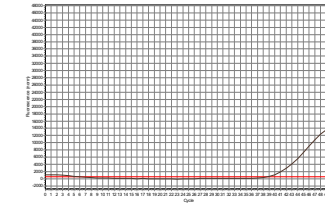

64

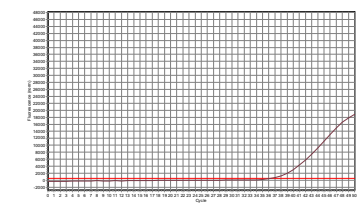

65

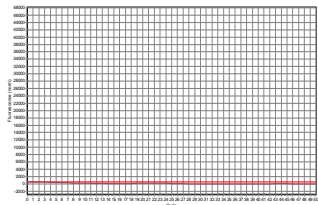

66

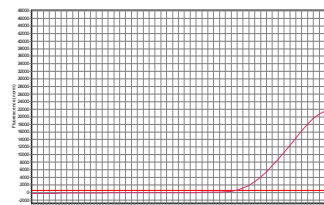

67

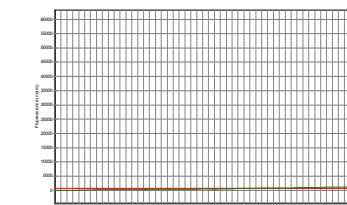

68

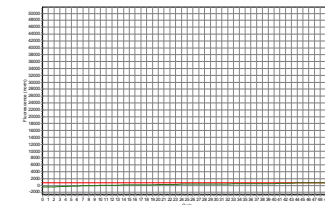

69

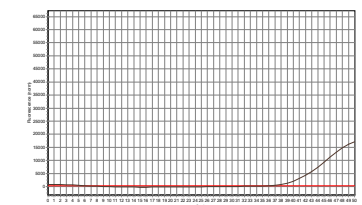

70

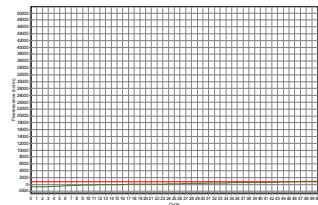

71

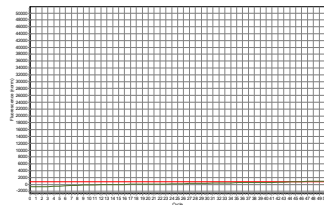

72

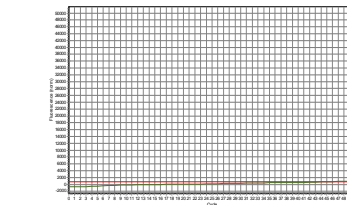

73

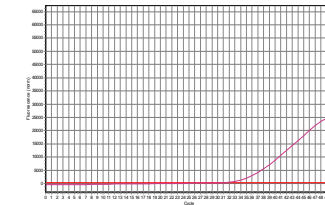

74

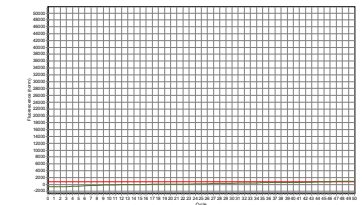

75

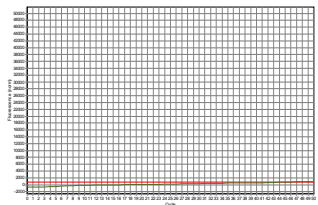

76

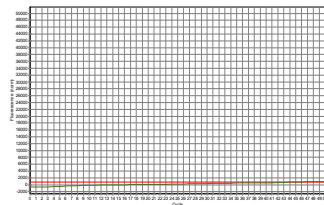

77

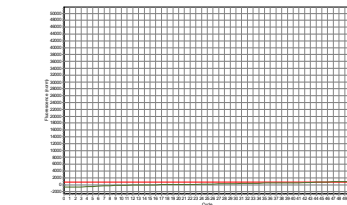

78

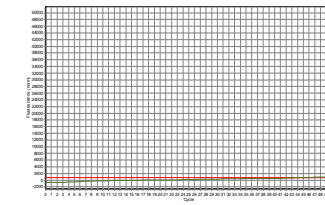

79

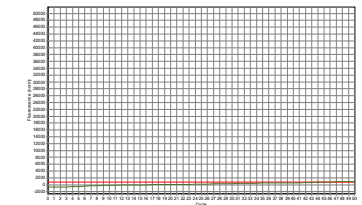

80

# SLC45A2-AMACR-PROSTATE-BLOOD SAMPLE 81-100

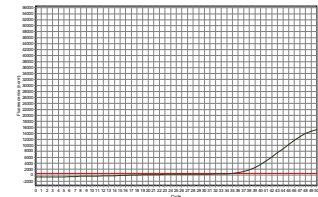

Threshold: 500 (Normalized)  
Baseline settings: automatic, DR correction OFF

81

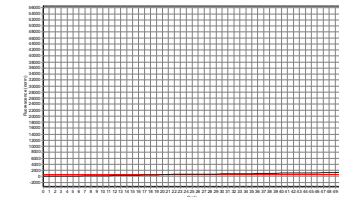

Threshold: 500 (Normalized)  
Baseline settings: automatic, DR correction OFF

82

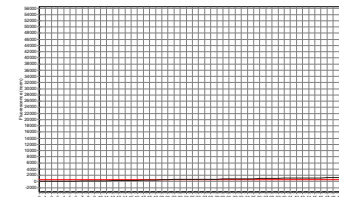

Threshold: 500 (Normalized)  
Baseline settings: automatic, DR correction OFF

83

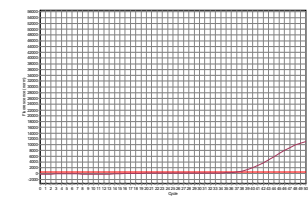

Threshold: 500 (Normalized)  
Baseline settings: automatic, DR correction OFF

84

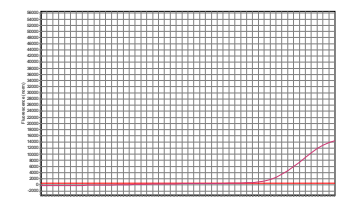

Threshold: 500 (Normalized)  
Baseline settings: automatic, DR correction OFF

85

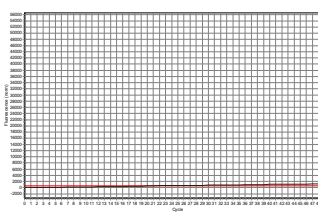

Threshold: 500 (Normalized)  
Baseline settings: automatic, DR correction OFF

86

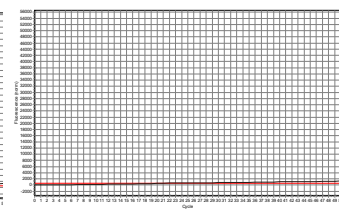

Threshold: 500 (Normalized)  
Baseline settings: automatic, DR correction OFF

87

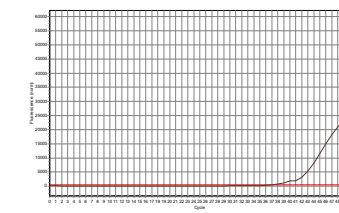

Threshold: 407 (Normalized)  
Baseline settings: automatic, DR correction OFF

88

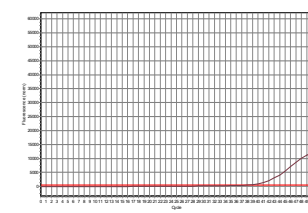

Threshold: 407 (Normalized)  
Baseline settings: automatic, DR correction OFF

89

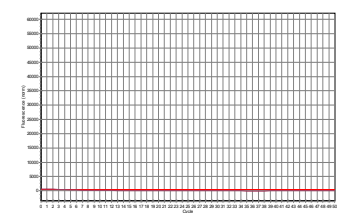

Threshold: 407 (Normalized)  
Baseline settings: automatic, DR correction OFF

90

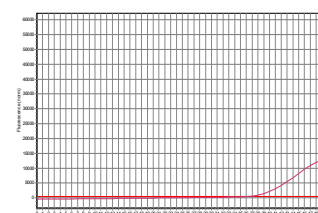

Threshold: 407 (Normalized)  
Baseline settings: automatic, DR correction OFF

91

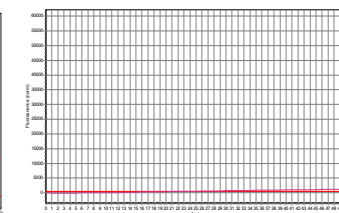

Threshold: 407 (Normalized)  
Baseline settings: automatic, DR correction OFF

92

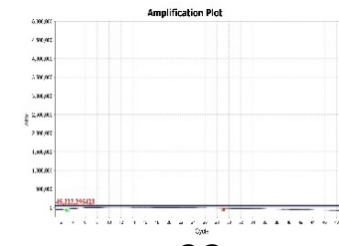

■  $C_{T,amp} = 1$

93

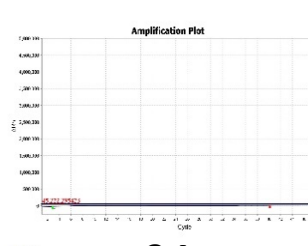

■  $C_{T,amp} = 1$

94

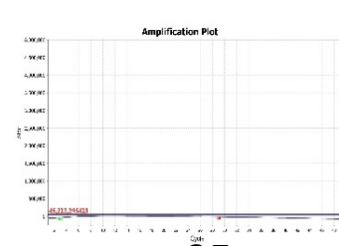

■  $C_{T,amp} = 1$

95

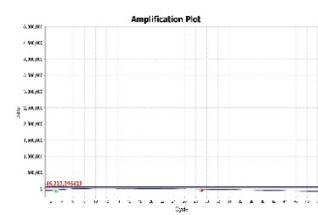

■  $C_{T,amp} = 1$

96

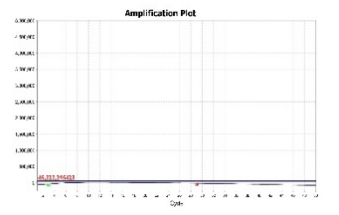

■  $C_{T,amp} = 1$

97

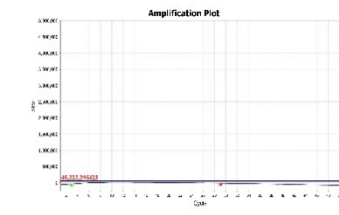

■  $C_{T,amp} = 1$

98

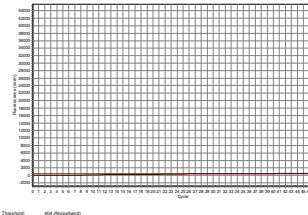

Threshold: 500 (Normalized)  
Baseline settings: automatic, DR correction OFF

99

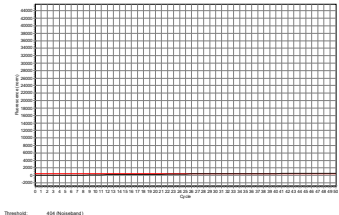

Threshold: 416 (Normalized)  
Baseline settings: automatic, DR correction OFF

100



# SLC45A2-AMACR-PROSTATE-BLOOD SAMPLE 101-120

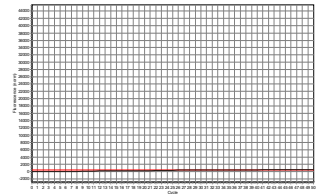

Threshold: 454 (Nonstandard)  
Baseline settings: automatic, DR correction OFF

## 101

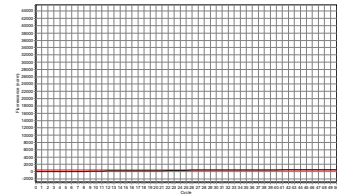

Threshold: 454 (Nonstandard)  
Baseline settings: automatic, DR correction OFF

## 102

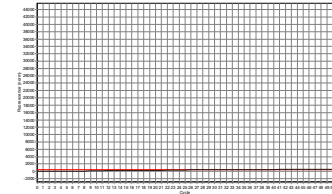

Threshold: 454 (Nonstandard)  
Baseline settings: automatic, DR correction OFF

## 103

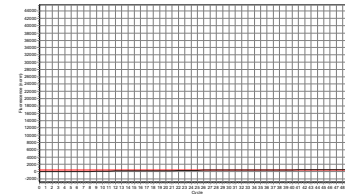

Threshold: 454 (Nonstandard)  
Baseline settings: automatic, DR correction OFF

## 104

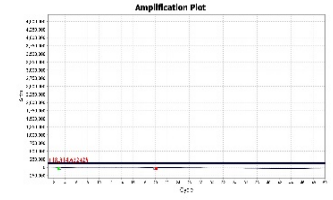

Threshold: 454 (Nonstandard)  
Baseline settings: automatic, DR correction OFF

## 105

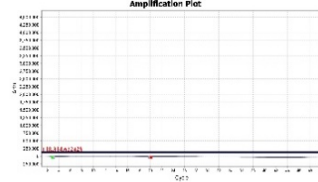

Threshold: 454 (Nonstandard)  
Baseline settings: automatic, DR correction OFF

## 106

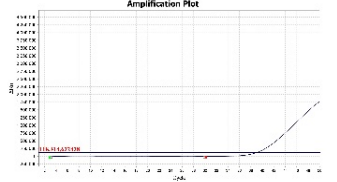

Threshold: 454 (Nonstandard)  
Baseline settings: automatic, DR correction OFF

## 107

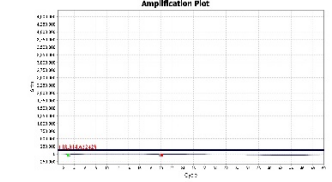

Threshold: 454 (Nonstandard)  
Baseline settings: automatic, DR correction OFF

## 108

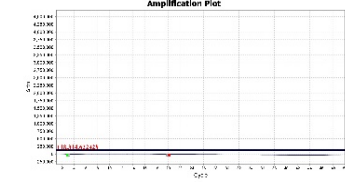

Threshold: 454 (Nonstandard)  
Baseline settings: automatic, DR correction OFF

## 109

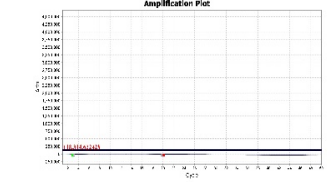

Threshold: 454 (Nonstandard)  
Baseline settings: automatic, DR correction OFF

## 110

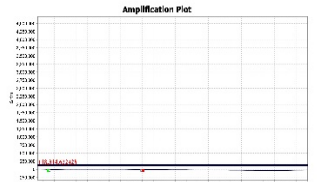

Threshold: 454 (Nonstandard)  
Baseline settings: automatic, DR correction OFF

## 111

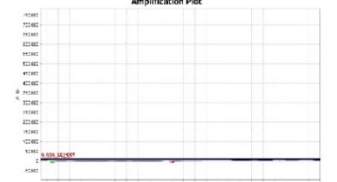

Threshold: 454 (Nonstandard)  
Baseline settings: automatic, DR correction OFF

## 111

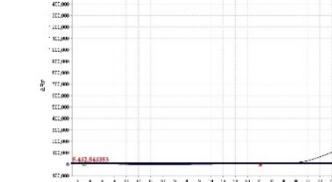

Threshold: 454 (Nonstandard)  
Baseline settings: automatic, DR correction OFF

## 113

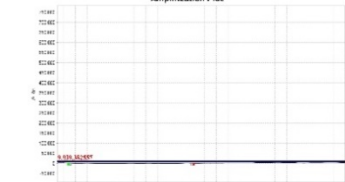

Threshold: 454 (Nonstandard)  
Baseline settings: automatic, DR correction OFF

## 114

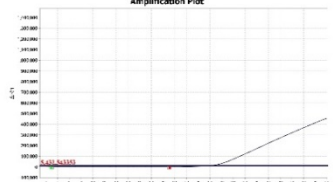

Threshold: 454 (Nonstandard)  
Baseline settings: automatic, DR correction OFF

## 115

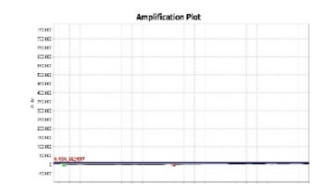

Threshold: 454 (Nonstandard)  
Baseline settings: automatic, DR correction OFF

## 116

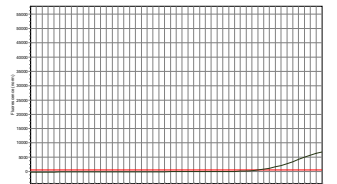

Threshold: 454 (Nonstandard)  
Baseline settings: automatic, DR correction OFF

## 117

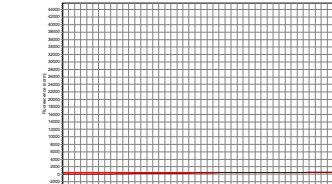

Threshold: 454 (Nonstandard)  
Baseline settings: automatic, DR correction OFF

## 118

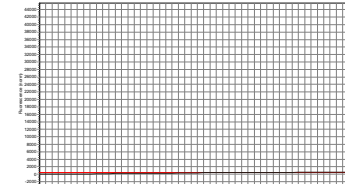

Threshold: 454 (Nonstandard)  
Baseline settings: automatic, DR correction OFF

## 119

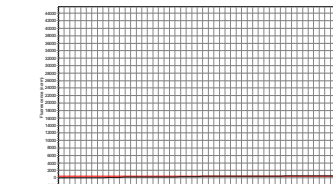

Threshold: 454 (Nonstandard)  
Baseline settings: automatic, DR correction OFF

## 120



# SLC45A2-AMACR-PROSTATE-BLOOD SAMPLE 121-140

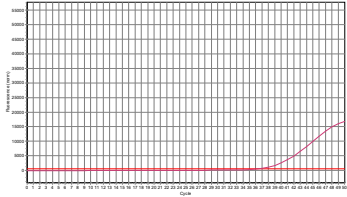

Threshold: 467 (Nonlinear)  
Baseline settings: automatic, DR correction OFF

121

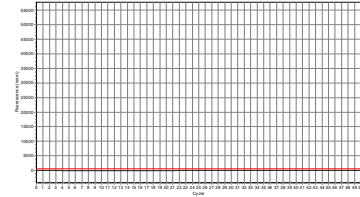

Threshold: 467 (Nonlinear)  
Baseline settings: automatic, DR correction OFF

122

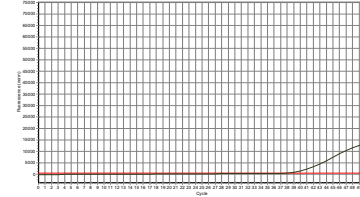

Threshold: 514 (Nonlinear)  
Baseline settings: automatic, DR correction OFF

123

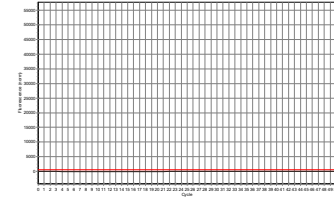

Threshold: 467 (Nonlinear)  
Baseline settings: automatic, DR correction OFF

124

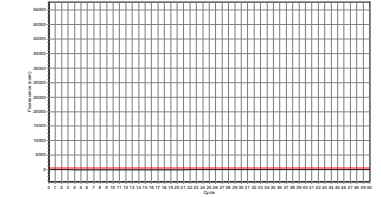

Threshold: 607 (Nonlinear)  
Baseline settings: automatic, DR correction OFF

125

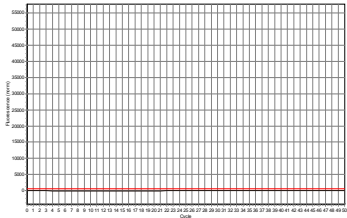

Threshold: 467 (Nonlinear)  
Baseline settings: automatic, DR correction OFF

126

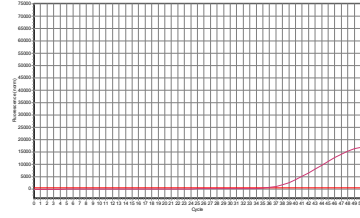

Threshold: 514 (Nonlinear)  
Baseline settings: automatic, DR correction OFF

127

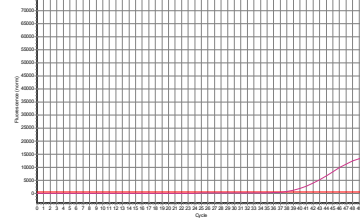

Threshold: 514 (Nonlinear)  
Baseline settings: automatic, DR correction OFF

128

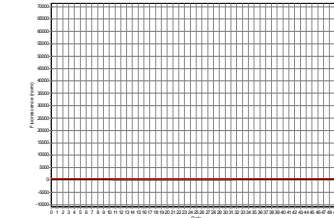

Threshold: 600 (Nonlinear)  
Baseline settings: automatic, DR correction OFF

129

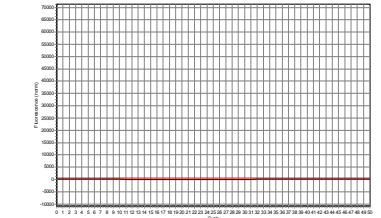

Threshold: 600 (Nonlinear)  
Baseline settings: automatic, DR correction OFF

130

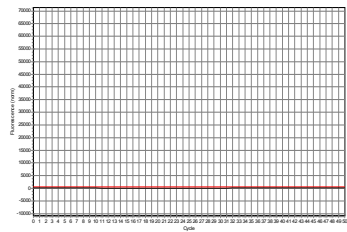

Threshold: 600 (Nonlinear)  
Baseline settings: automatic, DR correction OFF

131

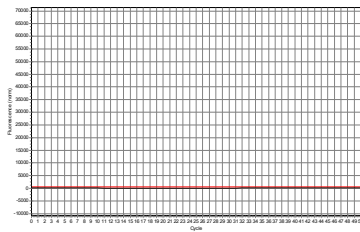

Threshold: 600 (Nonlinear)  
Baseline settings: automatic, DR correction OFF

132

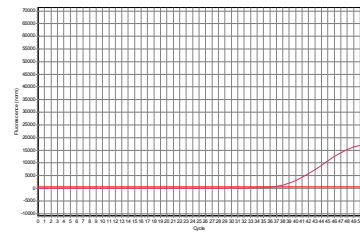

Threshold: 600 (Nonlinear)  
Baseline settings: automatic, DR correction OFF

133

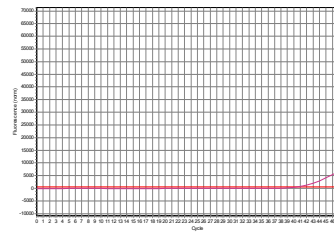

Threshold: 600 (Nonlinear)  
Baseline settings: automatic, DR correction OFF

134

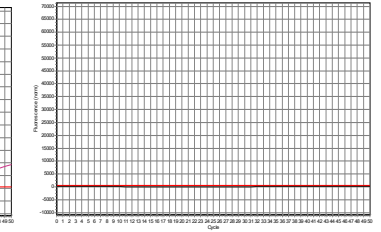

Threshold: 600 (Nonlinear)  
Baseline settings: automatic, DR correction OFF

135

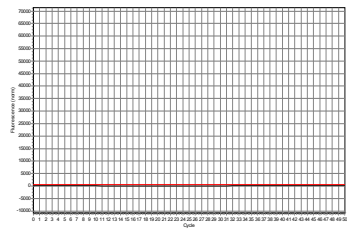

Threshold: 600 (Nonlinear)  
Baseline settings: automatic, DR correction OFF

136

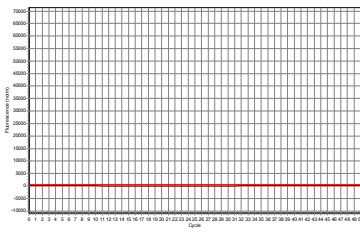

Threshold: 600 (Nonlinear)  
Baseline settings: automatic, DR correction OFF

137

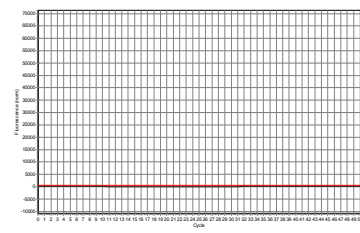

Threshold: 600 (Nonlinear)  
Baseline settings: automatic, DR correction OFF

138

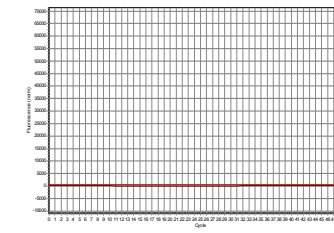

Threshold: 600 (Nonlinear)  
Baseline settings: automatic, DR correction OFF

139

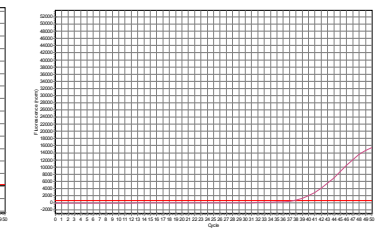

Threshold: 600 (Nonlinear)  
Baseline settings: automatic, DR correction OFF

140

# SLC45A2-AMACR-PROSTATE-BLOOD SAMPLE 141-150

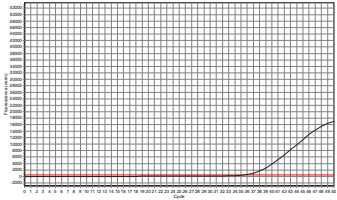

Threshold: 452 (Nucleband)  
Baseline settings: automatic, DR correction OFF

141

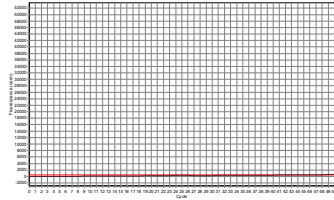

Threshold: 452 (Nucleband)  
Baseline settings: automatic, DR correction OFF

142

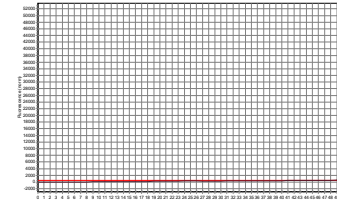

Threshold: 452 (Nucleband)  
Baseline settings: automatic, DR correction OFF

143

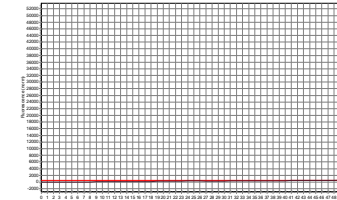

Threshold: 452 (Nucleband)  
Baseline settings: automatic, DR correction OFF

144

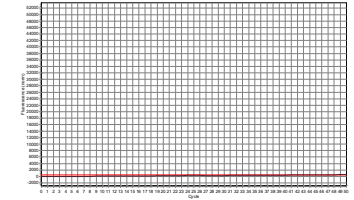

Threshold: 452 (Nucleband)  
Baseline settings: automatic, DR correction OFF

145

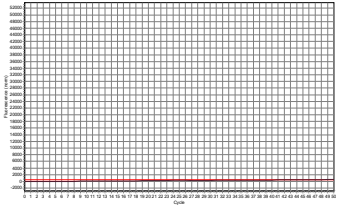

Threshold: 452 (Nucleband)  
Baseline settings: automatic, DR correction OFF

146

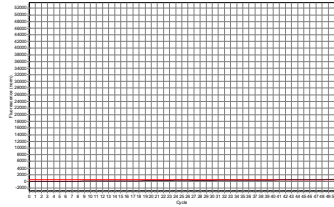

Threshold: 452 (Nucleband)  
Baseline settings: automatic, DR correction OFF

147

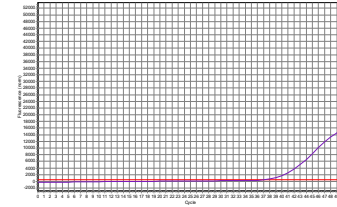

Threshold: 452 (Nucleband)  
Baseline settings: automatic, DR correction OFF

148

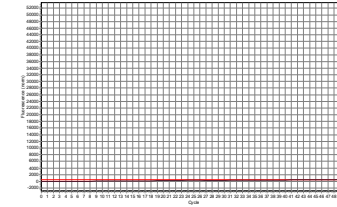

Threshold: 452 (Nucleband)  
Baseline settings: automatic, DR correction OFF

149

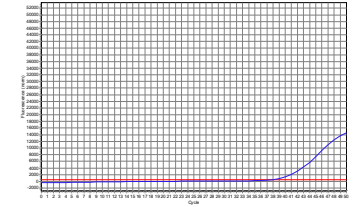

Threshold: 452 (Nucleband)  
Baseline settings: automatic, DR correction OFF

150

# Supplemental figure 7

## TMEM135-CCDC67 fusion detection TMEM135-CCDC67-PROSTATE-BLOOD SAMPLE 1-20

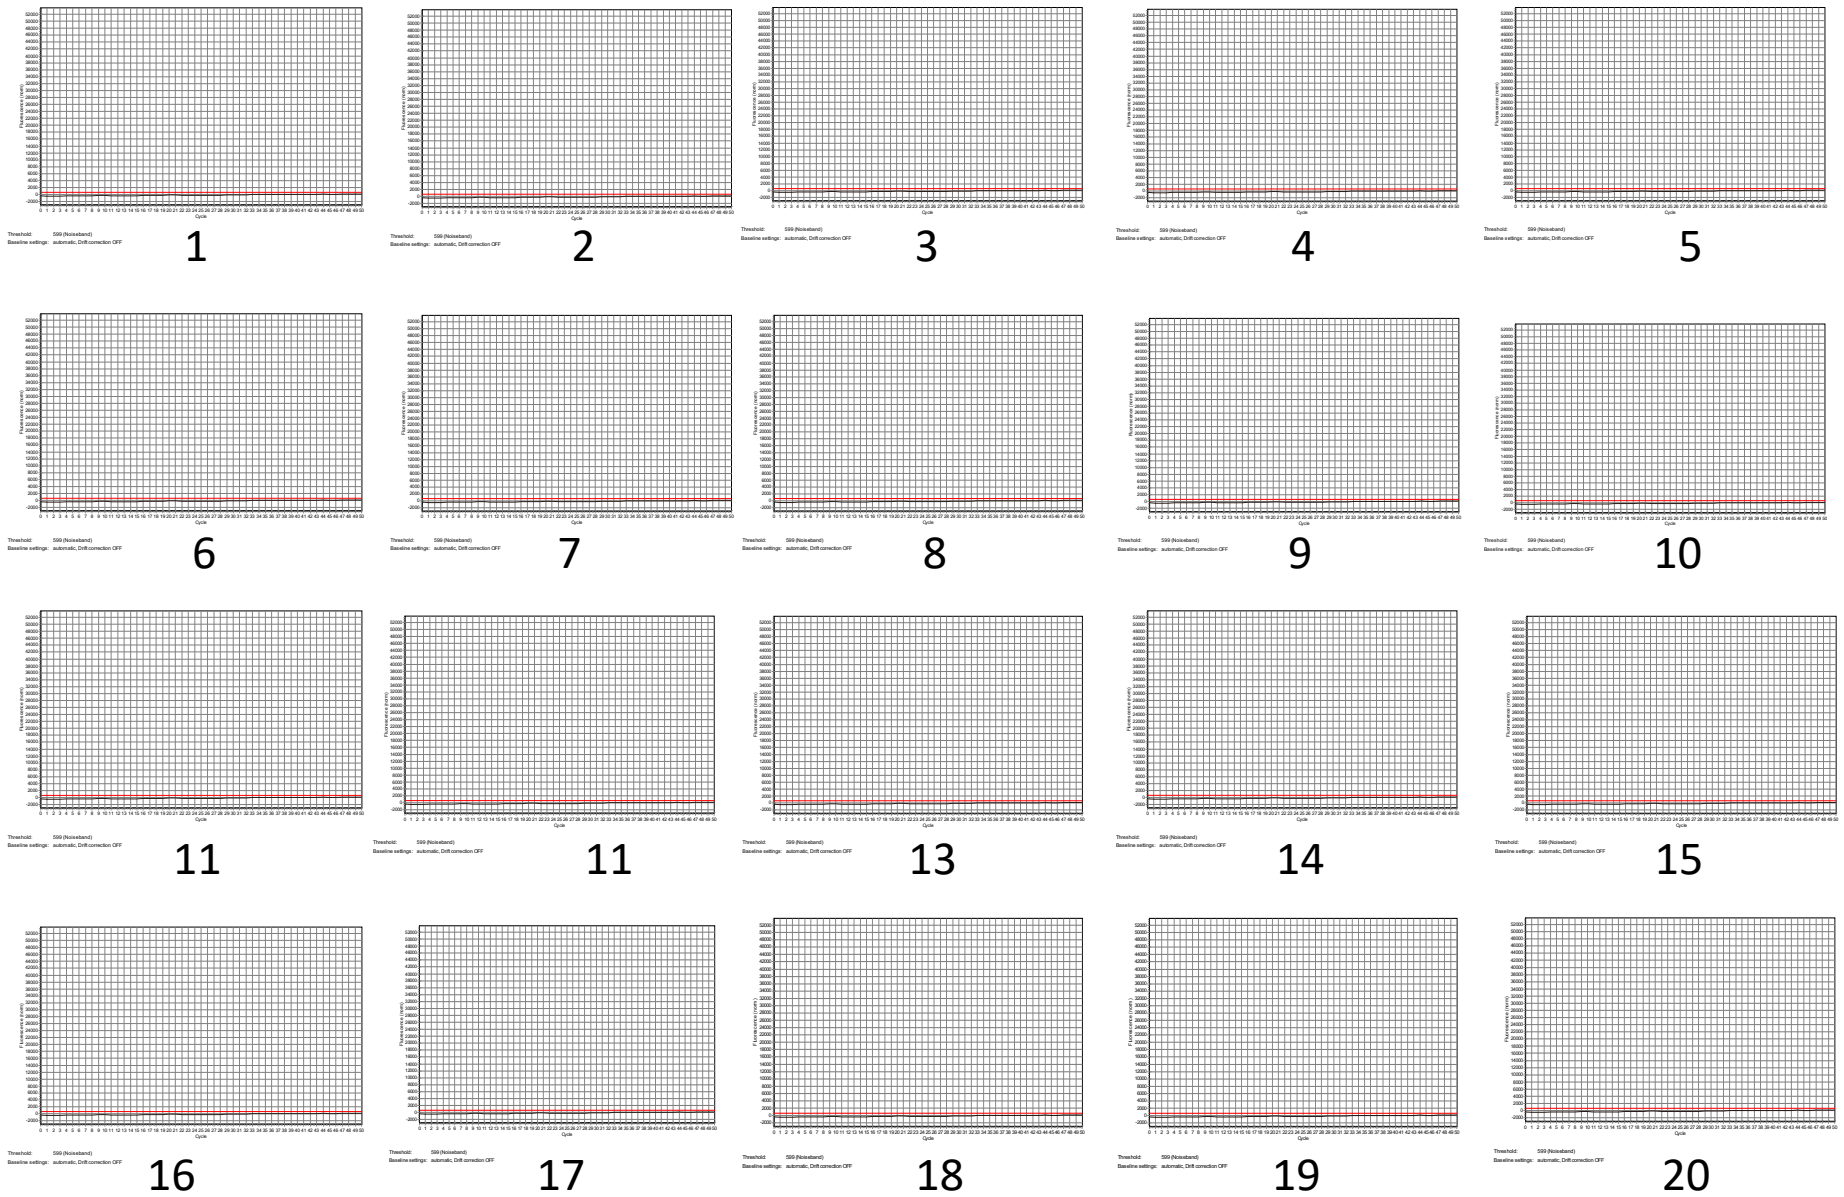

# TMEM135-CCDC67-PROSTATE-BLOOD SAMPLE 21-40

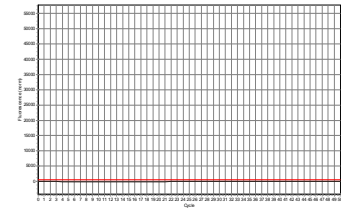

Threshold: 487 (None/and)  
Baseline settings: automatic, DR correction OFF

**21**

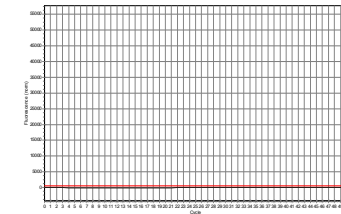

Threshold: 487 (None/and)  
Baseline settings: automatic, DR correction OFF

**22**

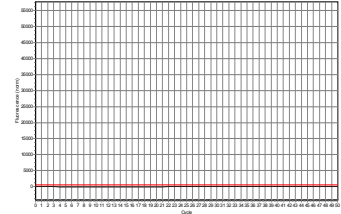

Threshold: 487 (None/and)  
Baseline settings: automatic, DR correction OFF

**23**

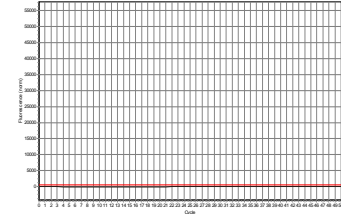

Threshold: 487 (None/and)  
Baseline settings: automatic, DR correction OFF

**24**

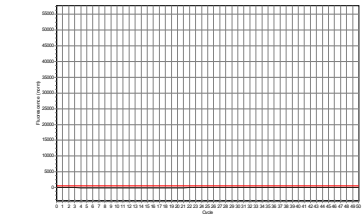

Threshold: 487 (None/and)  
Baseline settings: automatic, DR correction OFF

**25**

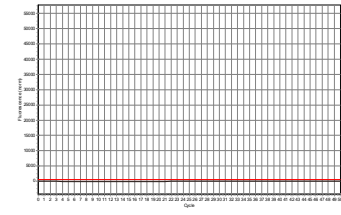

Threshold: 487 (None/and)  
Baseline settings: automatic, DR correction OFF

**26**

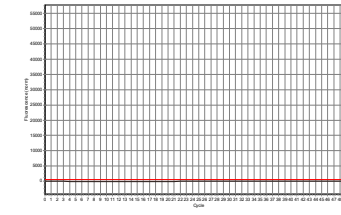

Threshold: 487 (None/and)  
Baseline settings: automatic, DR correction OFF

**27**

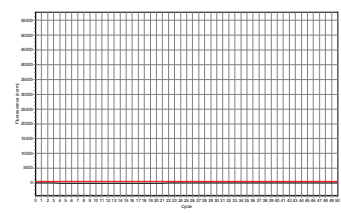

Threshold: 487 (None/and)  
Baseline settings: automatic, DR correction OFF

**28**

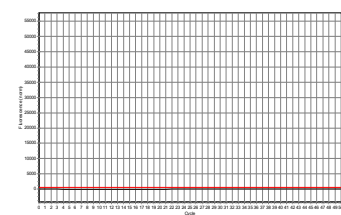

Threshold: 487 (None/and)  
Baseline settings: automatic, DR correction OFF

**29**

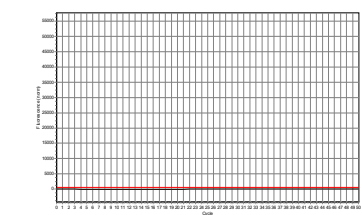

Threshold: 487 (None/and)  
Baseline settings: automatic, DR correction OFF

**30**

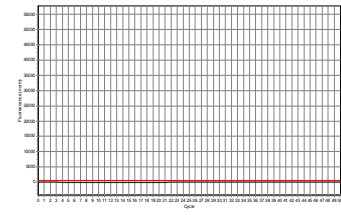

Threshold: 487 (None/and)  
Baseline settings: automatic, DR correction OFF

**31**

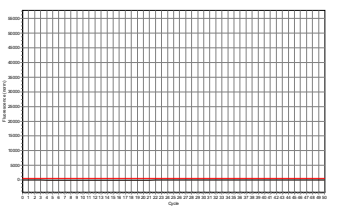

Threshold: 487 (None/and)  
Baseline settings: automatic, DR correction OFF

**32**

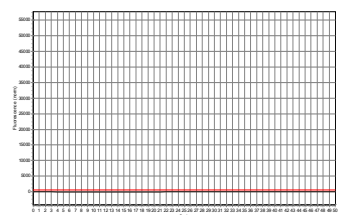

Threshold: 487 (None/and)  
Baseline settings: automatic, DR correction OFF

**33**

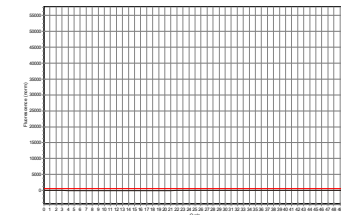

Threshold: 487 (None/and)  
Baseline settings: automatic, DR correction OFF

**34**

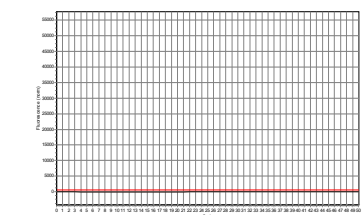

Threshold: 487 (None/and)  
Baseline settings: automatic, DR correction OFF

**35**

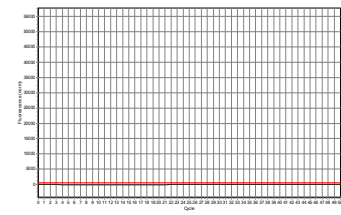

Threshold: 487 (None/and)  
Baseline settings: automatic, DR correction OFF

**36**

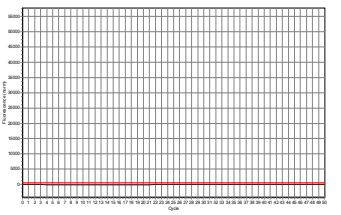

Threshold: 487 (None/and)  
Baseline settings: automatic, DR correction OFF

**37**

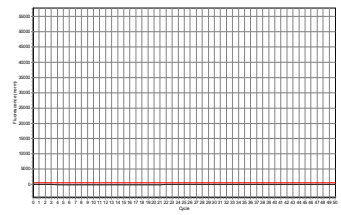

Threshold: 487 (None/and)  
Baseline settings: automatic, DR correction OFF

**38**

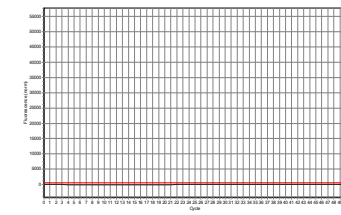

Threshold: 487 (None/and)  
Baseline settings: automatic, DR correction OFF

**39**

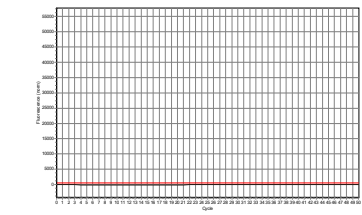

Threshold: 487 (None/and)  
Baseline settings: automatic, DR correction OFF

**40**

# TMEM135-CCDC67-PROSTATE-BLOOD SAMPLE 41-60

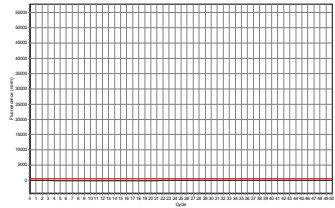

Threshold: 487 (Nonsat)  
Baseline settings: automatic, DR correction OFF

41

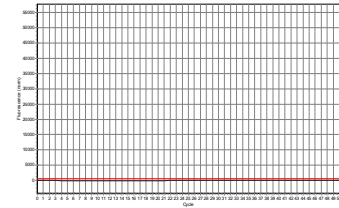

Threshold: 487 (Nonsat)  
Baseline settings: automatic, DR correction OFF

42

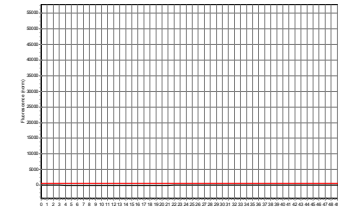

Threshold: 487 (Nonsat)  
Baseline settings: automatic, DR correction OFF

43

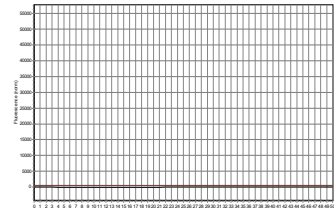

Threshold: 487 (Nonsat)  
Baseline settings: automatic, DR correction OFF

44

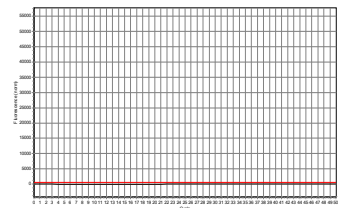

Threshold: 487 (Nonsat)  
Baseline settings: automatic, DR correction OFF

45

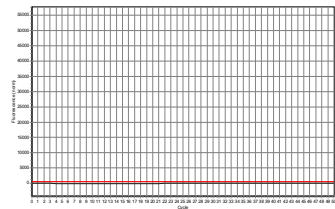

Threshold: 487 (Nonsat)  
Baseline settings: automatic, DR correction OFF

46

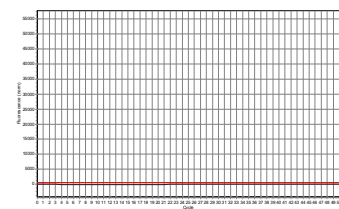

Threshold: 487 (Nonsat)  
Baseline settings: automatic, DR correction OFF

47

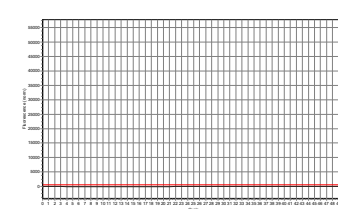

Threshold: 487 (Nonsat)  
Baseline settings: automatic, DR correction OFF

47

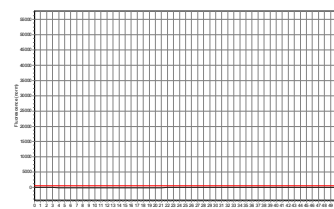

Threshold: 487 (Nonsat)  
Baseline settings: automatic, DR correction OFF

49

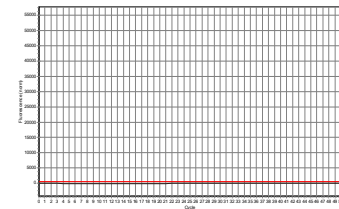

Threshold: 487 (Nonsat)  
Baseline settings: automatic, DR correction OFF

50

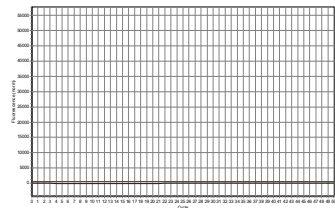

Threshold: 487 (Nonsat)  
Baseline settings: automatic, DR correction OFF

51

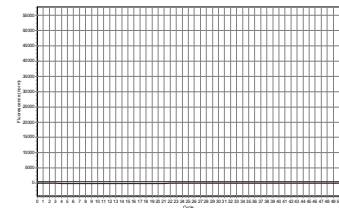

Threshold: 487 (Nonsat)  
Baseline settings: automatic, DR correction OFF

52

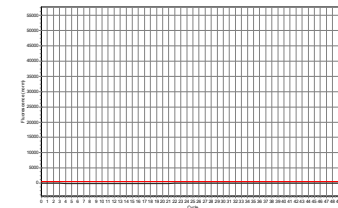

Threshold: 487 (Nonsat)  
Baseline settings: automatic, DR correction OFF

53

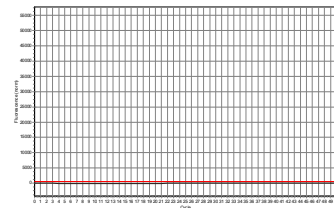

Threshold: 487 (Nonsat)  
Baseline settings: automatic, DR correction OFF

54

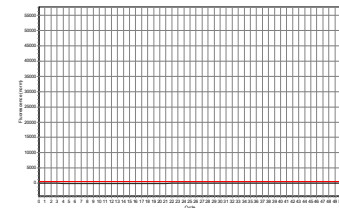

Threshold: 487 (Nonsat)  
Baseline settings: automatic, DR correction OFF

55

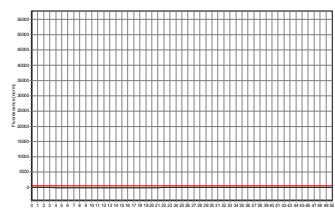

Threshold: 487 (Nonsat)  
Baseline settings: automatic, DR correction OFF

56

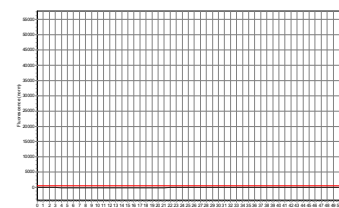

Threshold: 487 (Nonsat)  
Baseline settings: automatic, DR correction OFF

57

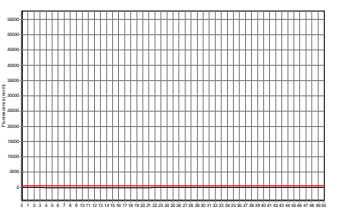

Threshold: 487 (Nonsat)  
Baseline settings: automatic, DR correction OFF

58

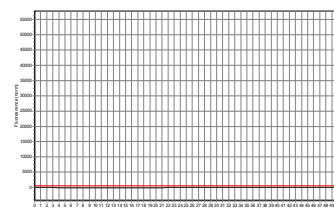

Threshold: 487 (Nonsat)  
Baseline settings: automatic, DR correction OFF

59

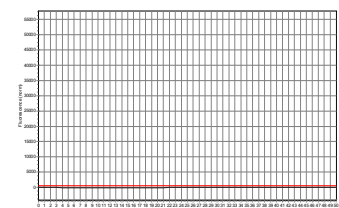

Threshold: 487 (Nonsat)  
Baseline settings: automatic, DR correction OFF

60

# TMEM135-CCDC67-PROSTATE-BLOOD SAMPLE 61-80

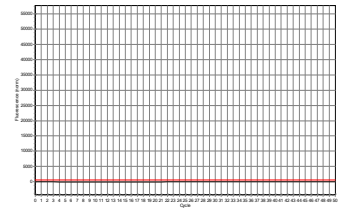

Threshold: 487 (Nonstandard)  
Baseline settings: automatic, DR correction OFF

61

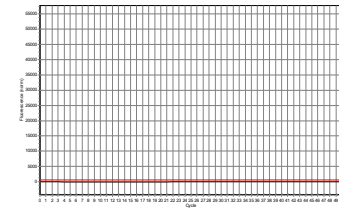

Threshold: 487 (Nonstandard)  
Baseline settings: automatic, DR correction OFF

62

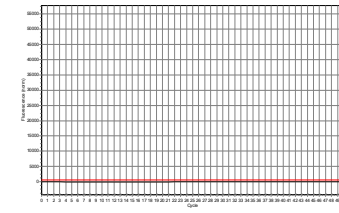

Threshold: 487 (Nonstandard)  
Baseline settings: automatic, DR correction OFF

63

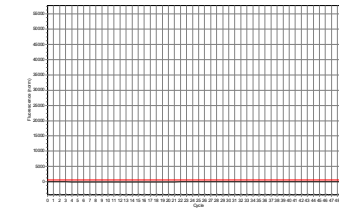

Threshold: 487 (Nonstandard)  
Baseline settings: automatic, DR correction OFF

64

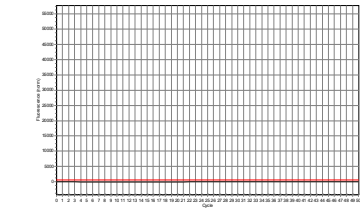

Threshold: 487 (Nonstandard)  
Baseline settings: automatic, DR correction OFF

65

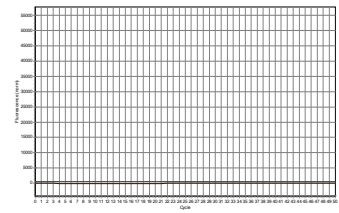

Threshold: 487 (Nonstandard)  
Baseline settings: automatic, DR correction OFF

66

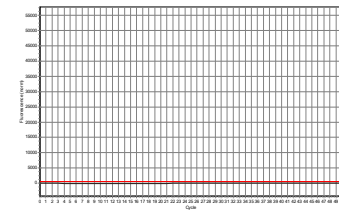

Threshold: 487 (Nonstandard)  
Baseline settings: automatic, DR correction OFF

67

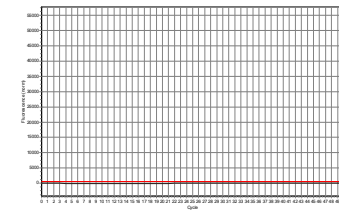

Threshold: 487 (Nonstandard)  
Baseline settings: automatic, DR correction OFF

68

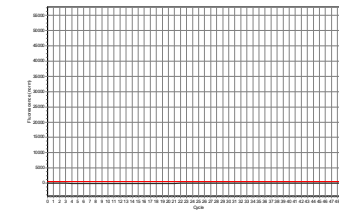

Threshold: 487 (Nonstandard)  
Baseline settings: automatic, DR correction OFF

69

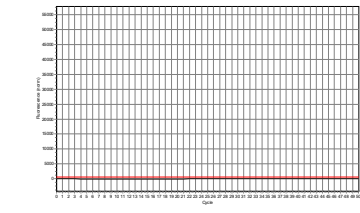

Threshold: 487 (Nonstandard)  
Baseline settings: automatic, DR correction OFF

70

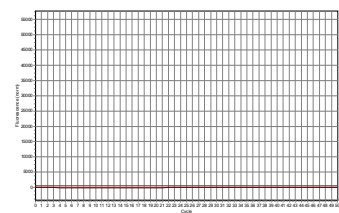

Threshold: 487 (Nonstandard)  
Baseline settings: automatic, DR correction OFF

71

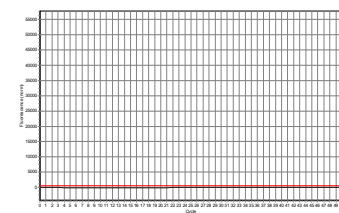

Threshold: 487 (Nonstandard)  
Baseline settings: automatic, DR correction OFF

72

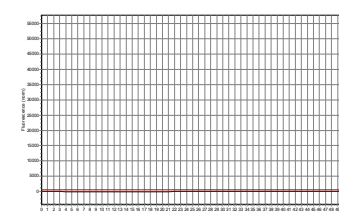

Threshold: 487 (Nonstandard)  
Baseline settings: automatic, DR correction OFF

73

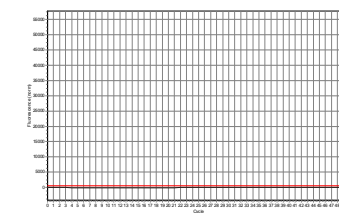

Threshold: 487 (Nonstandard)  
Baseline settings: automatic, DR correction OFF

74

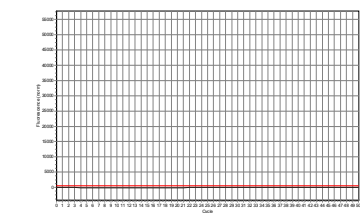

Threshold: 487 (Nonstandard)  
Baseline settings: automatic, DR correction OFF

75

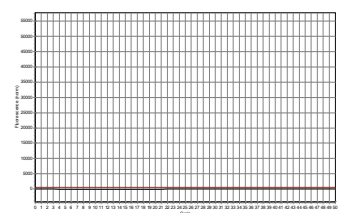

Threshold: 487 (Nonstandard)  
Baseline settings: automatic, DR correction OFF

76

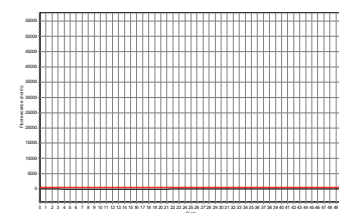

Threshold: 487 (Nonstandard)  
Baseline settings: automatic, DR correction OFF

77

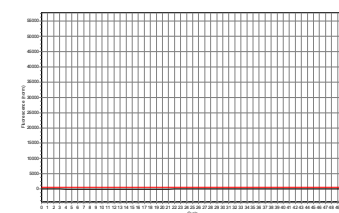

Threshold: 487 (Nonstandard)  
Baseline settings: automatic, DR correction OFF

78

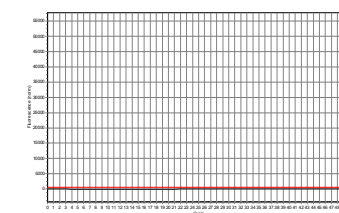

Threshold: 487 (Nonstandard)  
Baseline settings: automatic, DR correction OFF

79

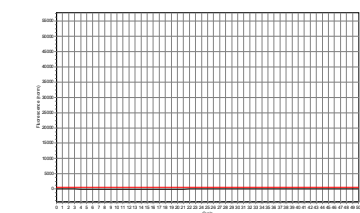

Threshold: 487 (Nonstandard)  
Baseline settings: automatic, DR correction OFF

80

# TMEM135-CCDC67-PROSTATE-BLOOD SAMPLE 81-100

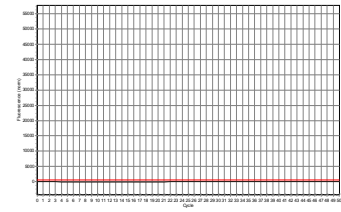

Threshold: 487 (Nonstandard)  
Baseline settings: automatic, Drift correction OFF

81

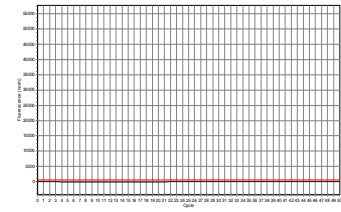

Threshold: 487 (Nonstandard)  
Baseline settings: automatic, Drift correction OFF

82

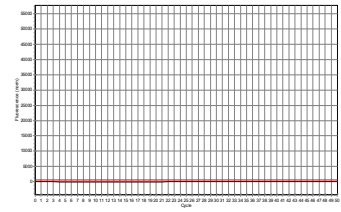

Threshold: 487 (Nonstandard)  
Baseline settings: automatic, Drift correction OFF

83

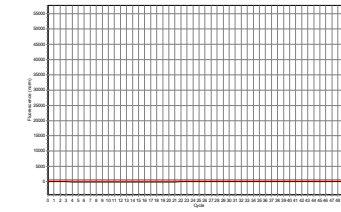

Threshold: 487 (Nonstandard)  
Baseline settings: automatic, Drift correction OFF

84

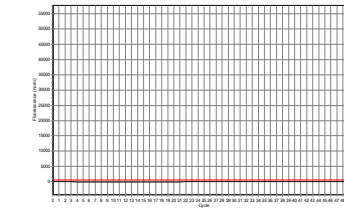

Threshold: 487 (Nonstandard)  
Baseline settings: automatic, Drift correction OFF

85

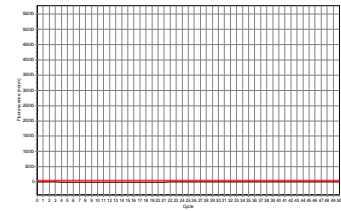

Threshold: 487 (Nonstandard)  
Baseline settings: automatic, Drift correction OFF

86

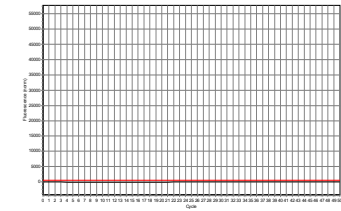

Threshold: 487 (Nonstandard)  
Baseline settings: automatic, Drift correction OFF

87

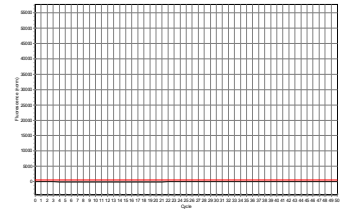

Threshold: 487 (Nonstandard)  
Baseline settings: automatic, Drift correction OFF

88

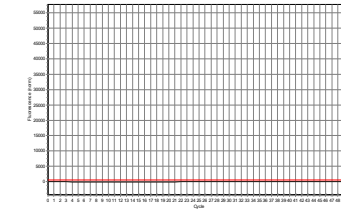

Threshold: 487 (Nonstandard)  
Baseline settings: automatic, Drift correction OFF

89

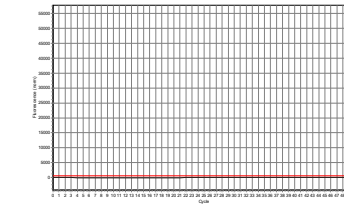

Threshold: 487 (Nonstandard)  
Baseline settings: automatic, Drift correction OFF

90

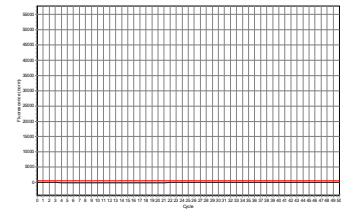

Threshold: 487 (Nonstandard)  
Baseline settings: automatic, Drift correction OFF

91

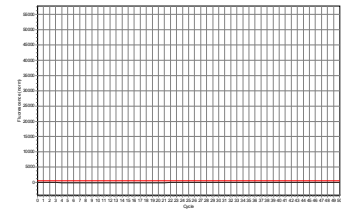

Threshold: 487 (Nonstandard)  
Baseline settings: automatic, Drift correction OFF

92

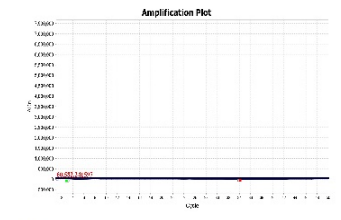

Threshold: 487 (Nonstandard)  
Baseline settings: automatic, Drift correction OFF

93

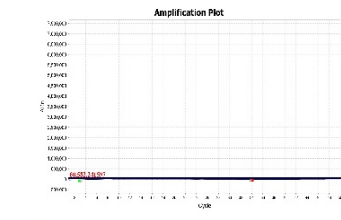

Threshold: 487 (Nonstandard)  
Baseline settings: automatic, Drift correction OFF

94

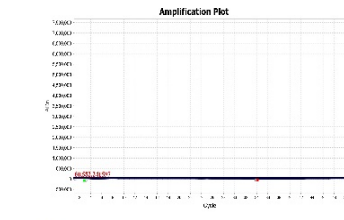

Threshold: 487 (Nonstandard)  
Baseline settings: automatic, Drift correction OFF

95

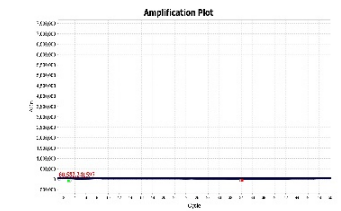

Threshold: 487 (Nonstandard)  
Baseline settings: automatic, Drift correction OFF

96

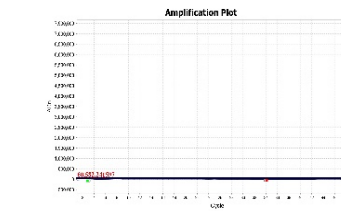

Threshold: 487 (Nonstandard)  
Baseline settings: automatic, Drift correction OFF

97

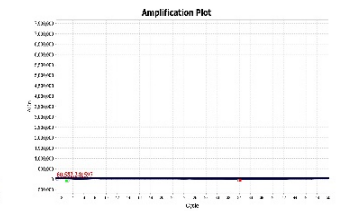

Threshold: 487 (Nonstandard)  
Baseline settings: automatic, Drift correction OFF

98

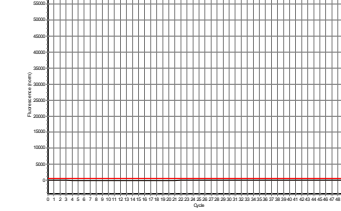

Threshold: 487 (Nonstandard)  
Baseline settings: automatic, Drift correction OFF

99

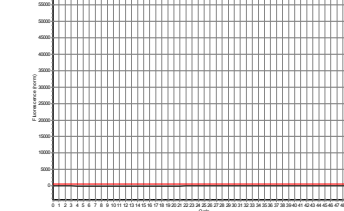

Threshold: 487 (Nonstandard)  
Baseline settings: automatic, Drift correction OFF

100



# TMEM135-CCDC67-PROSTATE-BLOOD SAMPLE 101-120

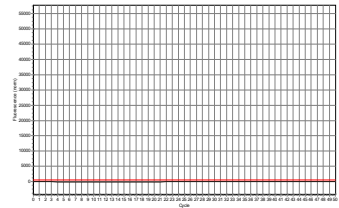

Threshold: 487 (Nonstandard)  
Baseline settings: automatic, Drift correction: OFF

## 101

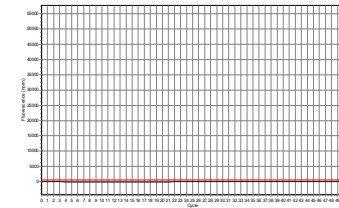

Threshold: 487 (Nonstandard)  
Baseline settings: automatic, Drift correction: OFF

## 102

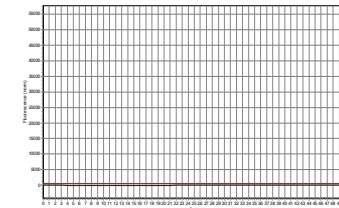

Threshold: 487 (Nonstandard)  
Baseline settings: automatic, Drift correction: OFF

## 103

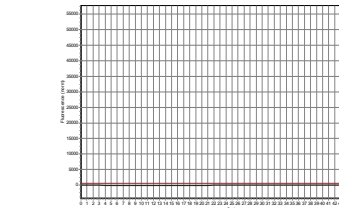

Threshold: 487 (Nonstandard)  
Baseline settings: automatic, Drift correction: OFF

## 104

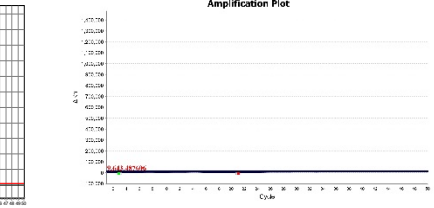

Target 1

## 105

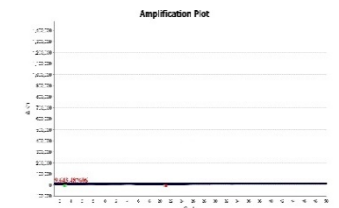

Target 1

## 106

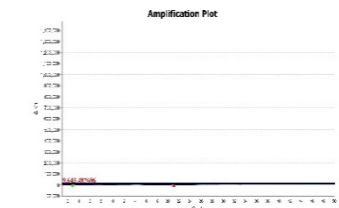

Target 1

## 107

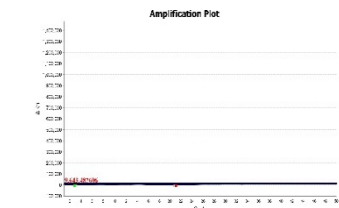

Target 1

## 108

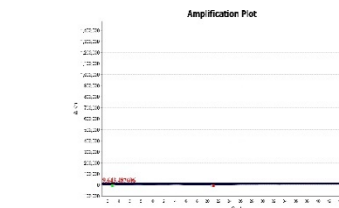

Target 1

## 109

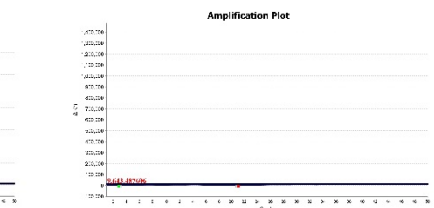

Target 1

## 110

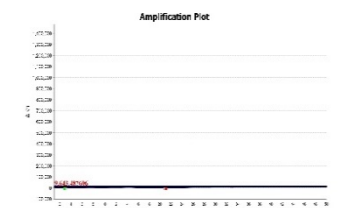

Target 1

## 111

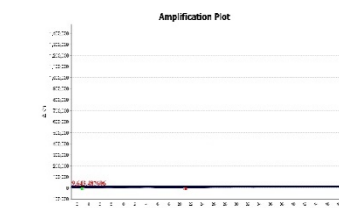

Target 1

## 111

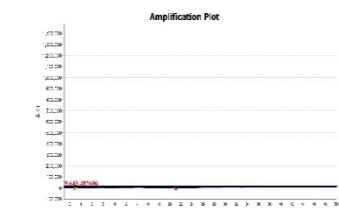

Target 1

## 113

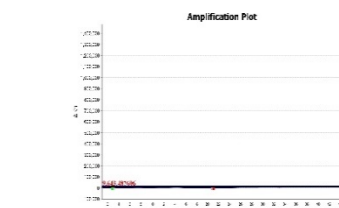

Target 1

## 114

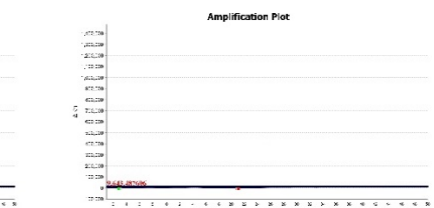

Target 1

## 115

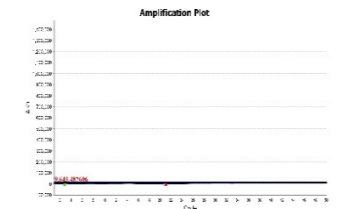

Target 1

## 116

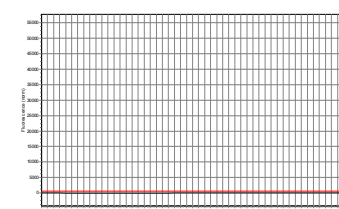

Threshold: 487 (Nonstandard)  
Baseline settings: automatic, Drift correction: OFF

## 117

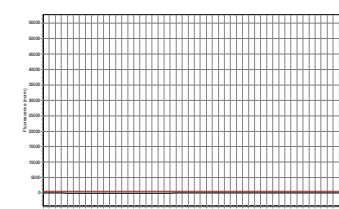

Threshold: 487 (Nonstandard)  
Baseline settings: automatic, Drift correction: OFF

## 118

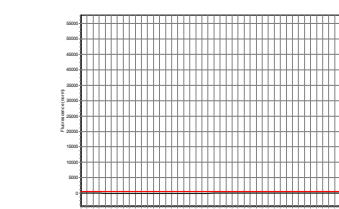

Threshold: 487 (Nonstandard)  
Baseline settings: automatic, Drift correction: OFF

## 119

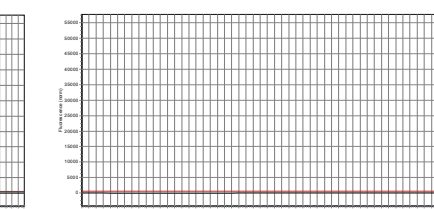

Threshold: 487 (Nonstandard)  
Baseline settings: automatic, Drift correction: OFF

## 120



# TMEM135-CCDC67-PROSTATE-BLOOD SAMPLE 121-140

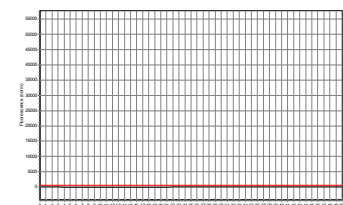

Threshold: 487 (Nonstandard)  
Baseline settings: automatic, DRB correction OFF

121

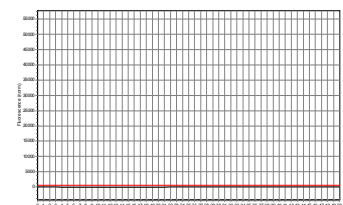

Threshold: 487 (Nonstandard)  
Baseline settings: automatic, DRB correction OFF

122

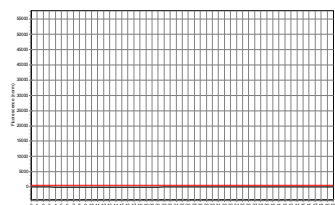

Threshold: 487 (Nonstandard)  
Baseline settings: automatic, DRB correction OFF

123

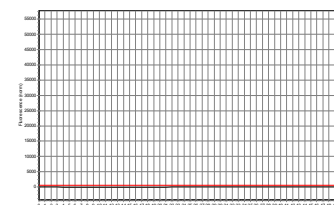

Threshold: 487 (Nonstandard)  
Baseline settings: automatic, DRB correction OFF

124

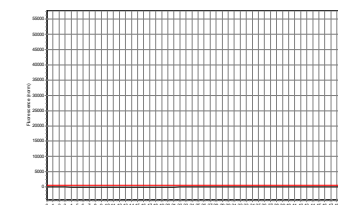

Threshold: 487 (Nonstandard)  
Baseline settings: automatic, DRB correction OFF

125

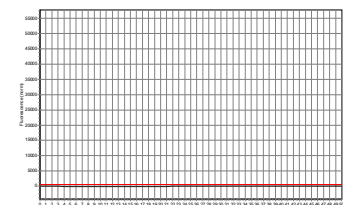

Threshold: 487 (Nonstandard)  
Baseline settings: automatic, DRB correction OFF

126

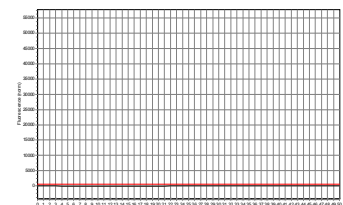

Threshold: 487 (Nonstandard)  
Baseline settings: automatic, DRB correction OFF

127

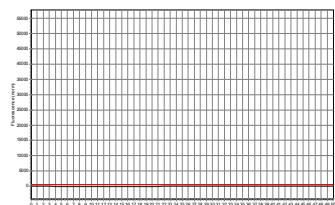

Threshold: 487 (Nonstandard)  
Baseline settings: automatic, DRB correction OFF

128

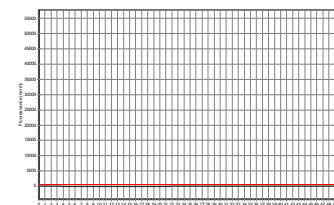

Threshold: 487 (Nonstandard)  
Baseline settings: automatic, DRB correction OFF

129

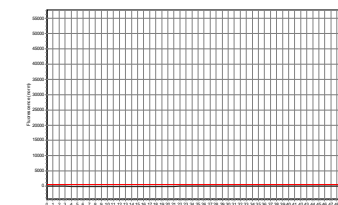

Threshold: 487 (Nonstandard)  
Baseline settings: automatic, DRB correction OFF

130

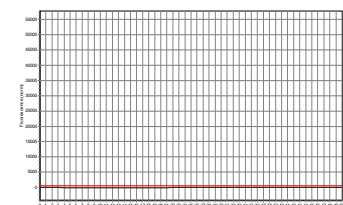

Threshold: 487 (Nonstandard)  
Baseline settings: automatic, DRB correction OFF

131

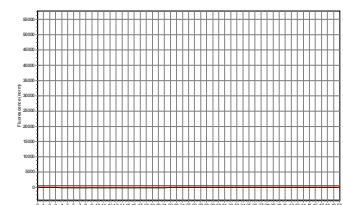

Threshold: 487 (Nonstandard)  
Baseline settings: automatic, DRB correction OFF

132

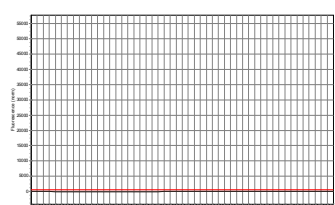

Threshold: 487 (Nonstandard)  
Baseline settings: automatic, DRB correction OFF

133

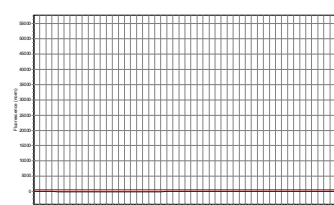

Threshold: 487 (Nonstandard)  
Baseline settings: automatic, DRB correction OFF

134

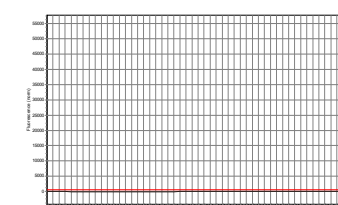

Threshold: 487 (Nonstandard)  
Baseline settings: automatic, DRB correction OFF

135

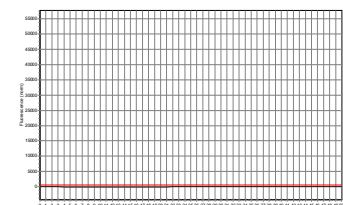

Threshold: 487 (Nonstandard)  
Baseline settings: automatic, DRB correction OFF

136

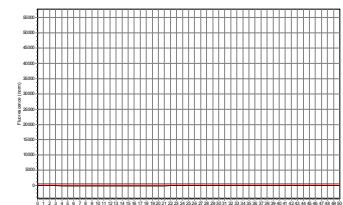

Threshold: 487 (Nonstandard)  
Baseline settings: automatic, DRB correction OFF

137

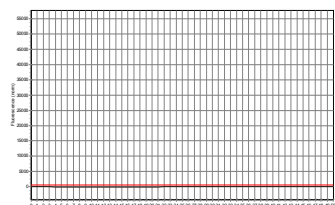

Threshold: 487 (Nonstandard)  
Baseline settings: automatic, DRB correction OFF

138

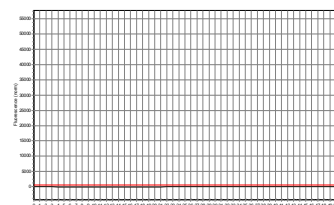

Threshold: 487 (Nonstandard)  
Baseline settings: automatic, DRB correction OFF

139

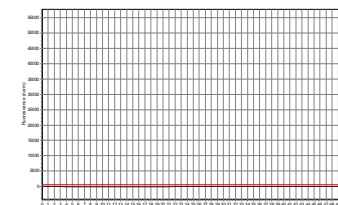

Threshold: 487 (Nonstandard)  
Baseline settings: automatic, DRB correction OFF

140

# TMEM135-CCDC67-PROSTATE-BLOOD SAMPLE 141-150

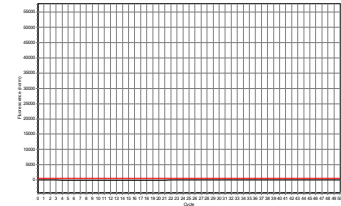

Threshold: 487 (Noisefloor)  
Baseline settings: automatic, DRR correction OFF

141

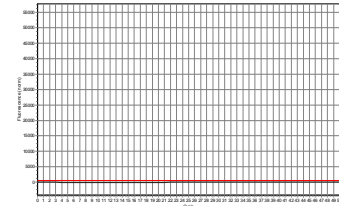

Threshold: 487 (Noisefloor)  
Baseline settings: automatic, DRR correction OFF

142

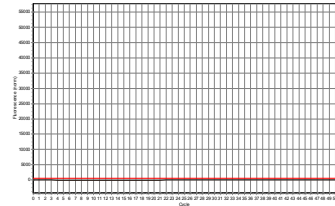

Threshold: 487 (Noisefloor)  
Baseline settings: automatic, DRR correction OFF

143

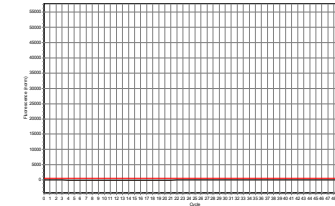

Threshold: 487 (Noisefloor)  
Baseline settings: automatic, DRR correction OFF

144

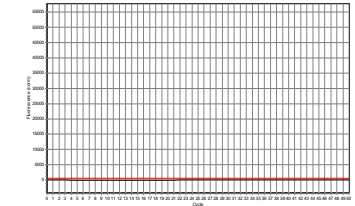

Threshold: 487 (Noisefloor)  
Baseline settings: automatic, DRR correction OFF

145

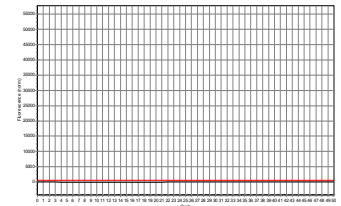

Threshold: 487 (Noisefloor)  
Baseline settings: automatic, DRR correction OFF

146

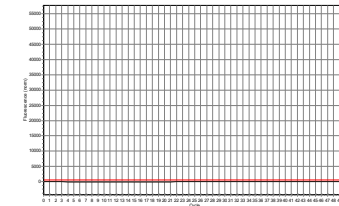

Threshold: 487 (Noisefloor)  
Baseline settings: automatic, DRR correction OFF

147

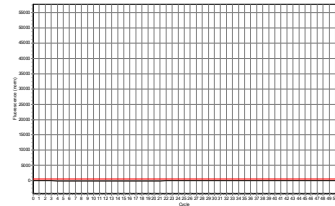

Threshold: 487 (Noisefloor)  
Baseline settings: automatic, DRR correction OFF

148

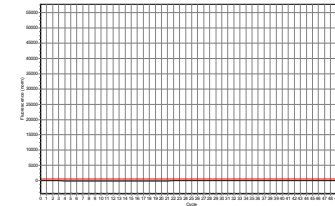

Threshold: 487 (Noisefloor)  
Baseline settings: automatic, DRR correction OFF

149

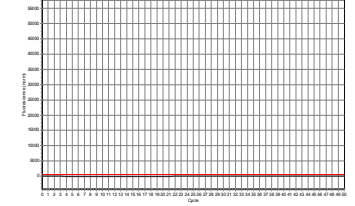

Threshold: 487 (Noisefloor)  
Baseline settings: automatic, DRR correction OFF

150

# Supplemental figure 8

## LRRC59-FLJ60017 fusion detection LRRC59-FLJ60017-PROSTATE-BLOOD SAMPLE 1-20

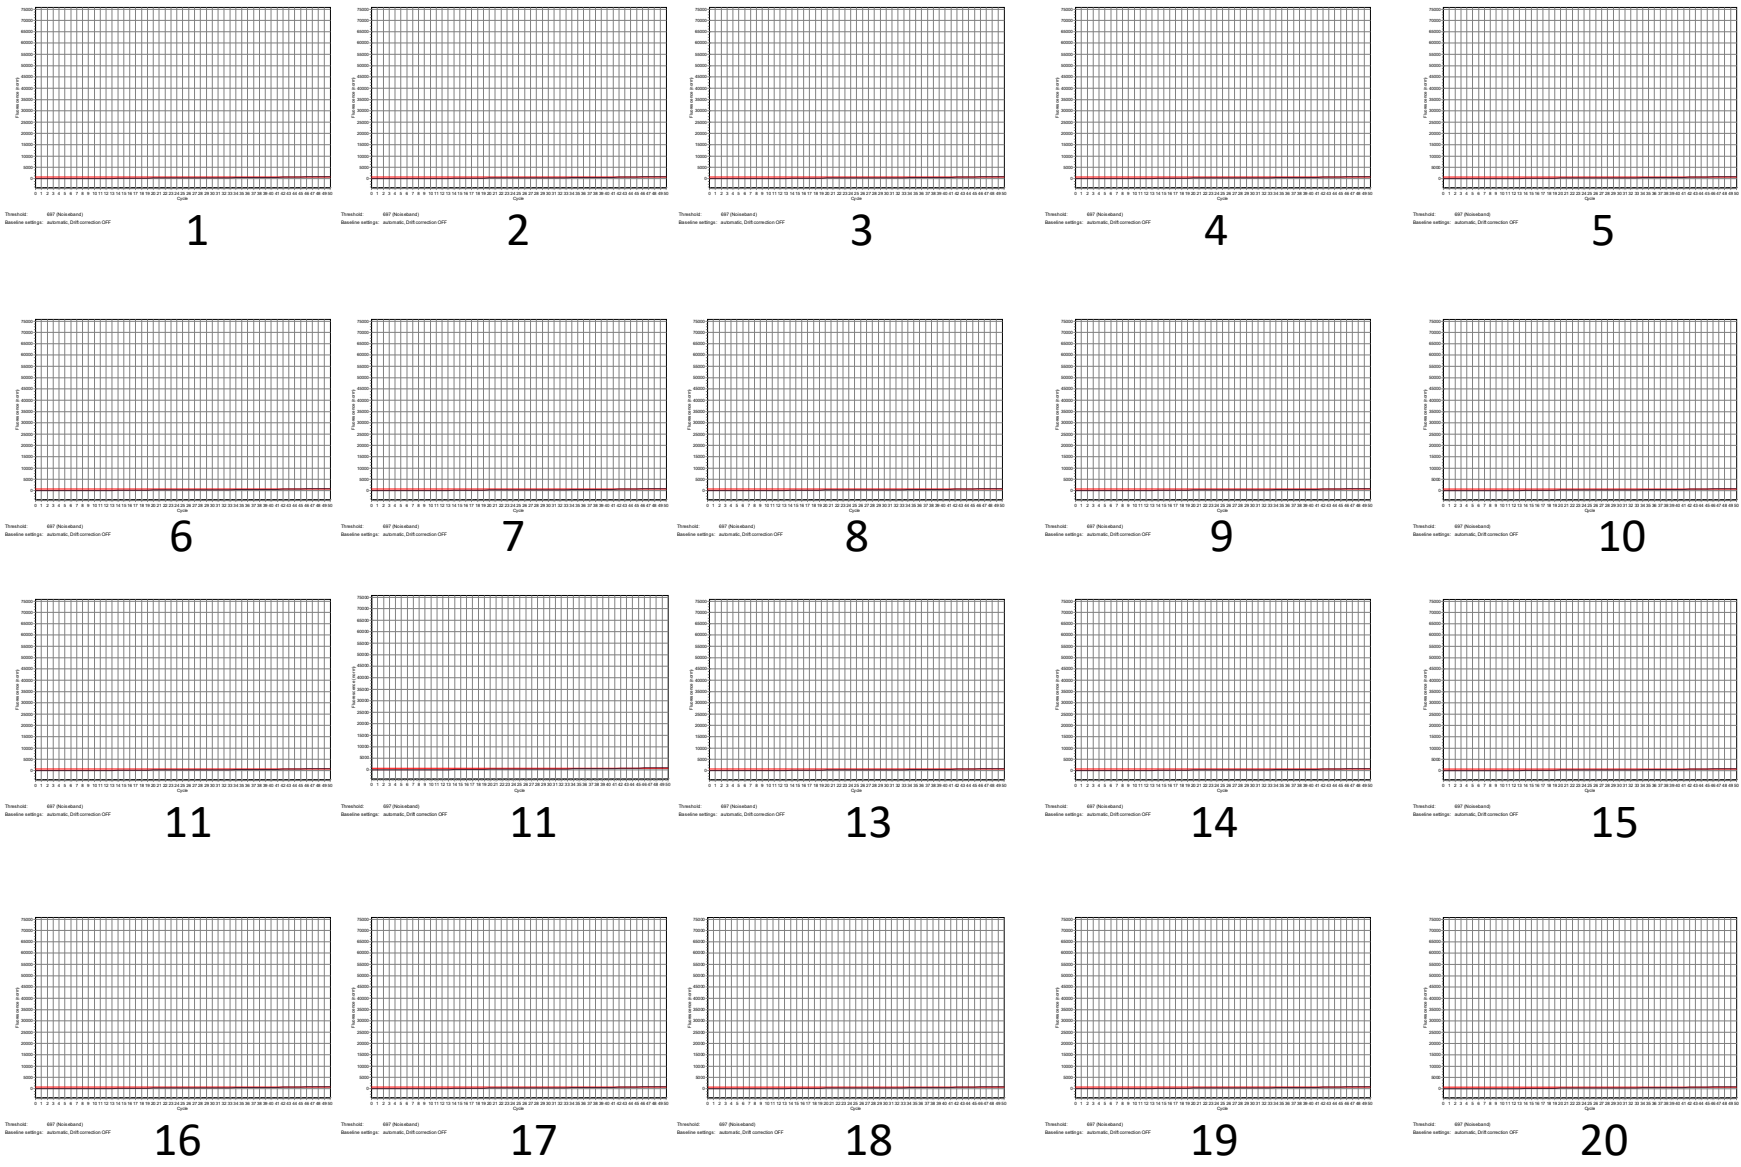

# LRR59-FLJ60017-PROSTATE-BLOOD SAMPLE 21-40

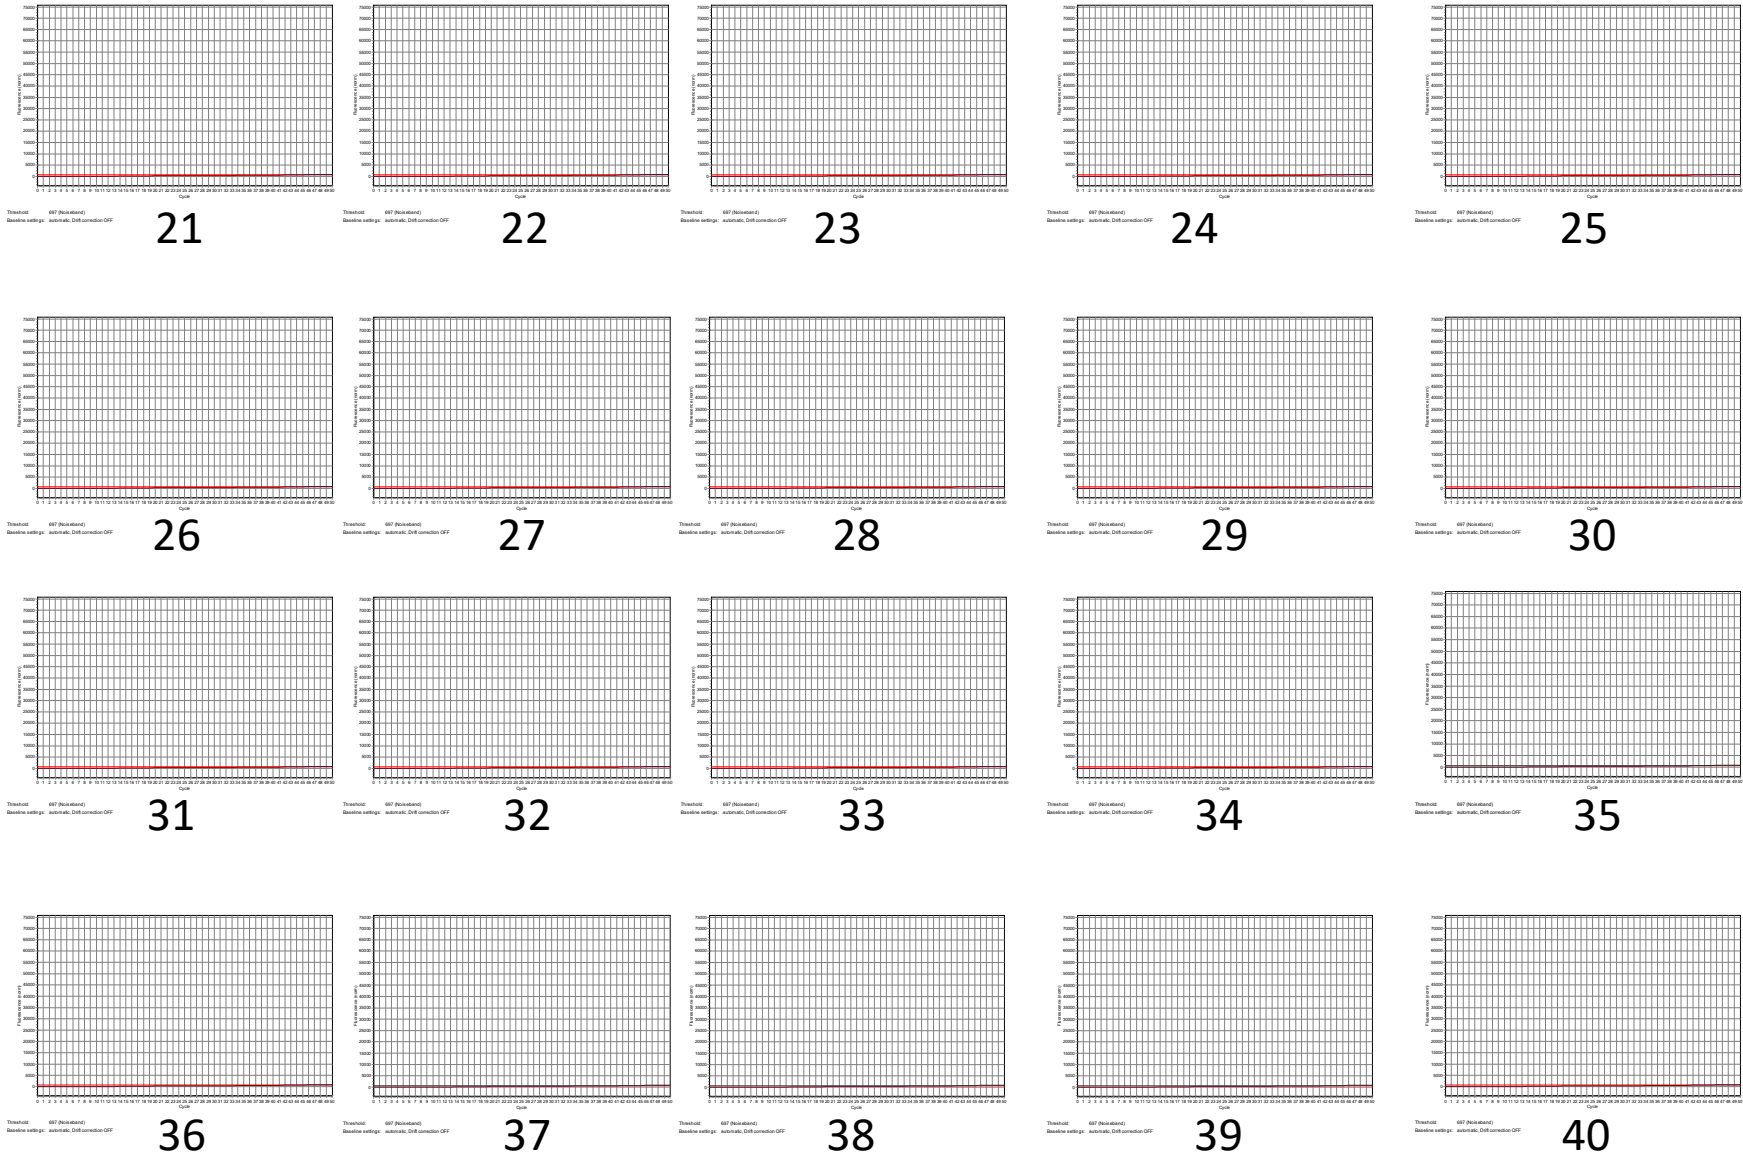

# LRRC-PROSTATE-BLOOD SAMPLE 41-60

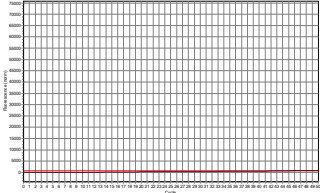

Threshold: 657 (NonMatch)  
Baseline settings: automatic, DRR correction OFF

41

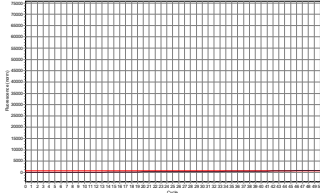

Threshold: 657 (NonMatch)  
Baseline settings: automatic, DRR correction OFF

42

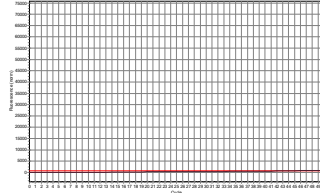

Threshold: 657 (NonMatch)  
Baseline settings: automatic, DRR correction OFF

43

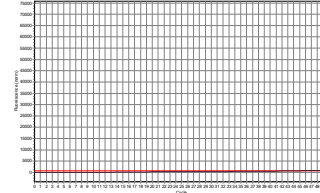

Threshold: 657 (NonMatch)  
Baseline settings: automatic, DRR correction OFF

44

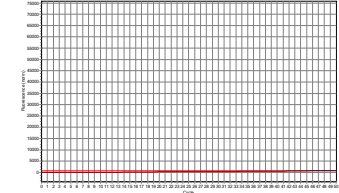

Threshold: 657 (NonMatch)  
Baseline settings: automatic, DRR correction OFF

45

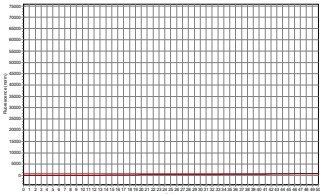

Threshold: 657 (NonMatch)  
Baseline settings: automatic, DRR correction OFF

46

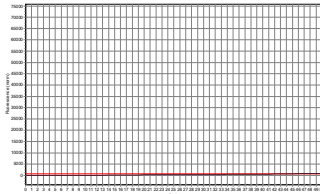

Threshold: 657 (NonMatch)  
Baseline settings: automatic, DRR correction OFF

47

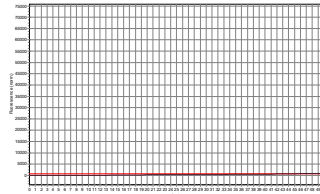

Threshold: 657 (NonMatch)  
Baseline settings: automatic, DRR correction OFF

47

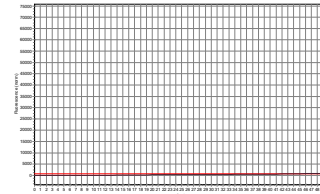

Threshold: 657 (NonMatch)  
Baseline settings: automatic, DRR correction OFF

49

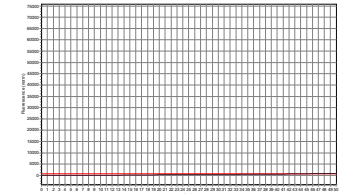

Threshold: 657 (NonMatch)  
Baseline settings: automatic, DRR correction OFF

50

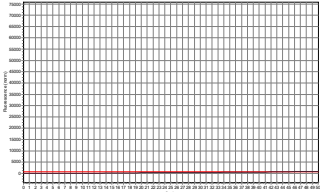

Threshold: 657 (NonMatch)  
Baseline settings: automatic, DRR correction OFF

51

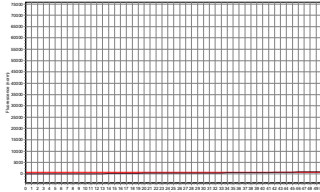

Threshold: 657 (NonMatch)  
Baseline settings: automatic, DRR correction OFF

52

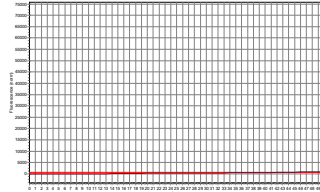

Threshold: 657 (NonMatch)  
Baseline settings: automatic, DRR correction OFF

53

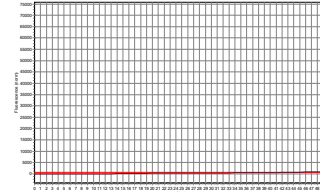

Threshold: 657 (NonMatch)  
Baseline settings: automatic, DRR correction OFF

54

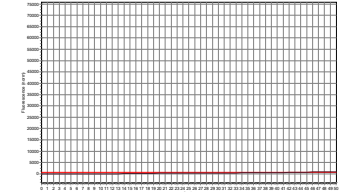

Threshold: 657 (NonMatch)  
Baseline settings: automatic, DRR correction OFF

55

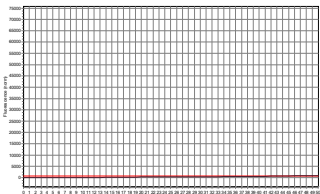

Threshold: 657 (NonMatch)  
Baseline settings: automatic, DRR correction OFF

56

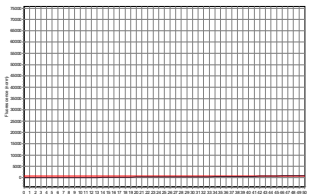

Threshold: 657 (NonMatch)  
Baseline settings: automatic, DRR correction OFF

57

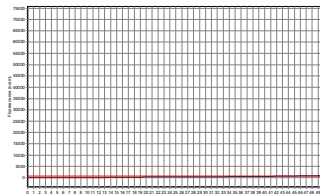

Threshold: 657 (NonMatch)  
Baseline settings: automatic, DRR correction OFF

58

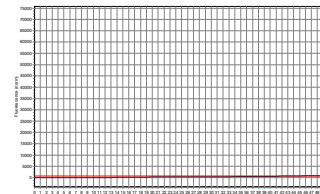

Threshold: 657 (NonMatch)  
Baseline settings: automatic, DRR correction OFF

59

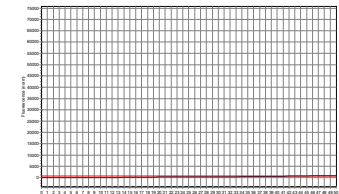

Threshold: 657 (NonMatch)  
Baseline settings: automatic, DRR correction OFF

60

# LRRC-PROSTATE-BLOOD SAMPLE 61-80

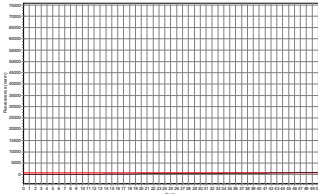

Threshold: 637 (Non-zero)  
Baseline settings: automatic, DR correction OFF

61

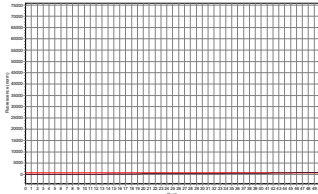

Threshold: 637 (Non-zero)  
Baseline settings: automatic, DR correction OFF

62

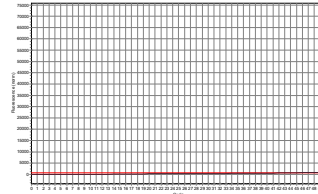

Threshold: 637 (Non-zero)  
Baseline settings: automatic, DR correction OFF

63

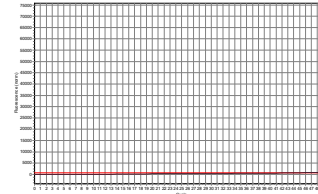

Threshold: 637 (Non-zero)  
Baseline settings: automatic, DR correction OFF

64

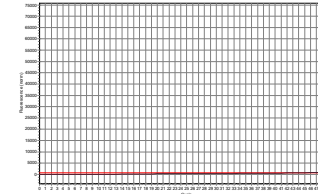

Threshold: 637 (Non-zero)  
Baseline settings: automatic, DR correction OFF

65

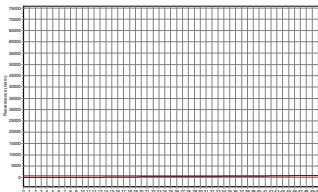

Threshold: 637 (Non-zero)  
Baseline settings: automatic, DR correction OFF

66

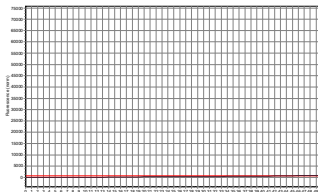

Threshold: 637 (Non-zero)  
Baseline settings: automatic, DR correction OFF

67

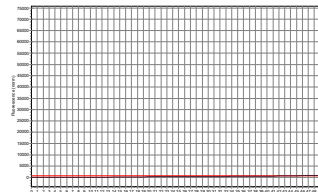

Threshold: 637 (Non-zero)  
Baseline settings: automatic, DR correction OFF

68

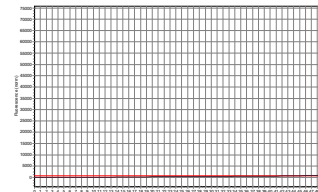

Threshold: 637 (Non-zero)  
Baseline settings: automatic, DR correction OFF

69

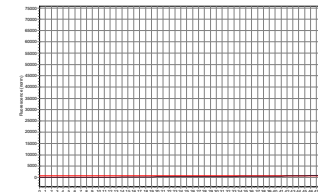

Threshold: 637 (Non-zero)  
Baseline settings: automatic, DR correction OFF

70

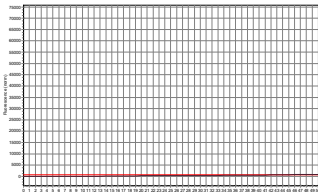

Threshold: 637 (Non-zero)  
Baseline settings: automatic, DR correction OFF

71

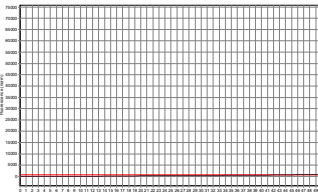

Threshold: 637 (Non-zero)  
Baseline settings: automatic, DR correction OFF

72

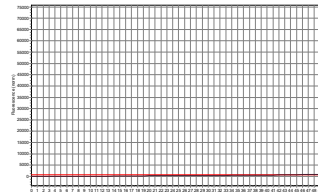

Threshold: 637 (Non-zero)  
Baseline settings: automatic, DR correction OFF

73

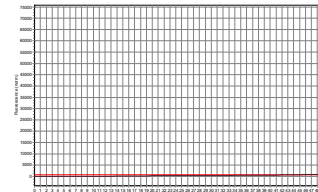

Threshold: 637 (Non-zero)  
Baseline settings: automatic, DR correction OFF

74

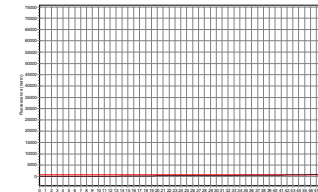

Threshold: 637 (Non-zero)  
Baseline settings: automatic, DR correction OFF

75

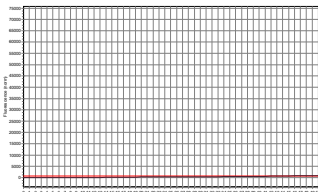

Threshold: 637 (Non-zero)  
Baseline settings: automatic, DR correction OFF

76

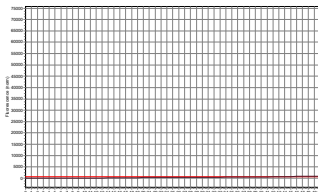

Threshold: 637 (Non-zero)  
Baseline settings: automatic, DR correction OFF

77

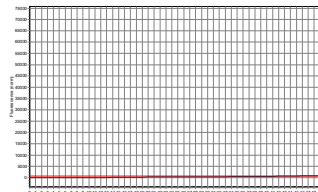

Threshold: 637 (Non-zero)  
Baseline settings: automatic, DR correction OFF

78

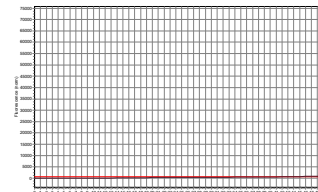

Threshold: 637 (Non-zero)  
Baseline settings: automatic, DR correction OFF

79

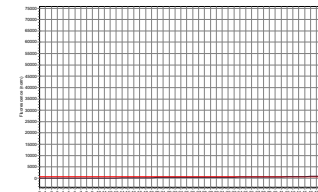

Threshold: 637 (Non-zero)  
Baseline settings: automatic, DR correction OFF

80

# LRRC-PROSTATE-BLOOD SAMPLE 81-100



Threshold: 487 (Noisiband)  
Baseline settings: automatic, DRR correction OFF

81



Threshold: 487 (Noisiband)  
Baseline settings: automatic, DRR correction OFF

82

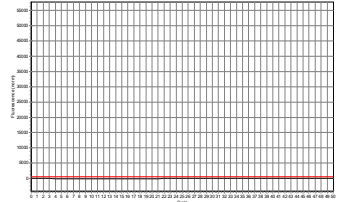

Threshold: 487 (Noisiband)  
Baseline settings: automatic, DRR correction OFF

83

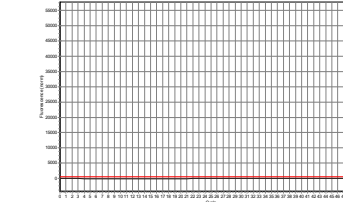

Threshold: 487 (Noisiband)  
Baseline settings: automatic, DRR correction OFF

84

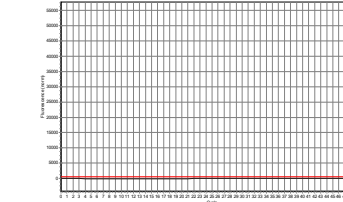

Threshold: 487 (Noisiband)  
Baseline settings: automatic, DRR correction OFF

85

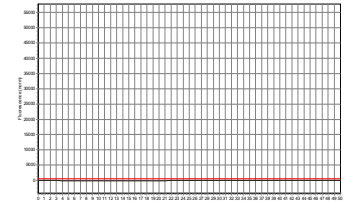

Threshold: 487 (Noisiband)  
Baseline settings: automatic, DRR correction OFF

86

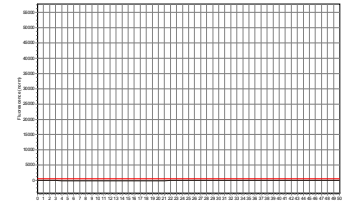

Threshold: 487 (Noisiband)  
Baseline settings: automatic, DRR correction OFF

87

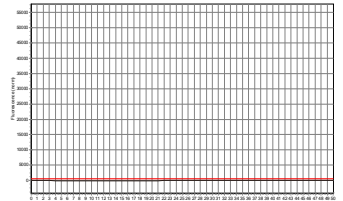

Threshold: 487 (Noisiband)  
Baseline settings: automatic, DRR correction OFF

88

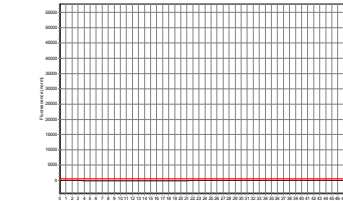

Threshold: 487 (Noisiband)  
Baseline settings: automatic, DRR correction OFF

89

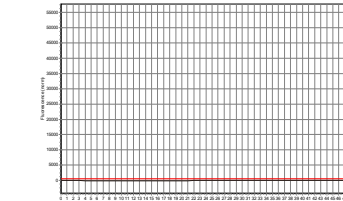

Threshold: 487 (Noisiband)  
Baseline settings: automatic, DRR correction OFF

90

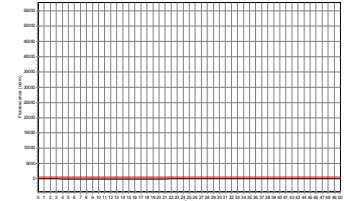

Threshold: 487 (Noisiband)  
Baseline settings: automatic, DRR correction OFF

91

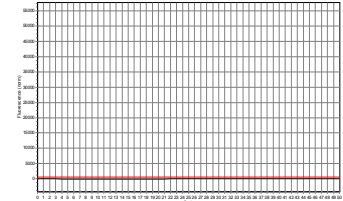

Threshold: 487 (Noisiband)  
Baseline settings: automatic, DRR correction OFF

92

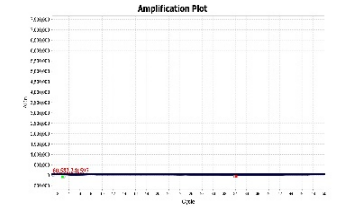

93

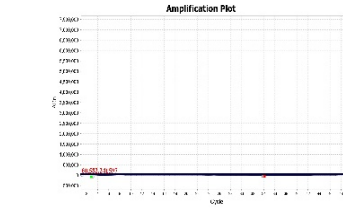

94

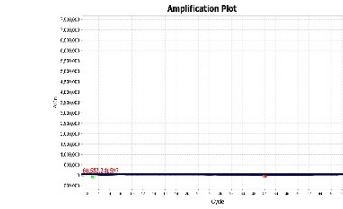

95

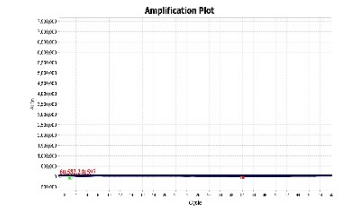

96

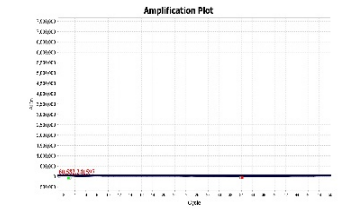

97

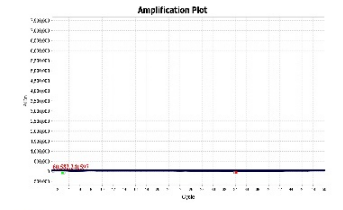

98

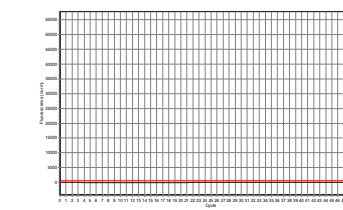

Threshold: 487 (Noisiband)  
Baseline settings: automatic, DRR correction OFF

99

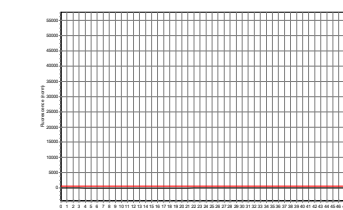

Threshold: 487 (Noisiband)  
Baseline settings: automatic, DRR correction OFF

100

# LRRC-PROSTATE-BLOOD SAMPLE 101-120

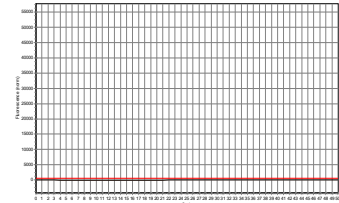

Threshold: 487 (Noiseland)  
Baseline settings: automatic, Drift correction: OFF

101

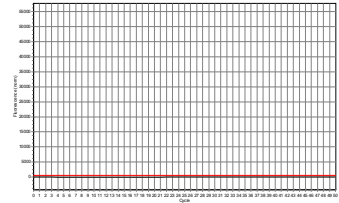

Threshold: 487 (Noiseland)  
Baseline settings: automatic, Drift correction: OFF

102

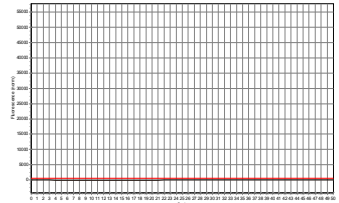

Threshold: 487 (Noiseland)  
Baseline settings: automatic, Drift correction: OFF

103

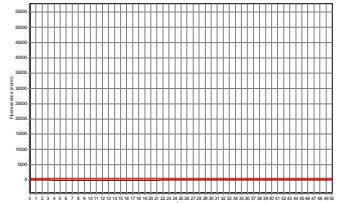

Threshold: 487 (Noiseland)  
Baseline settings: automatic, Drift correction: OFF

104

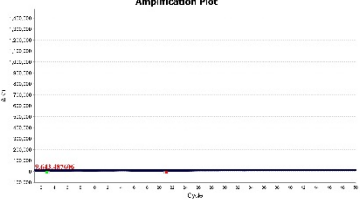

Threshold: 487 (Noiseland)  
Baseline settings: automatic, Drift correction: OFF

105

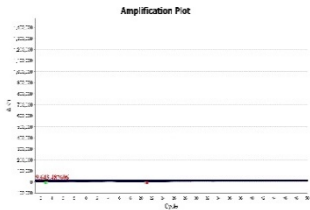

Target 1

106

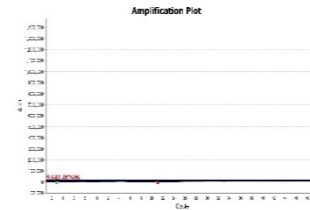

Target 1

107

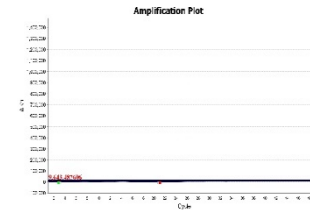

Target 1

108

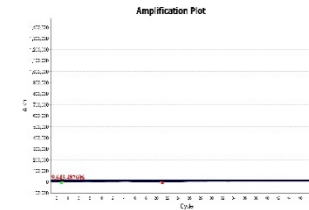

Target 1

109

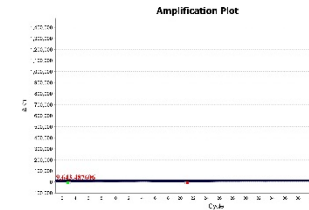

Target 1

110

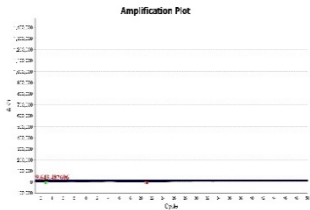

Target 1

111

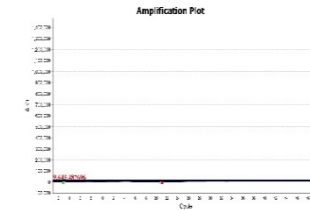

Target 1

112

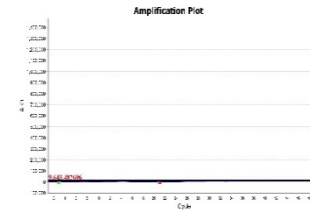

Target 1

113

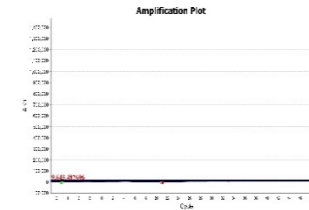

Target 1

114

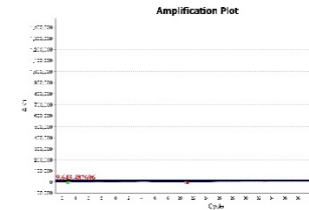

Target 1

115

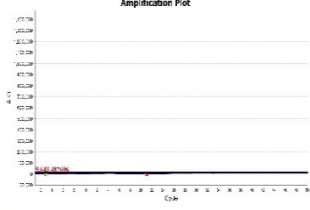

Target 1

116

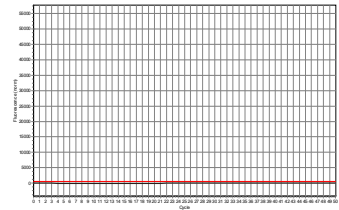

Threshold: 487 (Noiseland)  
Baseline settings: automatic, Drift correction: OFF

117

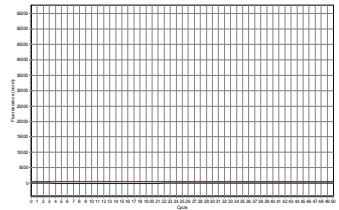

Threshold: 487 (Noiseland)  
Baseline settings: automatic, Drift correction: OFF

118

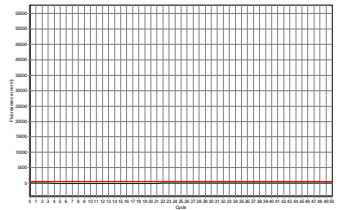

Threshold: 487 (Noiseland)  
Baseline settings: automatic, Drift correction: OFF

119

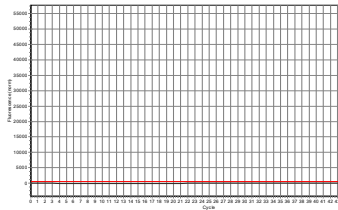

Threshold: 487 (Noiseland)  
Baseline settings: automatic, Drift correction: OFF

120





# LRRC-PROSTATE-BLOOD SAMPLE 141-150

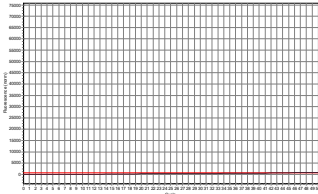

Threshold: 657 (Normal)  
Baseline settings: automatic, DRR correction OFF

141

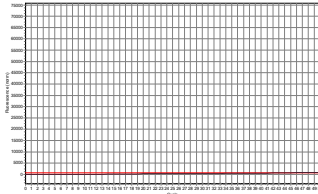

Threshold: 657 (Normal)  
Baseline settings: automatic, DRR correction OFF

142

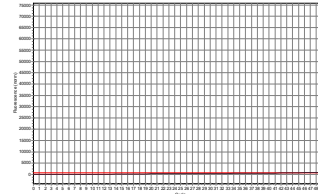

Threshold: 657 (Normal)  
Baseline settings: automatic, DRR correction OFF

143

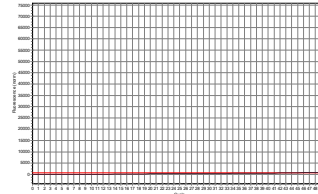

Threshold: 657 (Normal)  
Baseline settings: automatic, DRR correction OFF

144

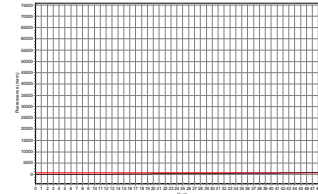

Threshold: 657 (Normal)  
Baseline settings: automatic, DRR correction OFF

145

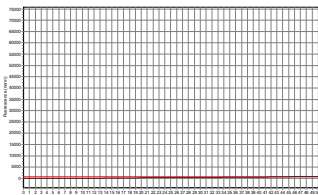

Threshold: 657 (Normal)  
Baseline settings: automatic, DRR correction OFF

146

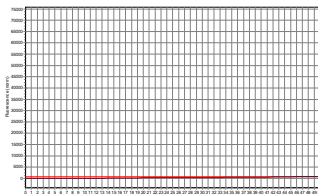

Threshold: 657 (Normal)  
Baseline settings: automatic, DRR correction OFF

147

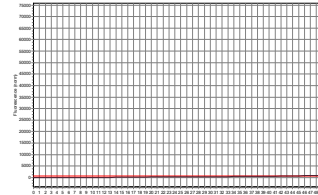

Threshold: 657 (Normal)  
Baseline settings: automatic, DRR correction OFF

148

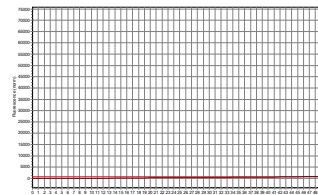

Threshold: 657 (Normal)  
Baseline settings: automatic, DRR correction OFF

149

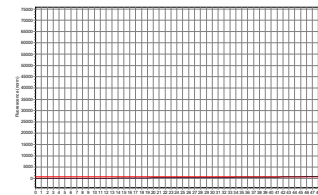

Threshold: 657 (Normal)  
Baseline settings: automatic, DRR correction OFF

150

# Supplemental figure 9

## Pten-NOLC1 fusion detection Pten-NOLC1-PROSTATE-BLOOD SAMPLE 1-20

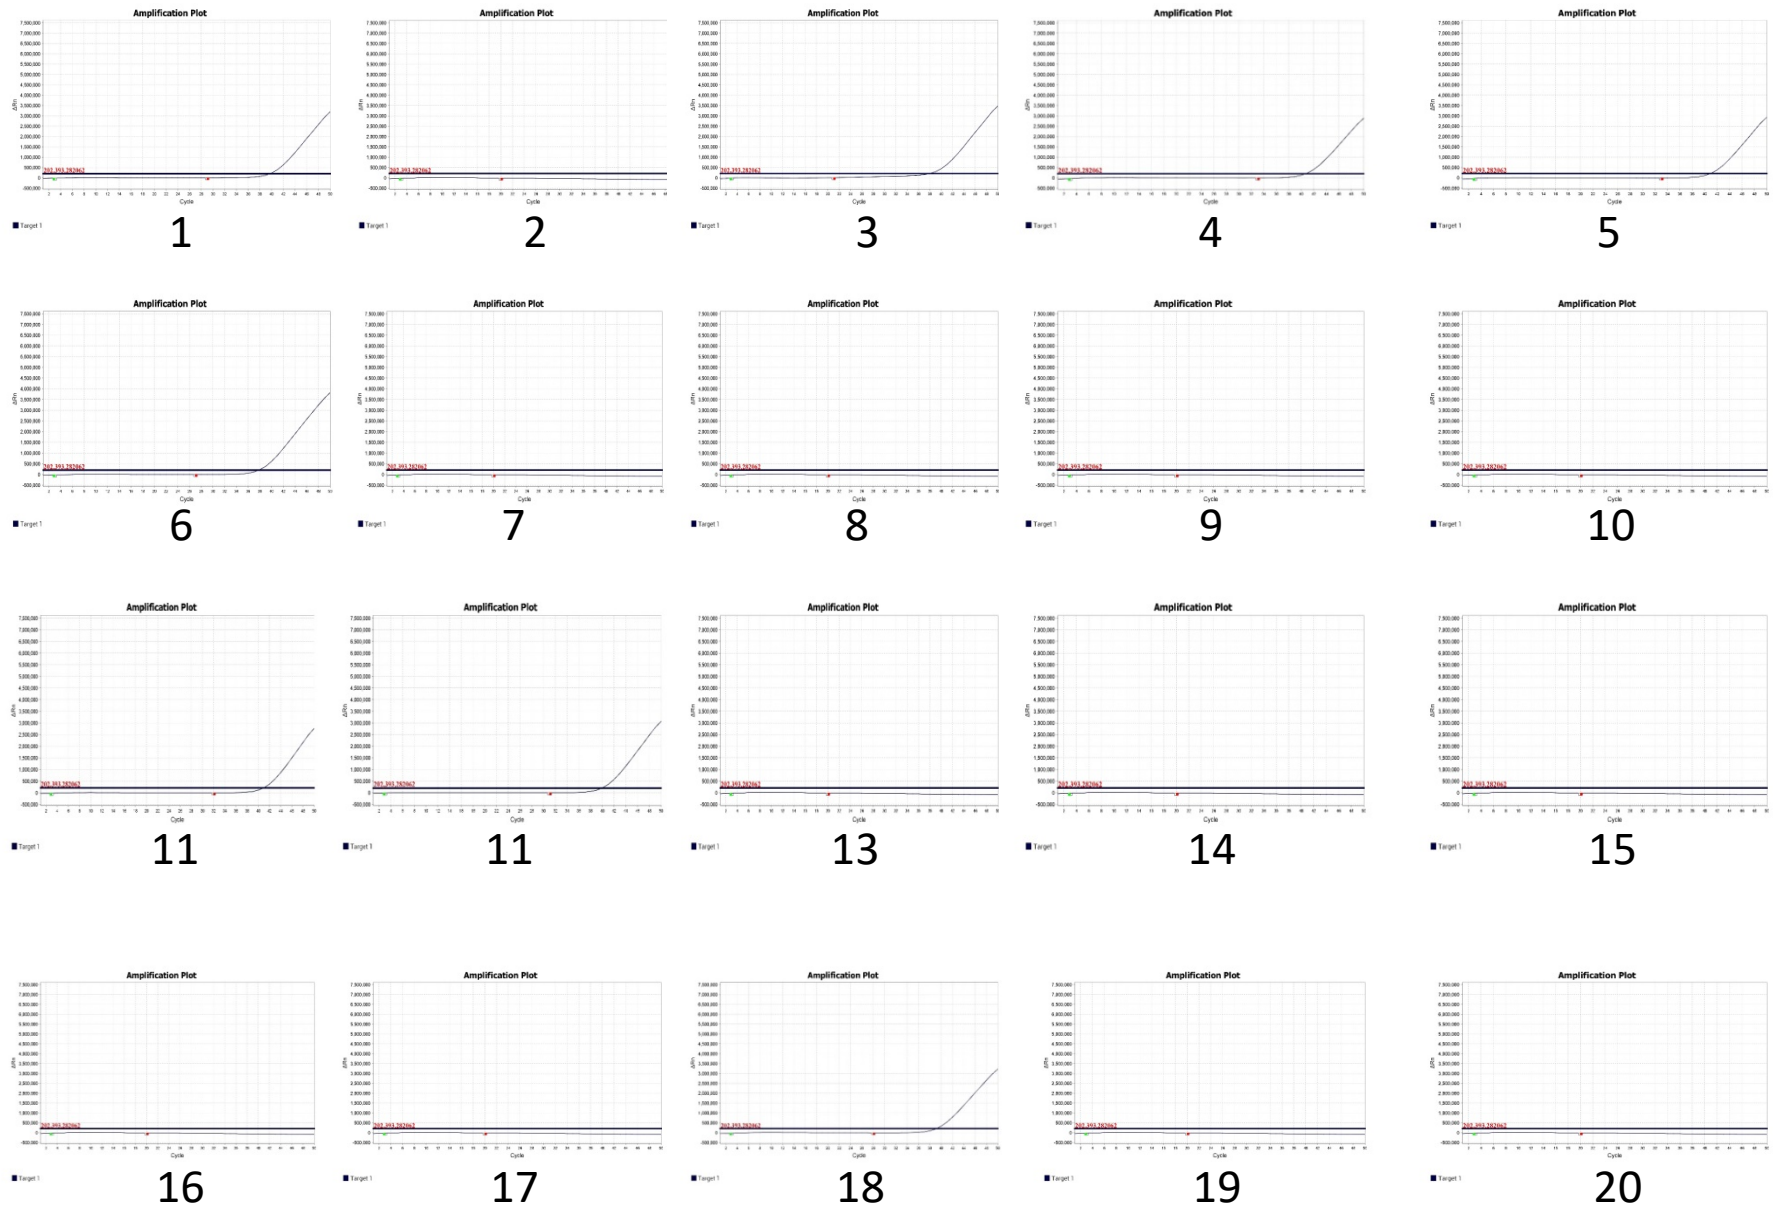

# Pten-NOLC1-PROSTATE-BLOOD SAMPLE 21-40

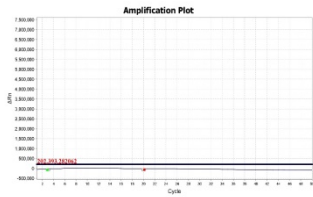

Target 1  
21

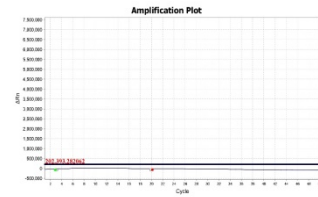

Target 1  
22

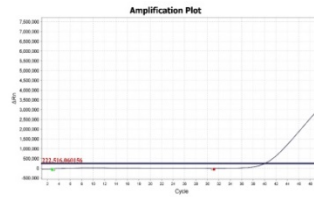

Target 1  
23

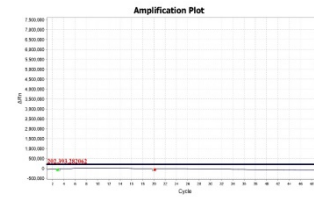

Target 1  
24

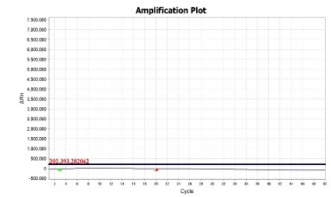

Target 1  
25

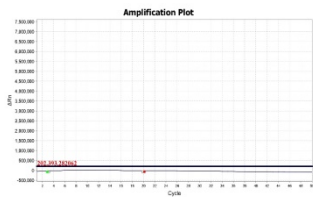

Target 1  
26

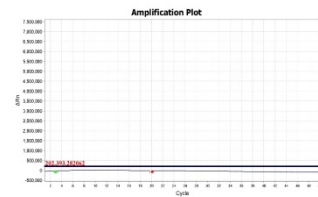

Target 1  
27

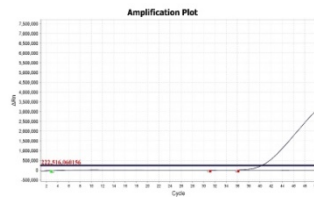

Target 1  
28

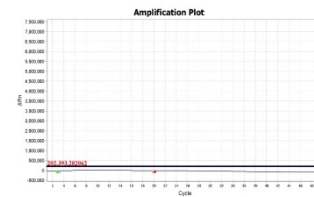

Target 1  
29

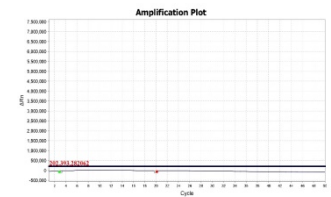

Target 1  
30

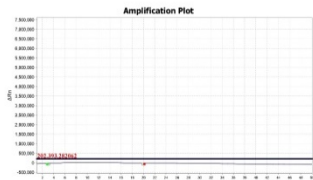

Target 1  
31

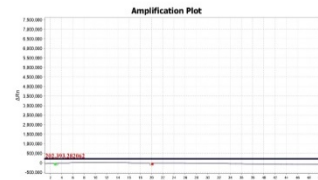

Target 1  
32

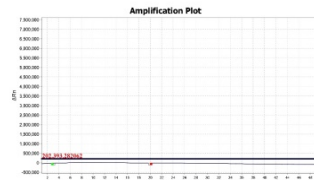

Target 1  
33

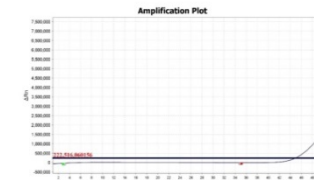

Target 1  
34

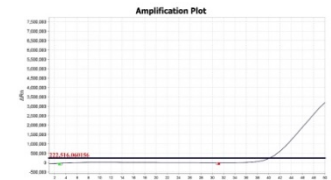

Target 1  
35

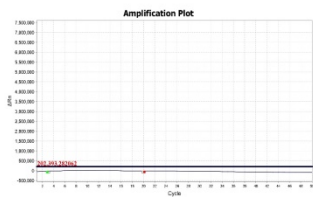

Target 1  
36

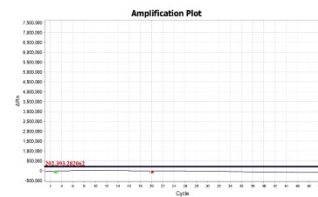

Target 1  
37

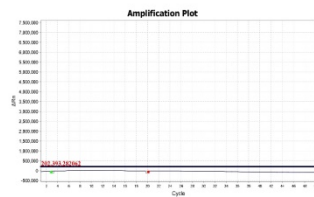

Target 1  
38

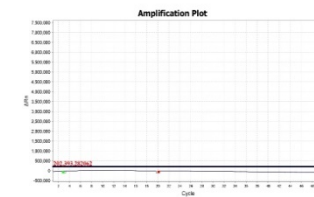

Target 1  
39

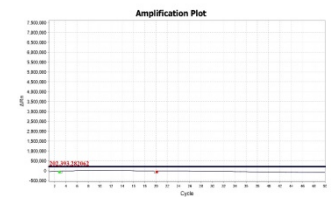

Target 1  
40















# Pten-NOLC1-PROSTATE-BLOOD SAMPLE 141-150

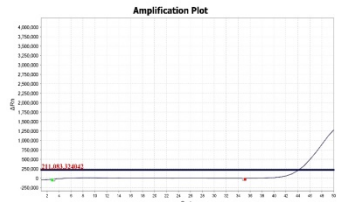

141

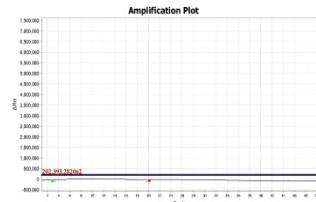

142

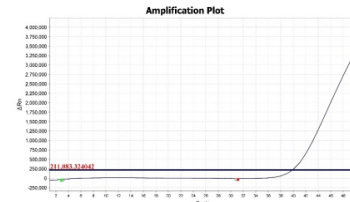

143

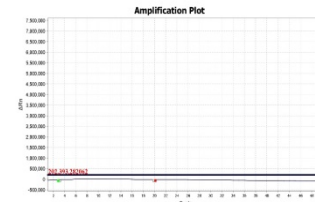

144

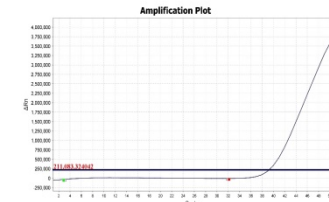

145

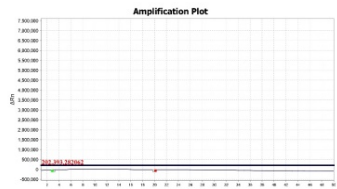

146

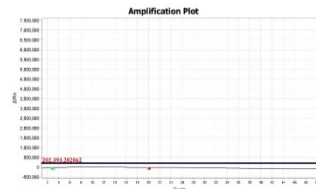

147

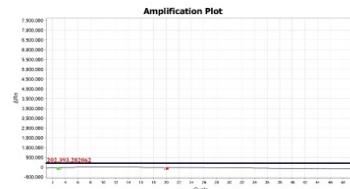

148

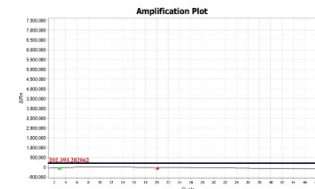

149

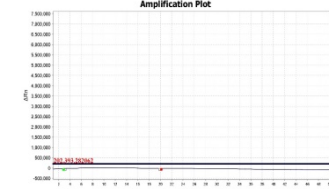

150

# Supplemental figure 10

## $\beta$ -ACTIN-PROSTATE-BLOOD SAMPLE 1-20

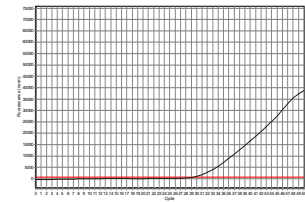

Threshold: 607 (Position: 1)  
Baseline settings: automatic, DR correction: OFF

1

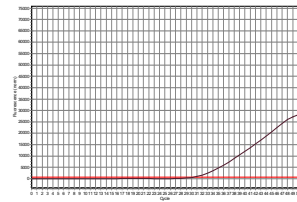

Threshold: 607 (Position: 1)  
Baseline settings: automatic, DR correction: OFF

2

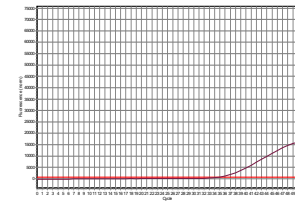

Threshold: 607 (Position: 1)  
Baseline settings: automatic, DR correction: OFF

3

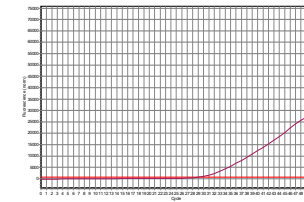

Threshold: 607 (Position: 1)  
Baseline settings: automatic, DR correction: OFF

4

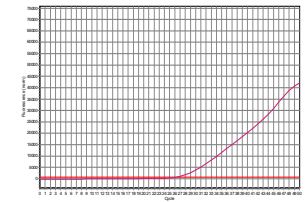

Threshold: 607 (Position: 1)  
Baseline settings: automatic, DR correction: OFF

5

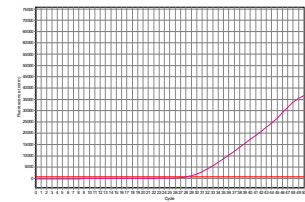

Threshold: 607 (Position: 1)  
Baseline settings: automatic, DR correction: OFF

6

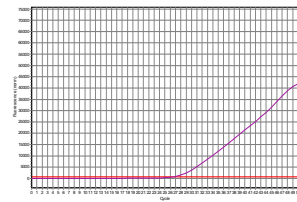

Threshold: 607 (Position: 1)  
Baseline settings: automatic, DR correction: OFF

7

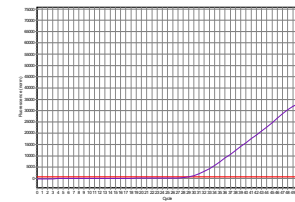

Threshold: 607 (Position: 1)  
Baseline settings: automatic, DR correction: OFF

8

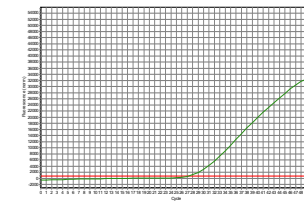

Threshold: 702 (Position: 1)  
Baseline settings: automatic, DR correction: OFF

9

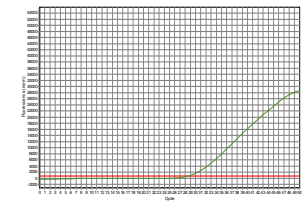

Threshold: 702 (Position: 1)  
Baseline settings: automatic, DR correction: OFF

10

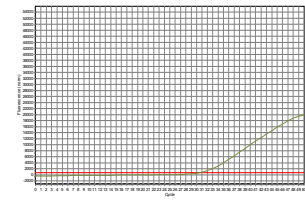

Threshold: 702 (Position: 1)  
Baseline settings: automatic, DR correction: OFF

11

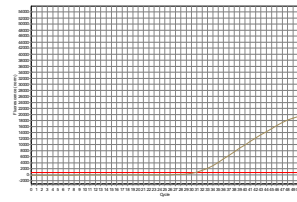

Threshold: 702 (Position: 1)  
Baseline settings: automatic, DR correction: OFF

11

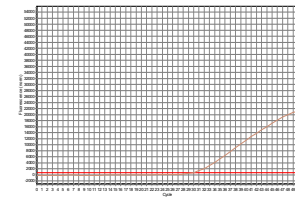

Threshold: 702 (Position: 1)  
Baseline settings: automatic, DR correction: OFF

13

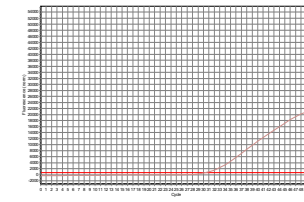

Threshold: 702 (Position: 1)  
Baseline settings: automatic, DR correction: OFF

14

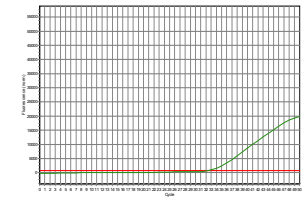

Threshold: 508 (Position: 1)  
Baseline settings: automatic, DR correction: OFF

15

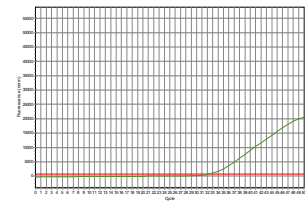

Threshold: 508 (Position: 1)  
Baseline settings: automatic, DR correction: OFF

16

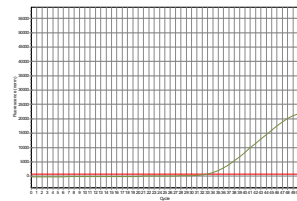

Threshold: 508 (Position: 1)  
Baseline settings: automatic, DR correction: OFF

17

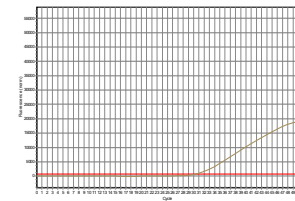

Threshold: 508 (Position: 1)  
Baseline settings: automatic, DR correction: OFF

18

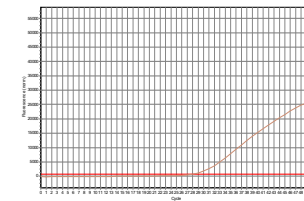

Threshold: 508 (Position: 1)  
Baseline settings: automatic, DR correction: OFF

19

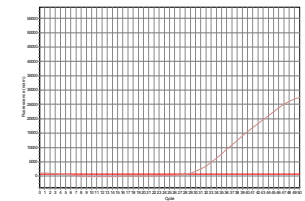

Threshold: 508 (Position: 1)  
Baseline settings: automatic, DR correction: OFF

20

# β-ACTIN-PROSTATE-BLOOD SAMPLE 21-40

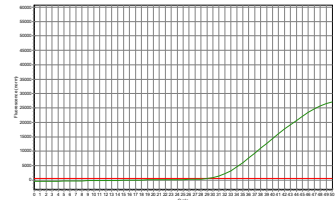

Threshold: 507 (Non-linear)  
Baseline settings: automatic, QPC correction OFF

**21**

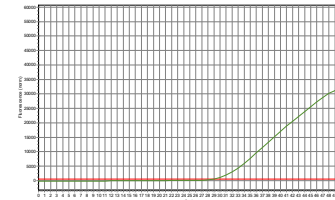

Threshold: 507 (Non-linear)  
Baseline settings: automatic, QPC correction OFF

**22**

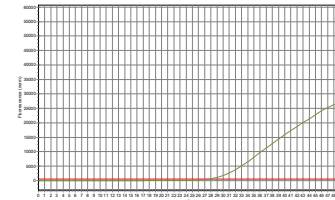

Threshold: 507 (Non-linear)  
Baseline settings: automatic, QPC correction OFF

**23**

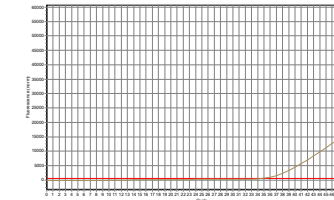

Threshold: 507 (Non-linear)  
Baseline settings: automatic, QPC correction OFF

**24**

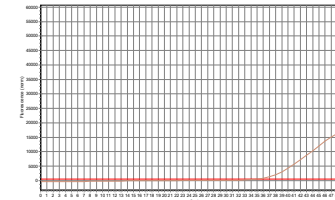

Threshold: 507 (Non-linear)  
Baseline settings: automatic, QPC correction OFF

**25**

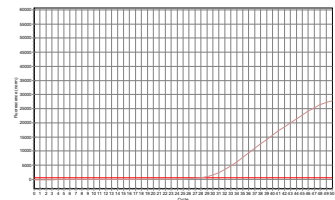

Threshold: 507 (Non-linear)  
Baseline settings: automatic, QPC correction OFF

**26**

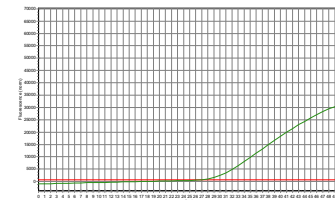

Threshold: 415 (Non-linear)  
Baseline settings: automatic, QPC correction OFF

**27**

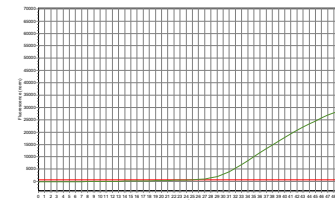

Threshold: 415 (Non-linear)  
Baseline settings: automatic, QPC correction OFF

**28**

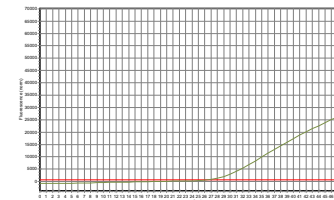

Threshold: 415 (Non-linear)  
Baseline settings: automatic, QPC correction OFF

**29**

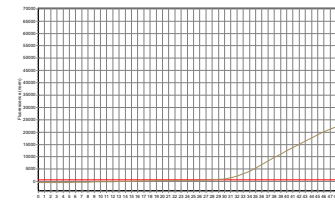

Threshold: 415 (Non-linear)  
Baseline settings: automatic, QPC correction OFF

**30**

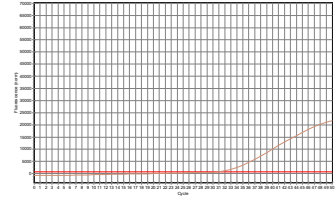

Threshold: 415 (Non-linear)  
Baseline settings: automatic, QPC correction OFF

**31**

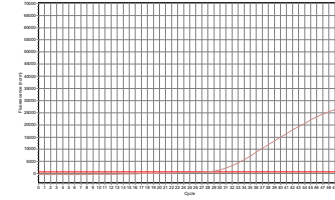

Threshold: 415 (Non-linear)  
Baseline settings: automatic, QPC correction OFF

**32**

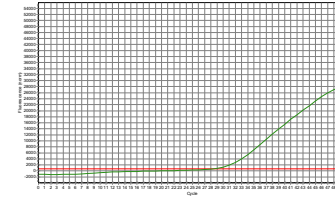

Threshold: 706 (Non-linear)  
Baseline settings: automatic, QPC correction OFF

**33**

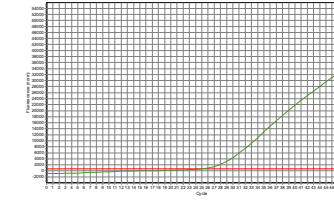

Threshold: 706 (Non-linear)  
Baseline settings: automatic, QPC correction OFF

**34**

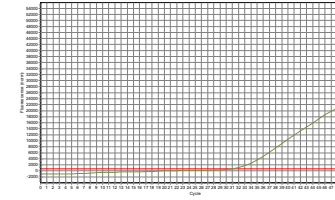

Threshold: 706 (Non-linear)  
Baseline settings: automatic, QPC correction OFF

**35**

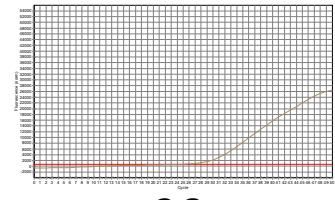

Threshold: 706 (Non-linear)  
Baseline settings: automatic, QPC correction OFF

**36**

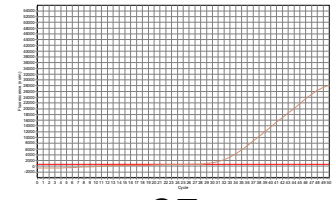

Threshold: 706 (Non-linear)  
Baseline settings: automatic, QPC correction OFF

**37**

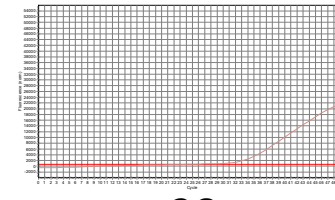

Threshold: 706 (Non-linear)  
Baseline settings: automatic, QPC correction OFF

**38**

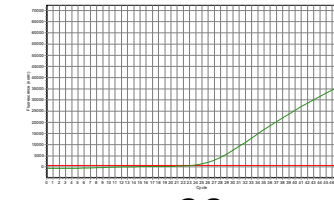

Threshold: 701 (Non-linear)  
Baseline settings: automatic, QPC correction OFF

**39**

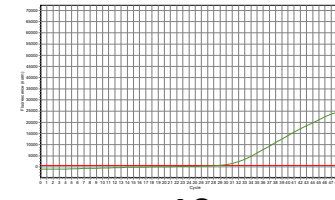

Threshold: 701 (Non-linear)  
Baseline settings: automatic, QPC correction OFF

**40**

# β-ACTIN-PROSTATE-BLOOD SAMPLE 41-60

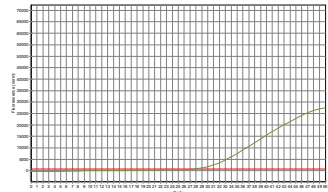

Threshold: 791 (Noiseland)  
Baseline settings: automatic, DR correction OFF

41

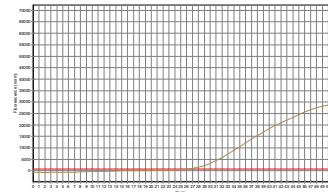

Threshold: 791 (Noiseland)  
Baseline settings: automatic, DR correction OFF

42

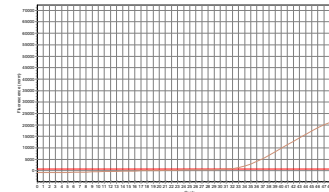

Threshold: 791 (Noiseland)  
Baseline settings: automatic, DR correction OFF

43

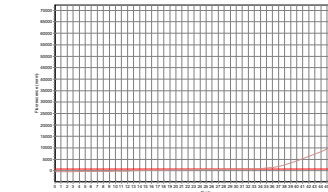

Threshold: 791 (Noiseland)  
Baseline settings: automatic, DR correction OFF

44

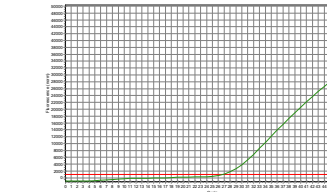

Threshold: 1016 (Noiseland)  
Baseline settings: automatic, DR correction OFF

45

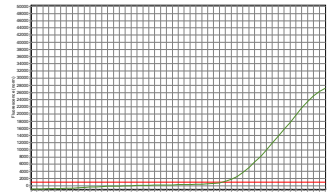

Threshold: 1016 (Noiseland)  
Baseline settings: automatic, DR correction OFF

46

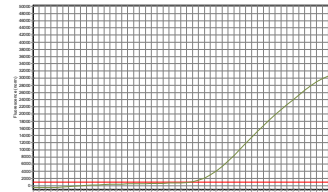

Threshold: 1016 (Noiseland)  
Baseline settings: automatic, DR correction OFF

47

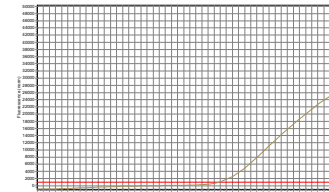

Threshold: 1016 (Noiseland)  
Baseline settings: automatic, DR correction OFF

47

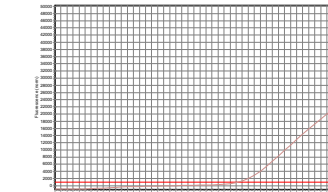

Threshold: 1016 (Noiseland)  
Baseline settings: automatic, DR correction OFF

49

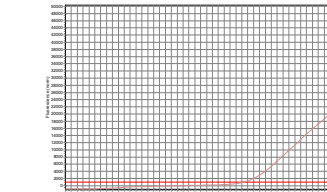

Threshold: 1016 (Noiseland)  
Baseline settings: automatic, DR correction OFF

50

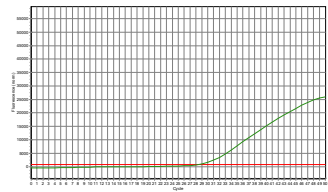

Threshold: 791 (Noiseland)  
Baseline settings: automatic, DR correction OFF

51

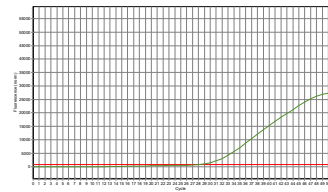

Threshold: 791 (Noiseland)  
Baseline settings: automatic, DR correction OFF

52

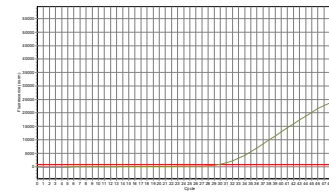

Threshold: 791 (Noiseland)  
Baseline settings: automatic, DR correction OFF

53

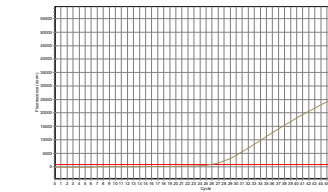

Threshold: 791 (Noiseland)  
Baseline settings: automatic, DR correction OFF

54

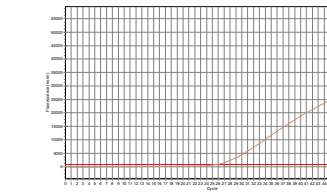

Threshold: 791 (Noiseland)  
Baseline settings: automatic, DR correction OFF

55

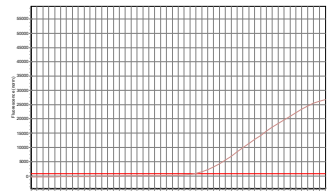

Threshold: 791 (Noiseland)  
Baseline settings: automatic, DR correction OFF

56

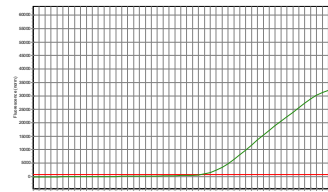

Threshold: 791 (Noiseland)  
Baseline settings: automatic, DR correction OFF

57

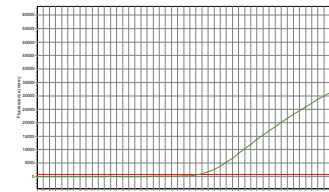

Threshold: 791 (Noiseland)  
Baseline settings: automatic, DR correction OFF

58

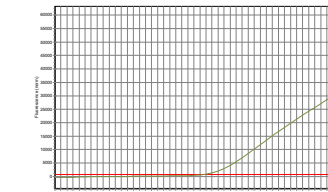

Threshold: 791 (Noiseland)  
Baseline settings: automatic, DR correction OFF

59

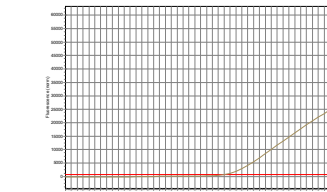

Threshold: 791 (Noiseland)  
Baseline settings: automatic, DR correction OFF

60

# $\beta$ -ACTIN-PROSTATE-BLOOD SAMPLE 61-80

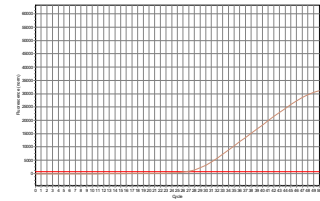

Threshold: 750 (Normalized)  
Baseline settings: automatic, DR correction OFF

61

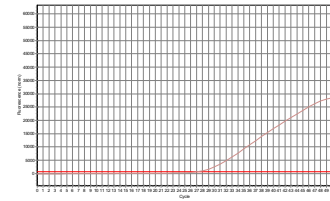

Threshold: 750 (Normalized)  
Baseline settings: automatic, DR correction OFF

62

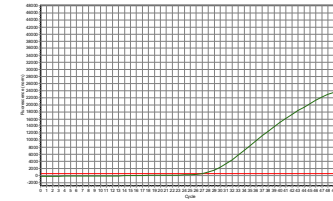

Threshold: 550 (Normalized)  
Baseline settings: automatic, DR correction OFF

63

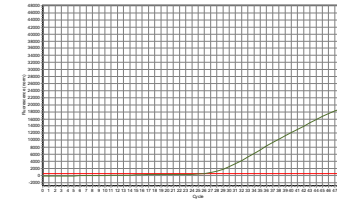

Threshold: 550 (Normalized)  
Baseline settings: automatic, DR correction OFF

64

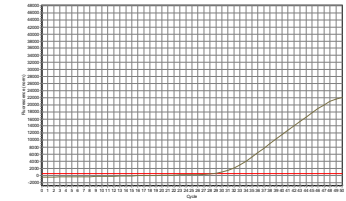

Threshold: 550 (Normalized)  
Baseline settings: automatic, DR correction OFF

65

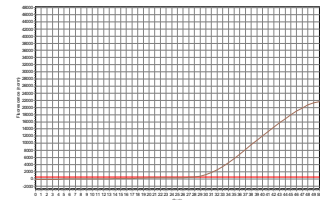

Threshold: 550 (Normalized)  
Baseline settings: automatic, DR correction OFF

66

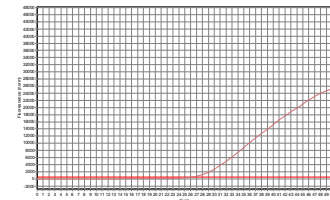

Threshold: 550 (Normalized)  
Baseline settings: automatic, DR correction OFF

67

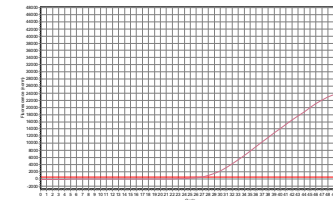

Threshold: 550 (Normalized)  
Baseline settings: automatic, DR correction OFF

68

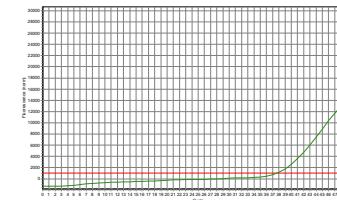

Threshold: 100 (Normalized)  
Baseline settings: automatic, DR correction OFF

69

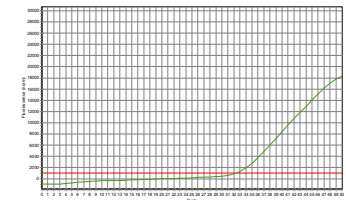

Threshold: 100 (Normalized)  
Baseline settings: automatic, DR correction OFF

70

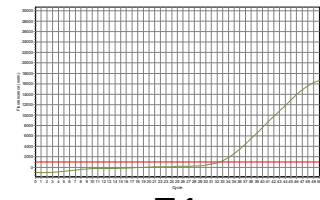

Threshold: 100 (Normalized)  
Baseline settings: automatic, DR correction OFF

71

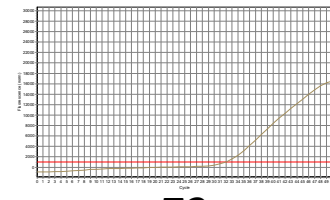

Threshold: 100 (Normalized)  
Baseline settings: automatic, DR correction OFF

72

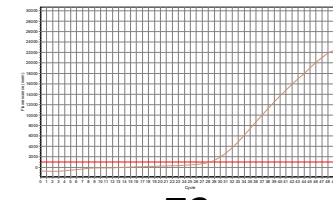

Threshold: 100 (Normalized)  
Baseline settings: automatic, DR correction OFF

73

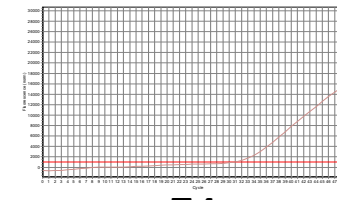

Threshold: 100 (Normalized)  
Baseline settings: automatic, DR correction OFF

74

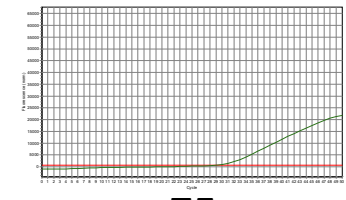

Threshold: 80 (Normalized)  
Baseline settings: automatic, DR correction OFF

75

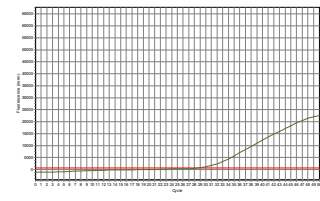

Threshold: 80 (Normalized)  
Baseline settings: automatic, DR correction OFF

76

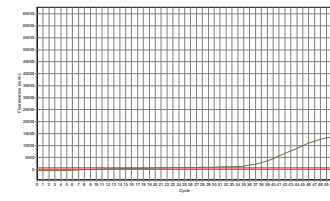

Threshold: 80 (Normalized)  
Baseline settings: automatic, DR correction OFF

77

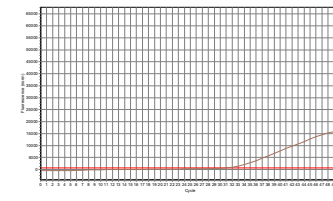

Threshold: 80 (Normalized)  
Baseline settings: automatic, DR correction OFF

78

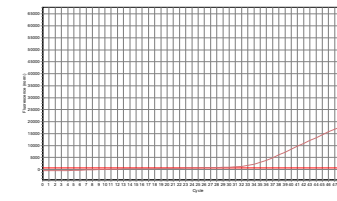

Threshold: 80 (Normalized)  
Baseline settings: automatic, DR correction OFF

79

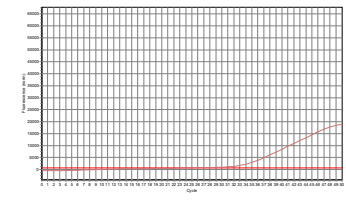

Threshold: 80 (Normalized)  
Baseline settings: automatic, DR correction OFF

80



# β-ACTIN-PROSTATE-BLOOD SAMPLE 81-100

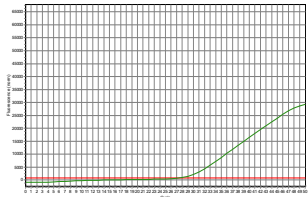

Threshold: 850 (Normalized)  
Baseline settings: automatic, QPCR correction OFF

81

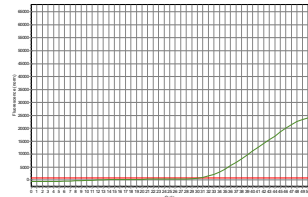

Threshold: 850 (Normalized)  
Baseline settings: automatic, QPCR correction OFF

82

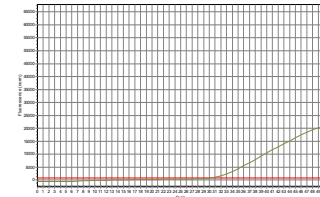

Threshold: 850 (Normalized)  
Baseline settings: automatic, QPCR correction OFF

83

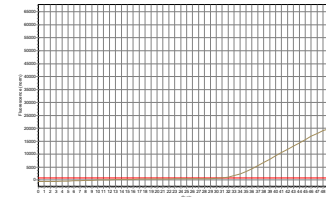

Threshold: 850 (Normalized)  
Baseline settings: automatic, QPCR correction OFF

84

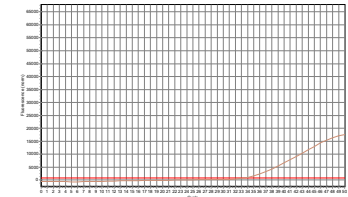

Threshold: 850 (Normalized)  
Baseline settings: automatic, QPCR correction OFF

85

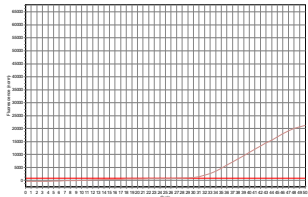

Threshold: 757 (Normalized)  
Baseline settings: automatic, QPCR correction OFF

86

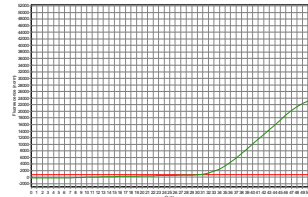

Threshold: 757 (Normalized)  
Baseline settings: automatic, QPCR correction OFF

87

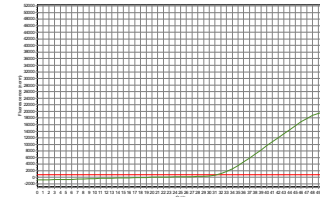

Threshold: 757 (Normalized)  
Baseline settings: automatic, QPCR correction OFF

88

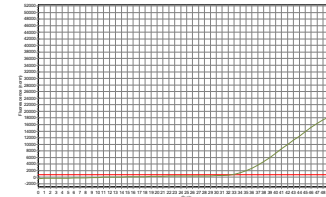

Threshold: 757 (Normalized)  
Baseline settings: automatic, QPCR correction OFF

89

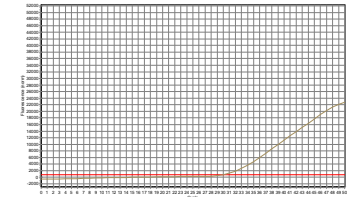

Threshold: 757 (Normalized)  
Baseline settings: automatic, QPCR correction OFF

90

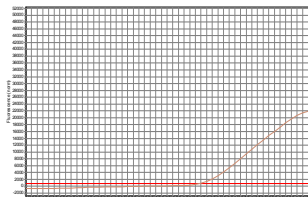

Threshold: 757 (Normalized)  
Baseline settings: automatic, QPCR correction OFF

91

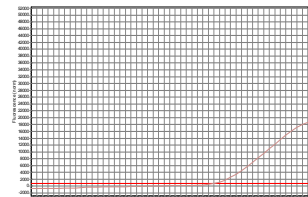

Threshold: 757 (Normalized)  
Baseline settings: automatic, QPCR correction OFF

92

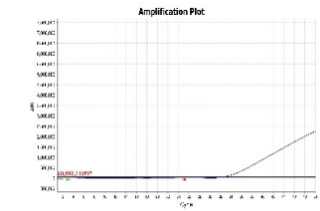

93

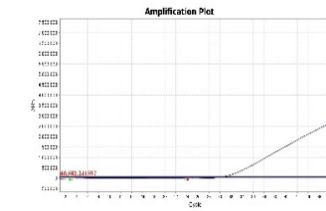

94

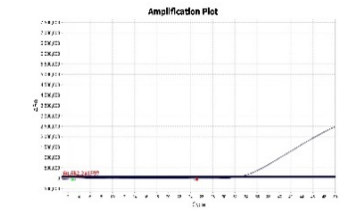

95

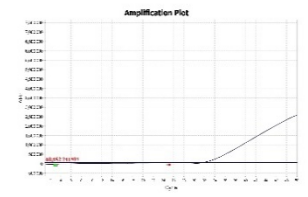

96

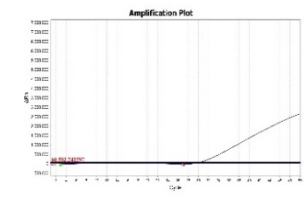

97

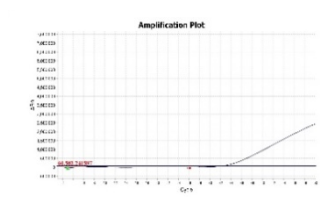

98

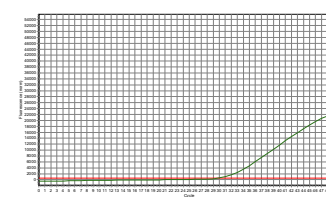

Threshold: 877 (Normalized)  
Baseline settings: automatic, QPCR correction OFF

99

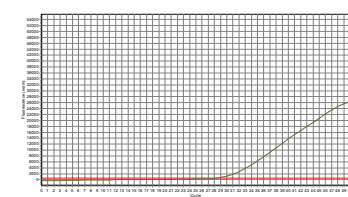

Threshold: 877 (Normalized)  
Baseline settings: automatic, QPCR correction OFF

100

# β-ACTIN-PROSTATE-BLOOD SAMPLE 101-120

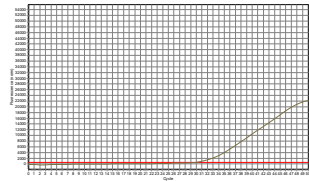

101

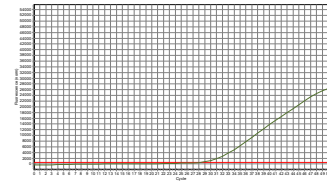

102

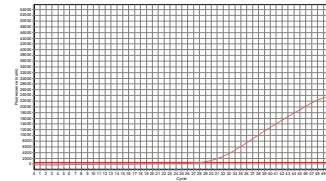

103

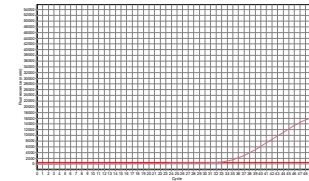

104

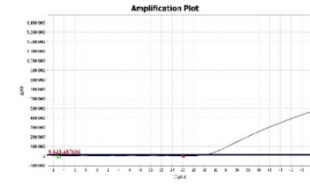

105

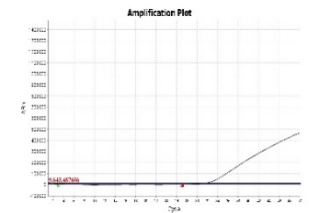

106

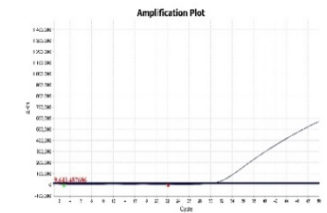

107

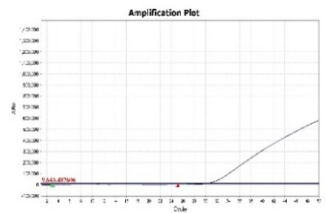

108

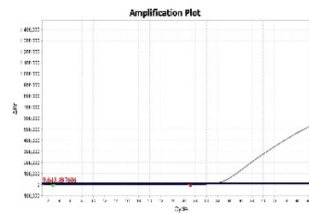

109

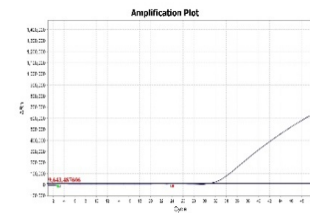

110

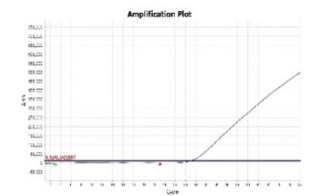

111

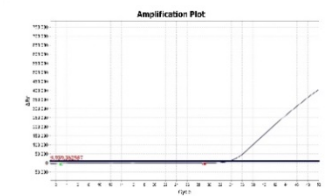

111

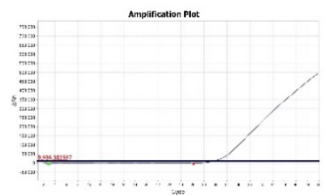

113

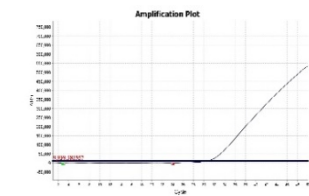

114

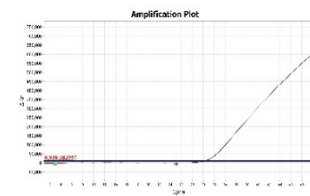

115

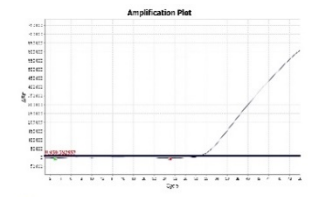

116

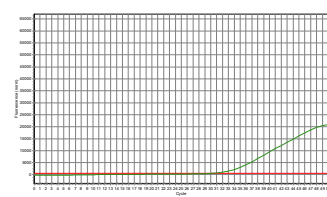

117

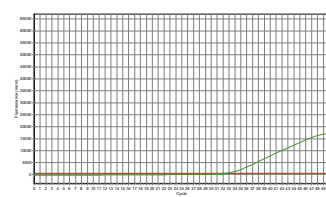

118

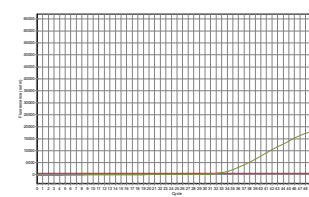

119

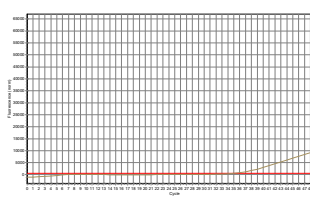

120



# $\beta$ -ACTIN-PROSTATE-BLOOD SAMPLE 121-140

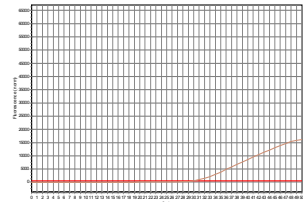

Threshold: 552 (Threshold)  
Baseline settings: automatic, Diff correction OFF

**121**

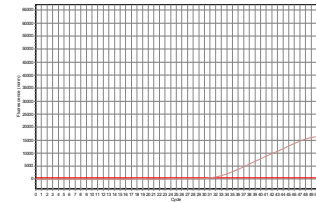

Threshold: 552 (Threshold)  
Baseline settings: automatic, Diff correction OFF

**122**

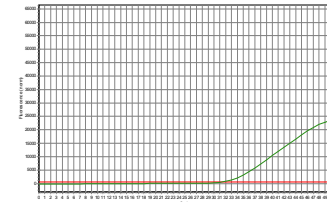

Threshold: 552 (Threshold)  
Baseline settings: automatic, Diff correction OFF

**123**

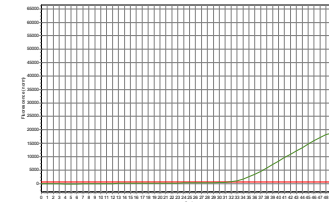

Threshold: 552 (Threshold)  
Baseline settings: automatic, Diff correction OFF

**124**

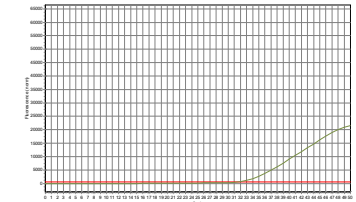

Threshold: 552 (Threshold)  
Baseline settings: automatic, Diff correction OFF

**125**

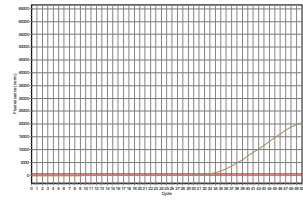

Threshold: 552 (Threshold)  
Baseline settings: automatic, Diff correction OFF

**126**

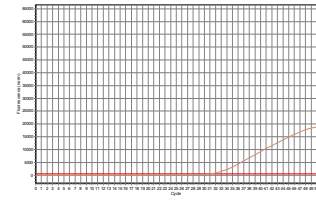

Threshold: 552 (Threshold)  
Baseline settings: automatic, Diff correction OFF

**127**

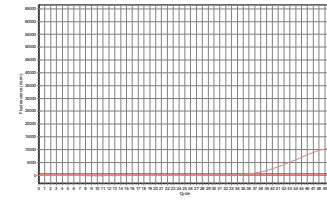

Threshold: 552 (Threshold)  
Baseline settings: automatic, Diff correction OFF

**128**

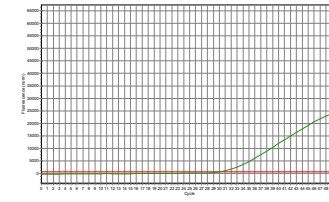

Threshold: 552 (Threshold)  
Baseline settings: automatic, Diff correction OFF

**129**

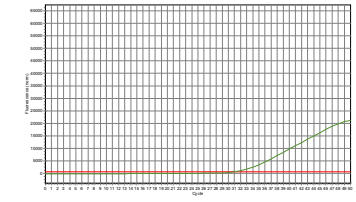

Threshold: 552 (Threshold)  
Baseline settings: automatic, Diff correction OFF

**130**

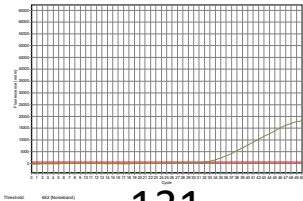

Threshold: 552 (Threshold)  
Baseline settings: automatic, Diff correction OFF

**131**

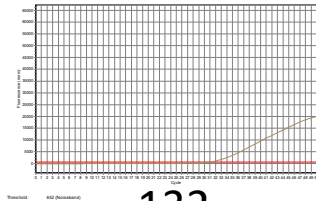

Threshold: 552 (Threshold)  
Baseline settings: automatic, Diff correction OFF

**132**

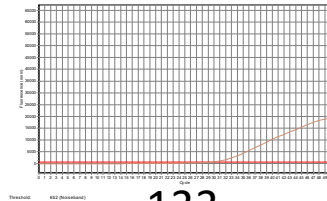

Threshold: 552 (Threshold)  
Baseline settings: automatic, Diff correction OFF

**133**

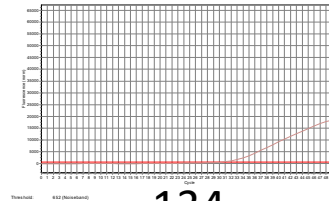

Threshold: 552 (Threshold)  
Baseline settings: automatic, Diff correction OFF

**134**

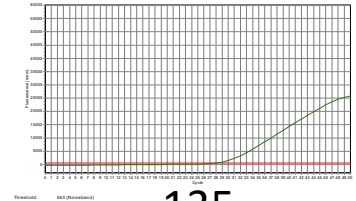

Threshold: 552 (Threshold)  
Baseline settings: automatic, Diff correction OFF

**135**

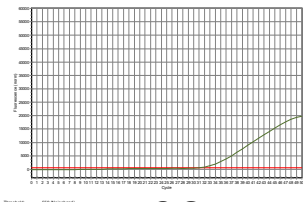

Threshold: 552 (Threshold)  
Baseline settings: automatic, Diff correction OFF

**136**

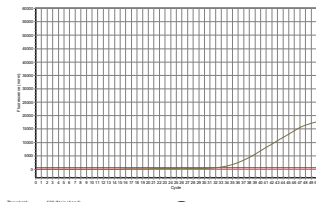

Threshold: 552 (Threshold)  
Baseline settings: automatic, Diff correction OFF

**137**

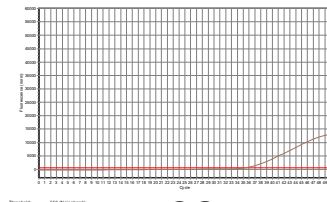

Threshold: 552 (Threshold)  
Baseline settings: automatic, Diff correction OFF

**138**

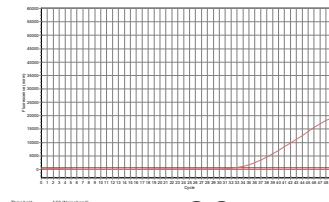

Threshold: 552 (Threshold)  
Baseline settings: automatic, Diff correction OFF

**139**

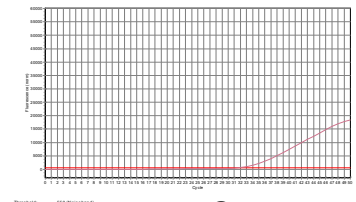

Threshold: 552 (Threshold)  
Baseline settings: automatic, Diff correction OFF

**140**

# $\beta$ -ACTIN-PROSTATE-BLOOD SAMPLE 141-150

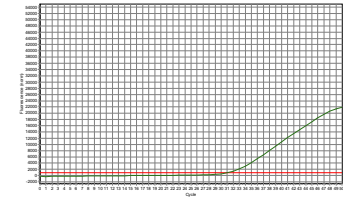

Threshold: 556 (Adjusted manually)  
Baseline settings: automatic, Drift correction: OFF

**141**

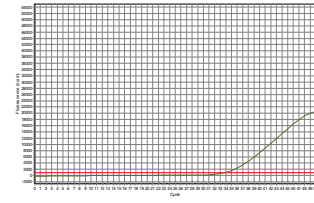

Threshold: 556 (Adjusted manually)  
Baseline settings: automatic, Drift correction: OFF

**142**

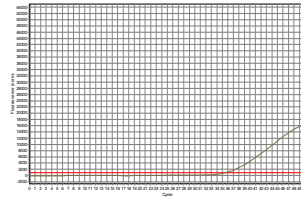

Threshold: 556 (Adjusted manually)  
Baseline settings: automatic, Drift correction: OFF

**143**

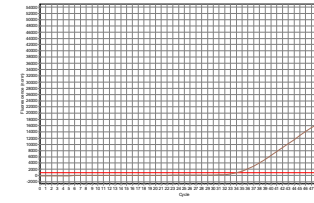

Threshold: 556 (Adjusted manually)  
Baseline settings: automatic, Drift correction: OFF

**144**

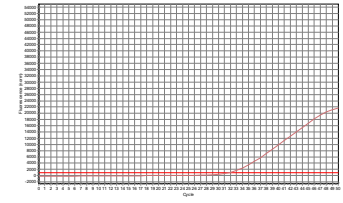

Threshold: 556 (Adjusted manually)  
Baseline settings: automatic, Drift correction: OFF

**145**

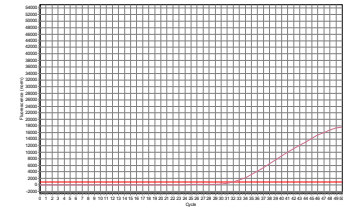

Threshold: 556 (Adjusted manually)  
Baseline settings: automatic, Drift correction: OFF

**146**

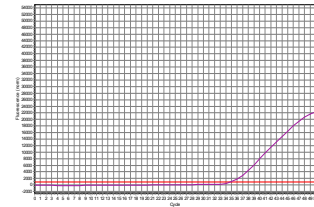

Threshold: 556 (Adjusted manually)  
Baseline settings: automatic, Drift correction: OFF

**147**

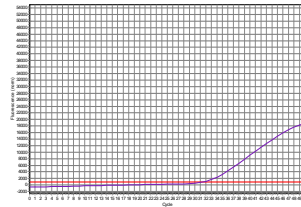

Threshold: 556 (Adjusted manually)  
Baseline settings: automatic, Drift correction: OFF

**148**

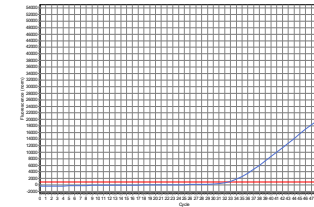

Threshold: 556 (Adjusted manually)  
Baseline settings: automatic, Drift correction: OFF

**149**

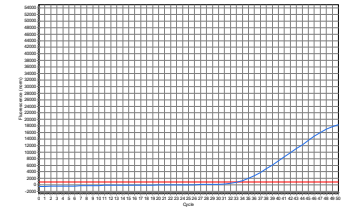

Threshold: 556 (Adjusted manually)  
Baseline settings: automatic, Drift correction: OFF

**150**

## Supplemental figure 11

KDM4B-AC011523.2

Sample #18

Sample #114

KDM4B

AC011523.2

KDM4B

AC011523.2

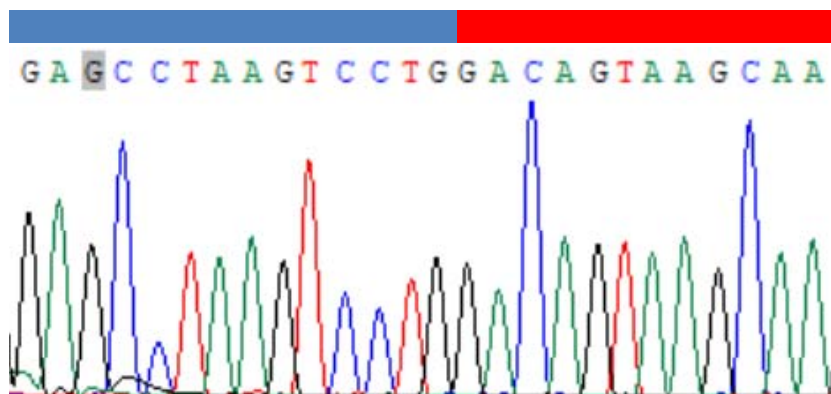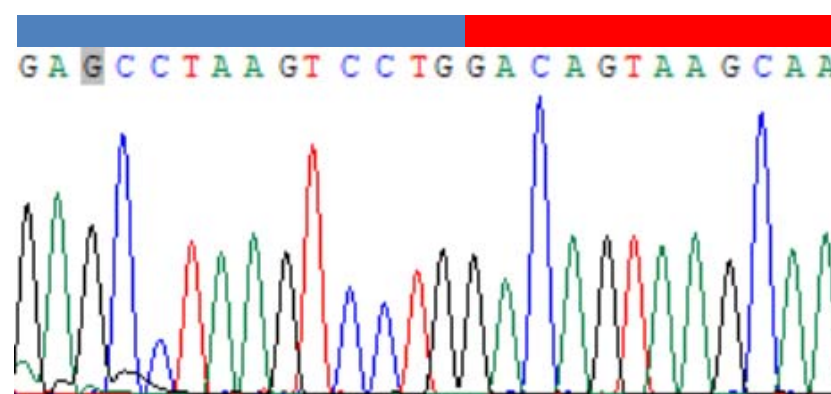

CCNH-c5orf30

Sample #2

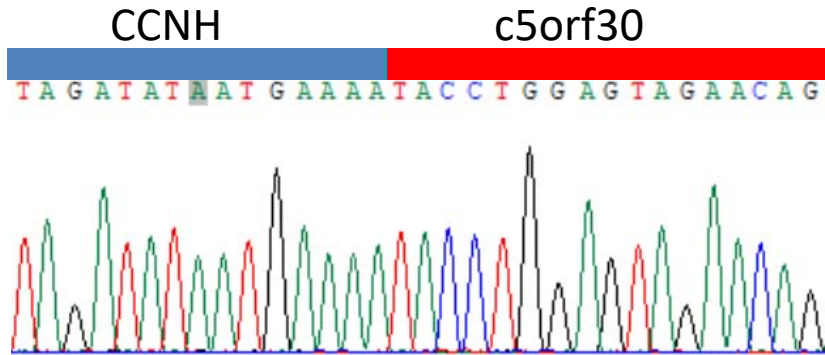

Sample #4

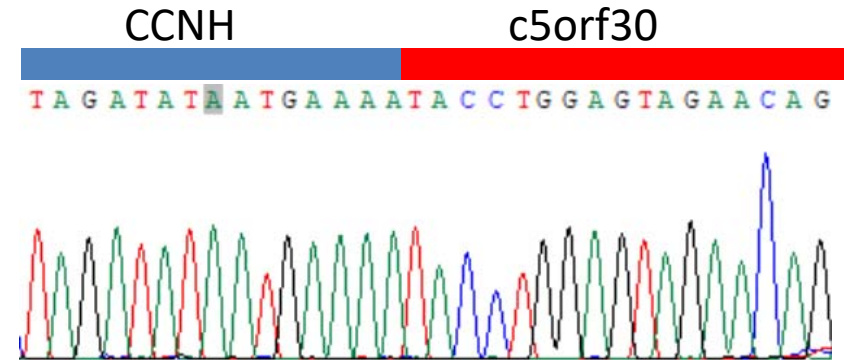

Sample #18

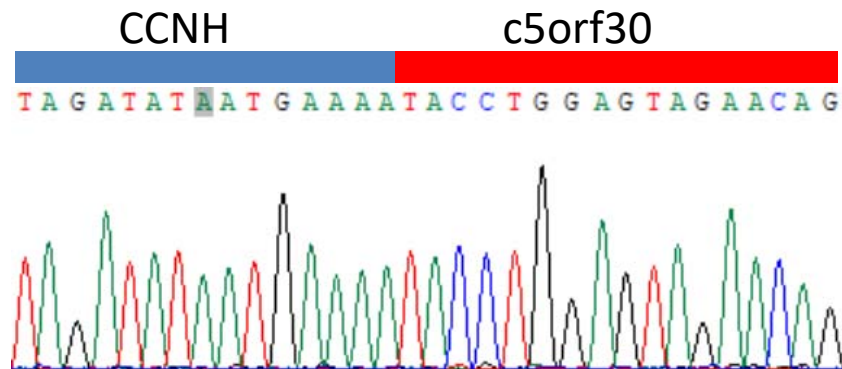

Sample #41

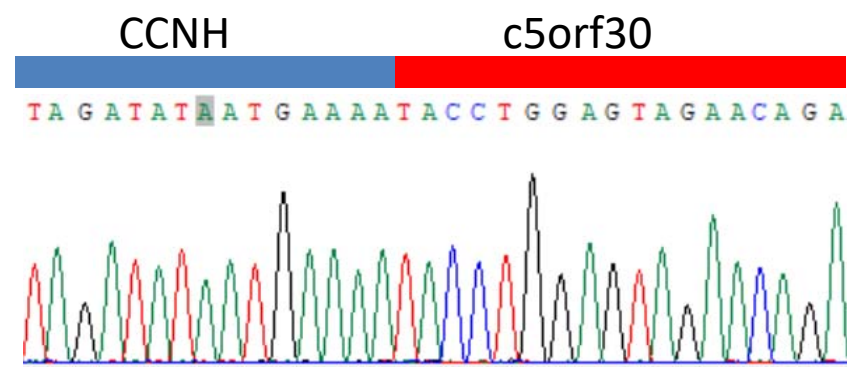

Sample #32

CCNH

c5orf30

TAGATAT AATGAAAATACCTGGAGTAGAACAG

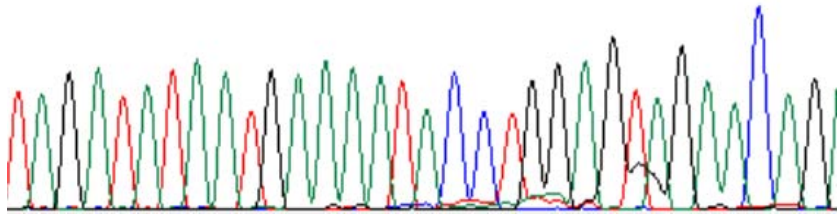

Sample #117

CCNH

c5orf30

TAGATAT AATGAAAATACCTGGAGTAGAACAG

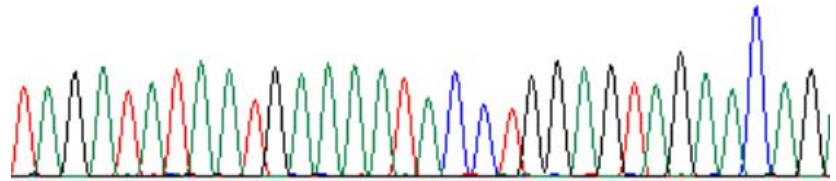

Sample #127

CCNH

c5orf30

TAGATAT AATGAAAATACCTGGAGTAGAACAG

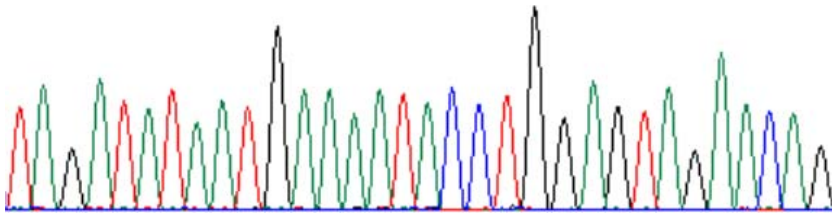

Sample #70

CCNH

c5orf30

TAGATAT AATGAAAATACCTGGAGTAGAACAG

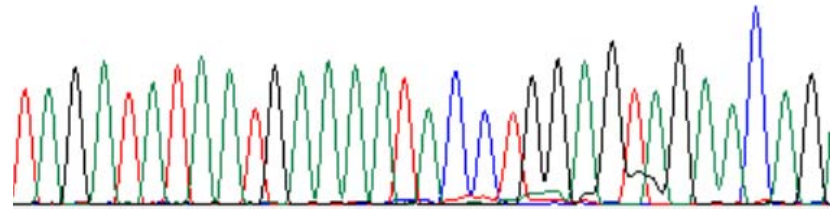

# mTOR-TP53BP1

## Sample #6

mTOR

TP53BP1

TCAAGTCAAGGATTCCCTTGTTCTGGGAATGTCA GTGGAAGGGCGAAT

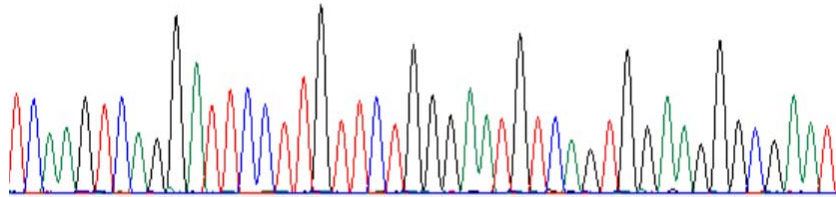

## Sample #18

mTOR

TP53BP1

TCAAGTCAAGGATTCCCTTGTTCTGGGAATGTCA GTGGAAGGGCGAAT

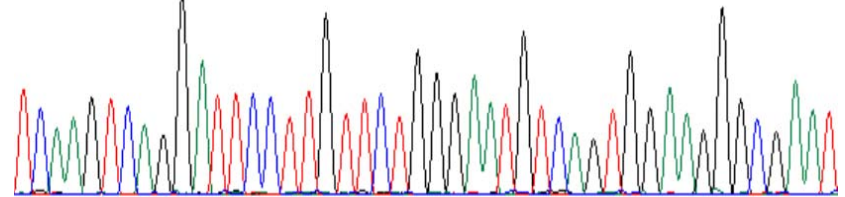

## Sample #59

mTOR

TP53BP1

TCAAGTCAAGGATTCCCTTGTTCTGGGAATGTCA GTGGAAGGGCGAAT

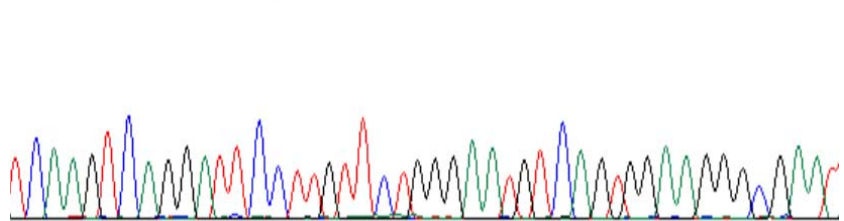

## Sample #49

mTOR

TP53BP1

TCAAGTCAAGGATTCCCTTGTTCTGGGAATGTCA GTGGAAGGGCGAAT

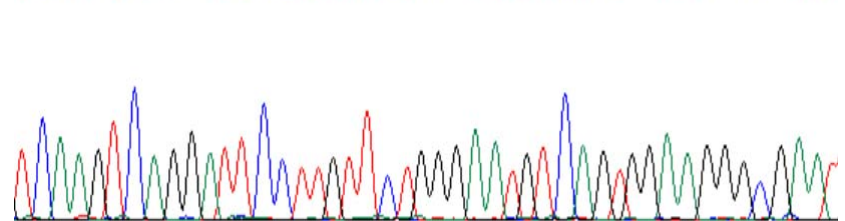

Sample #63

mTOR

TP53BP1

T C A A G T C **A** G G A T T C C T T G T T C T G G G A A T G T C A G T G G A A G G G C G A A T

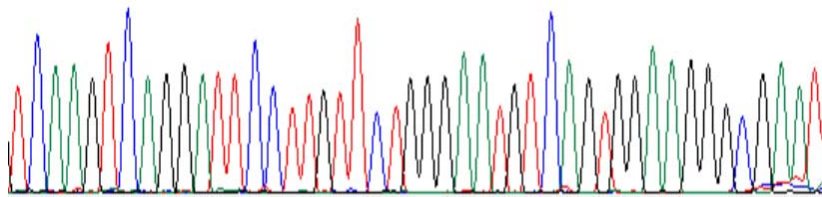

Sample #124

mTOR

TP53BP1

T C A A G T C **A** G G A T T C C T T G T T C T G G G A A T G T C A G T G G A A G G G C G A A T

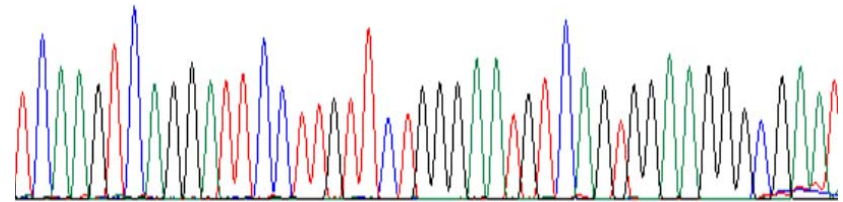



MAN2A1-FER

Sample #20

MAN2A1

FER

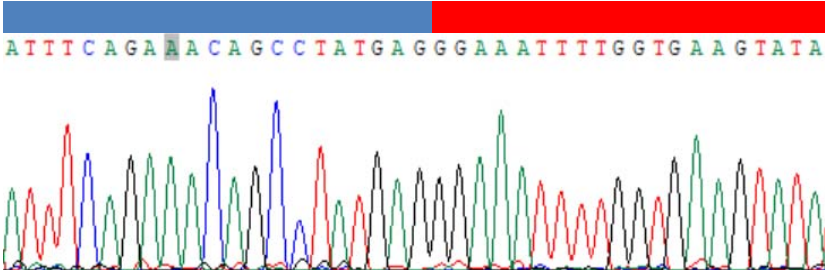

Sample #38

MAN2A1

FER

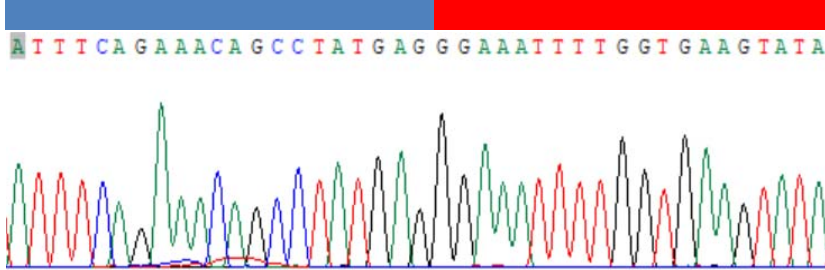

Sample #19

MAN2A1

FER

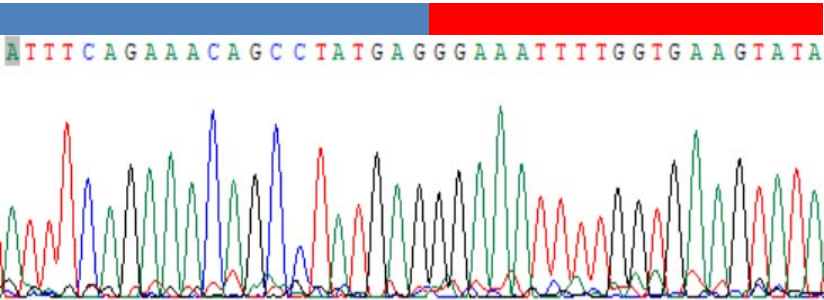

Sample #17

MAN2A1

FER

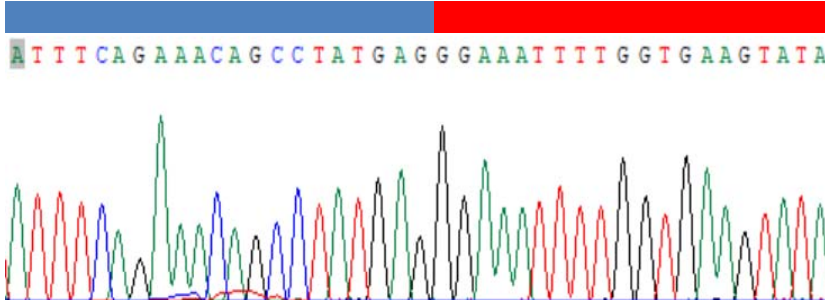

Sample #18

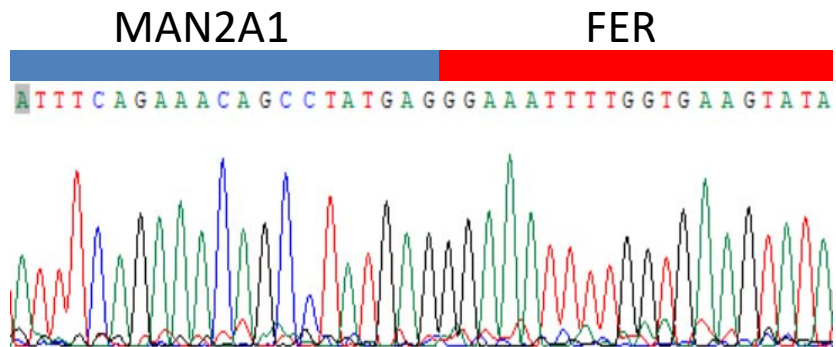

Sample #8

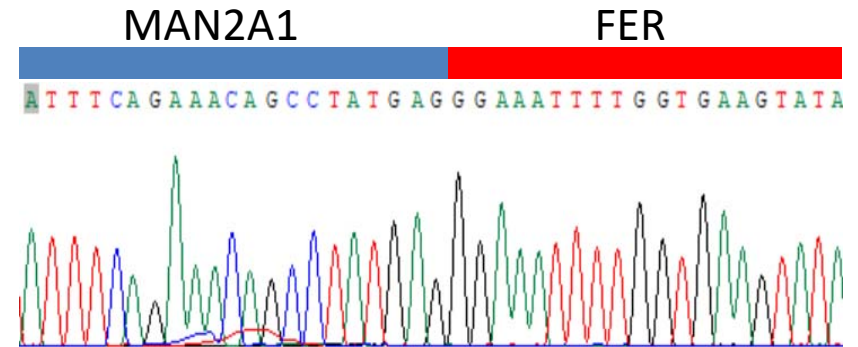

Sample #35

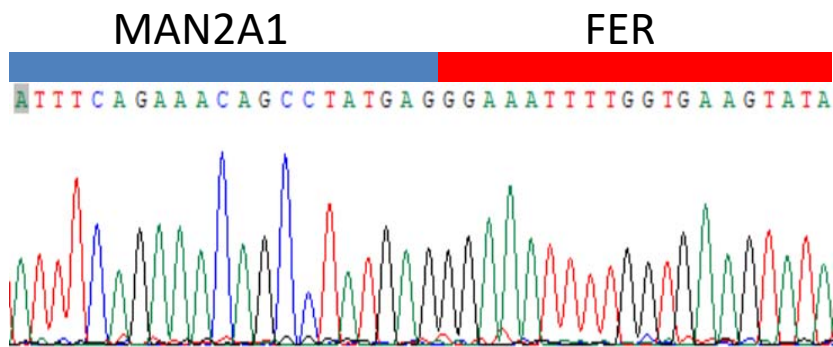

Sample #5

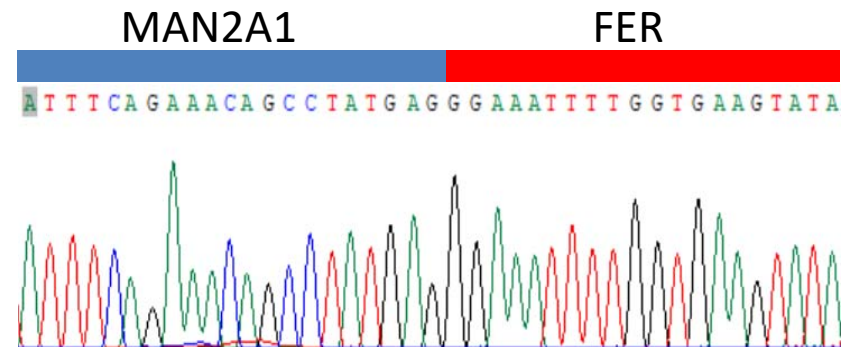

Sample #27

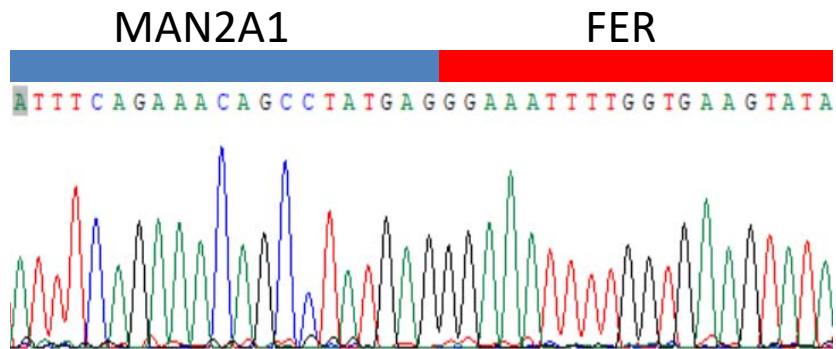

Sample #42

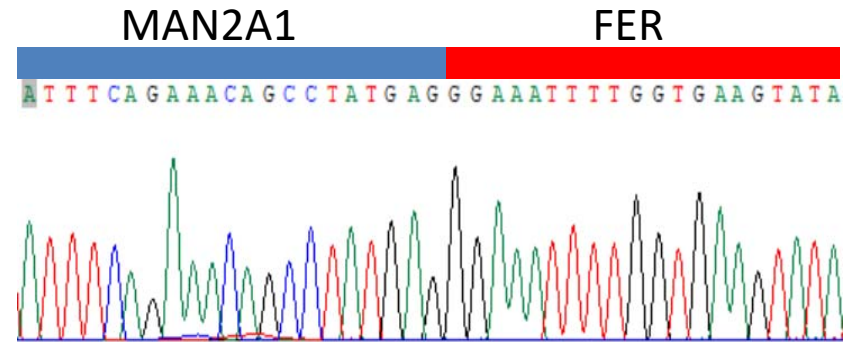

Sample #2

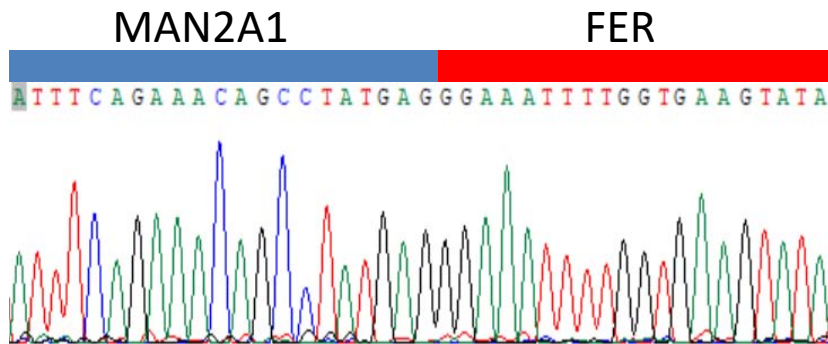

Sample #3

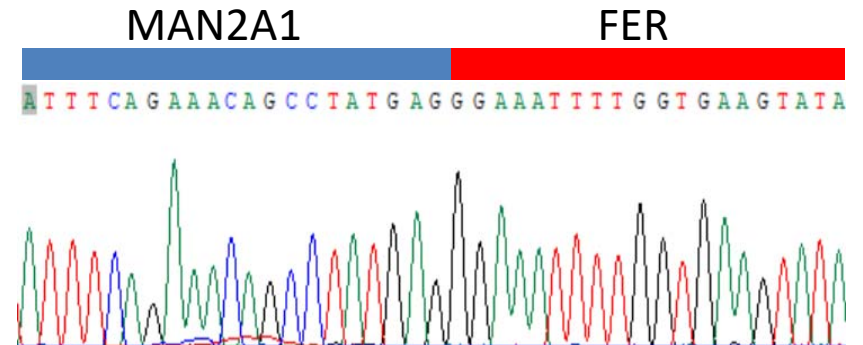

Sample #114

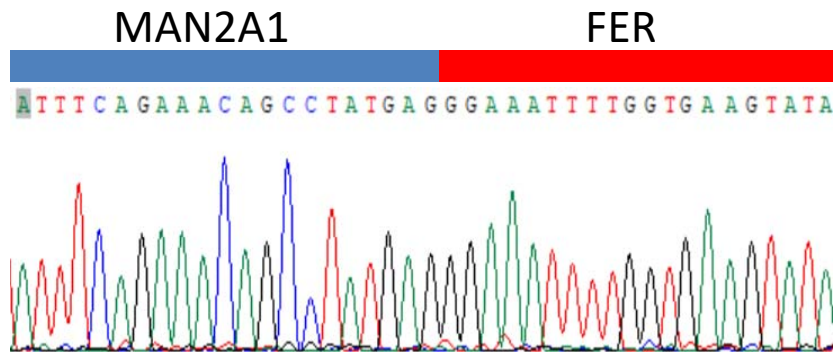

Sample #113

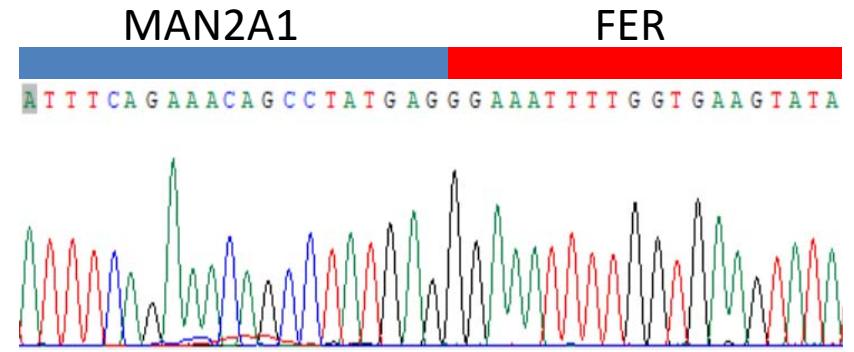

Sample #104

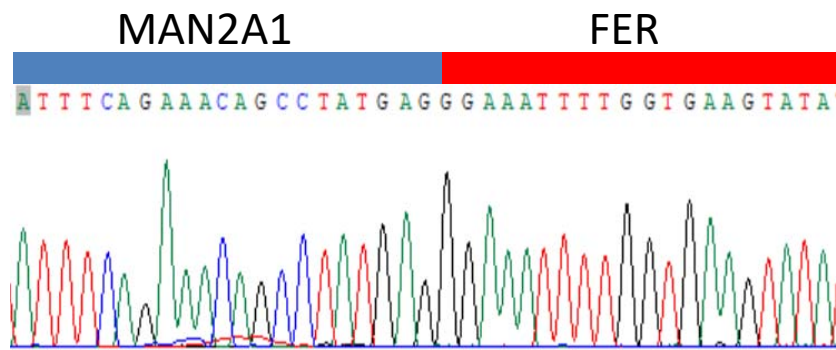

Sample #31

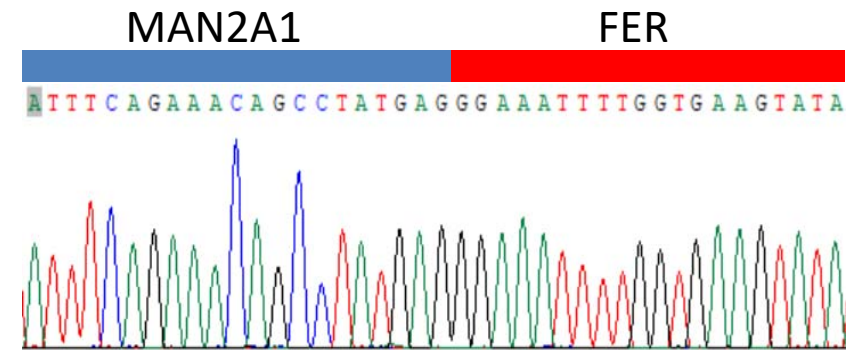

Sample #1

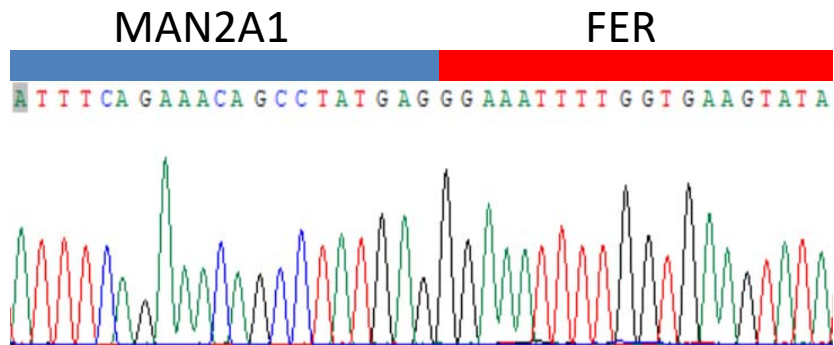

Sample #4

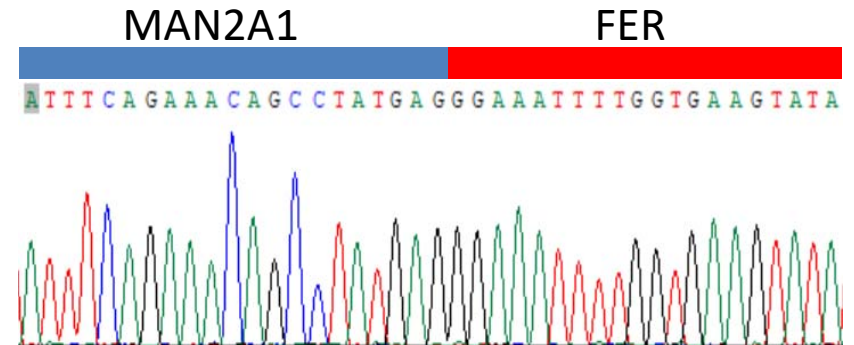

Sample #6

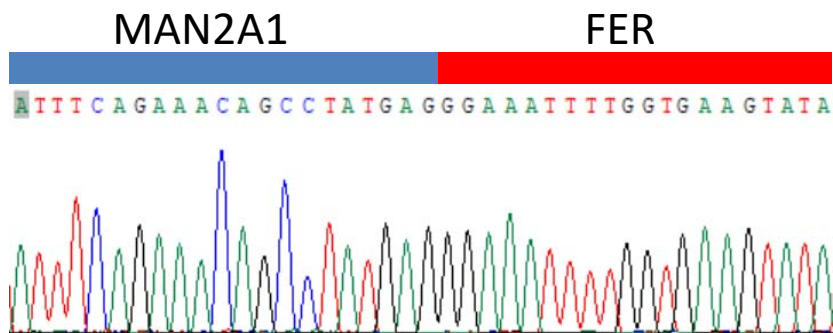

Sample #29

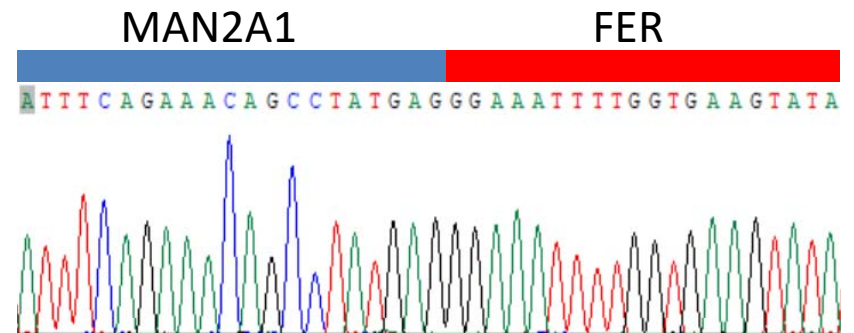



Sample #41

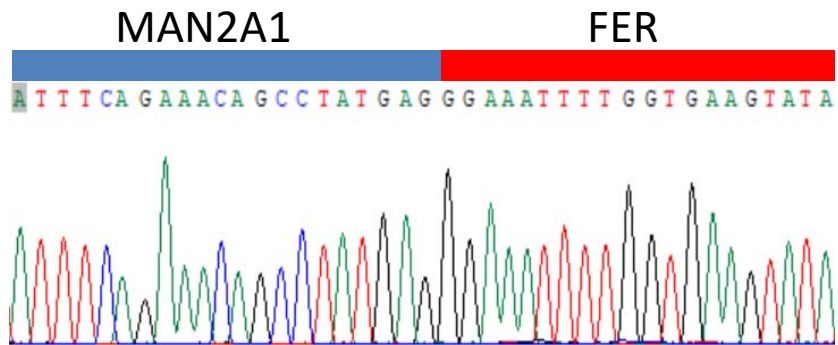

Sample #39

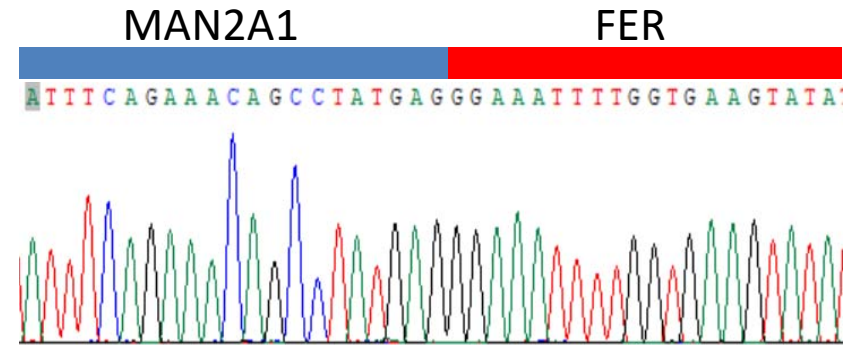

Sample #37

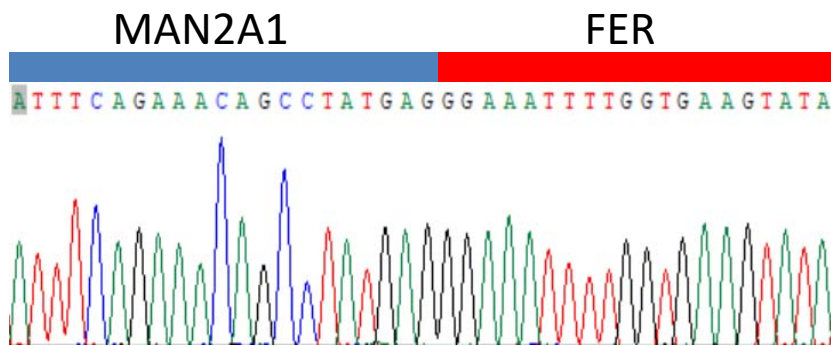

Sample #77

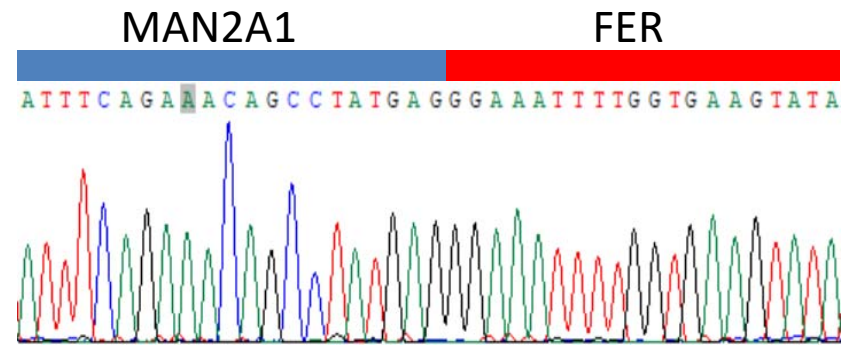

SLC45A2-AMACR

Sample #34

Sample #19

SLC45A2

AMACR

SLC45A2

AMACR

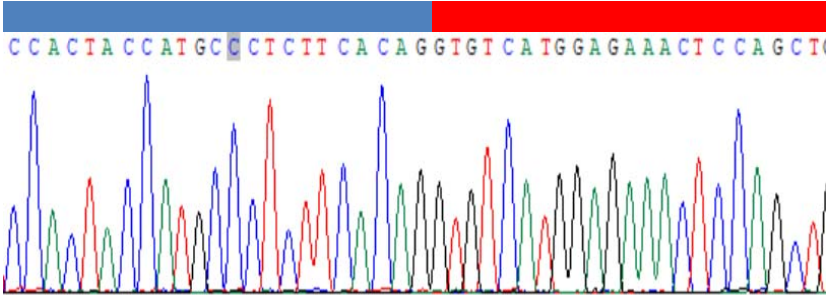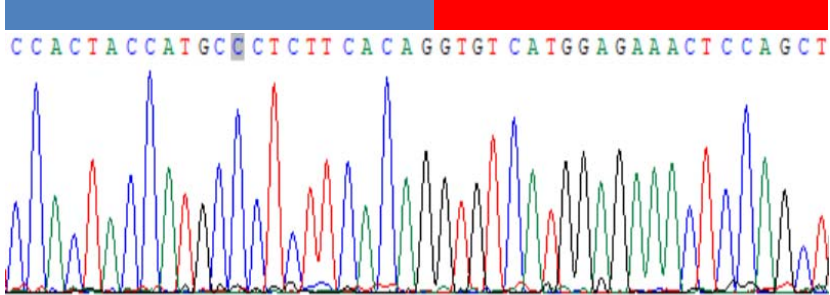

Sample #40

Sample #8

SLC45A2

AMACR

SLC45A2

AMACR

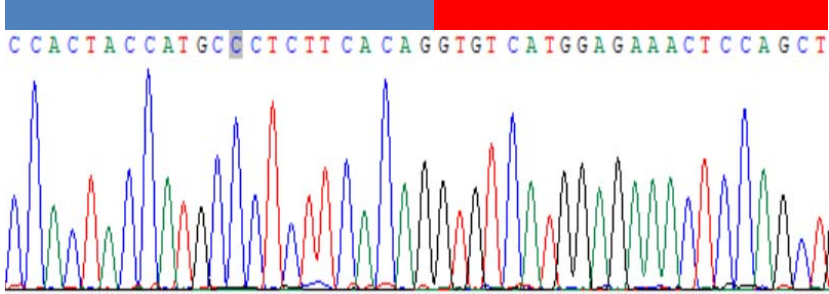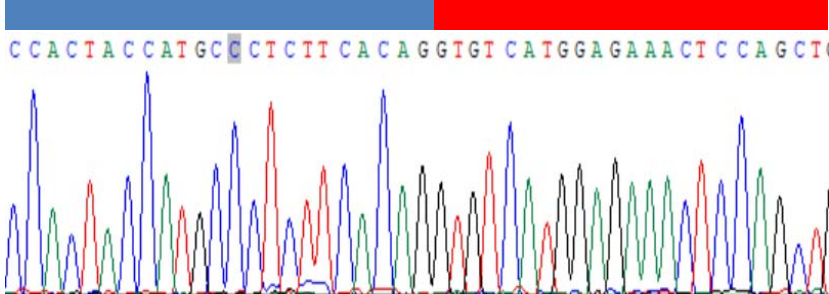



Sample #35

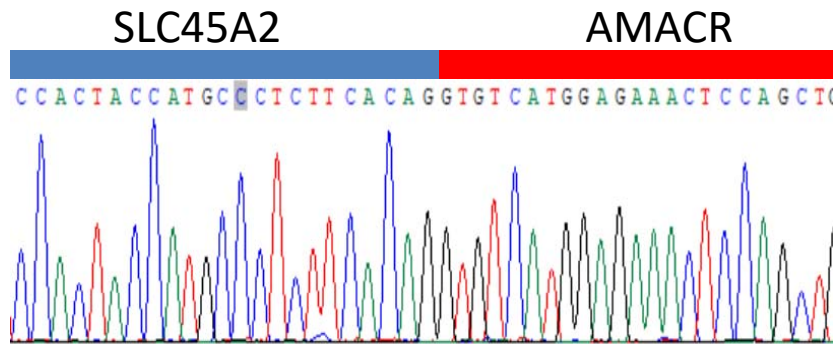

Sample #50

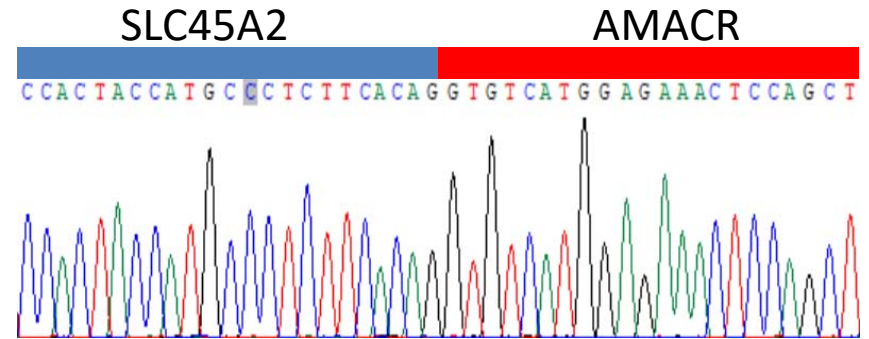

Sample #15

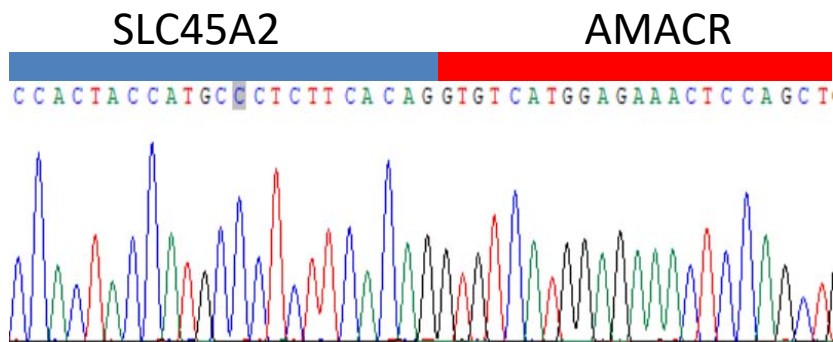

Sample #6

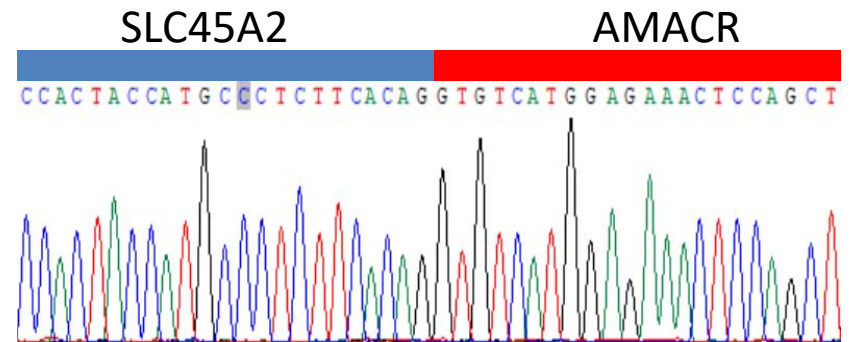

Sample #115

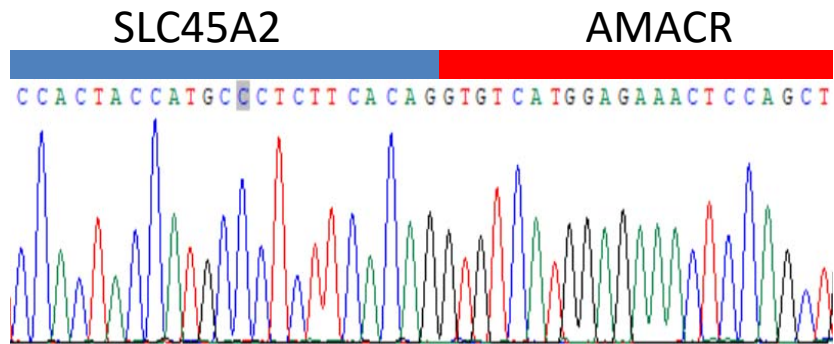

Sample #32

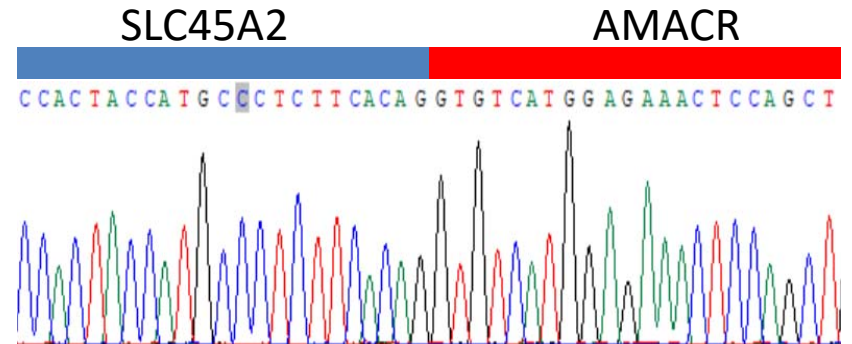

Sample #89

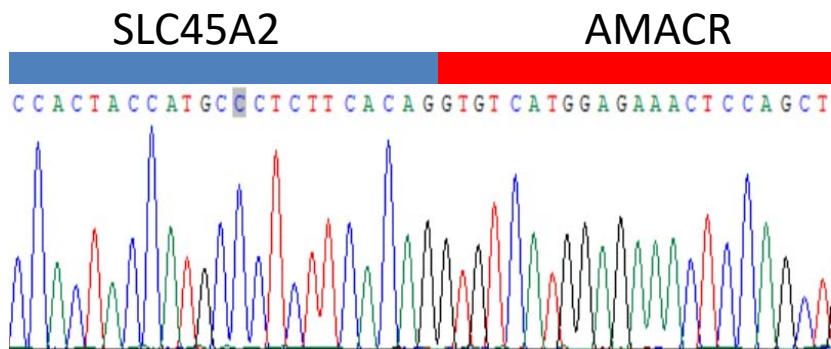

Sample #91

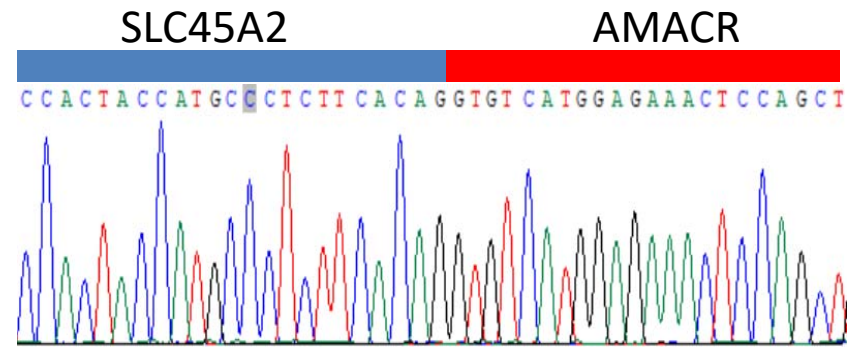

Pten-NOLC1

Sample #34

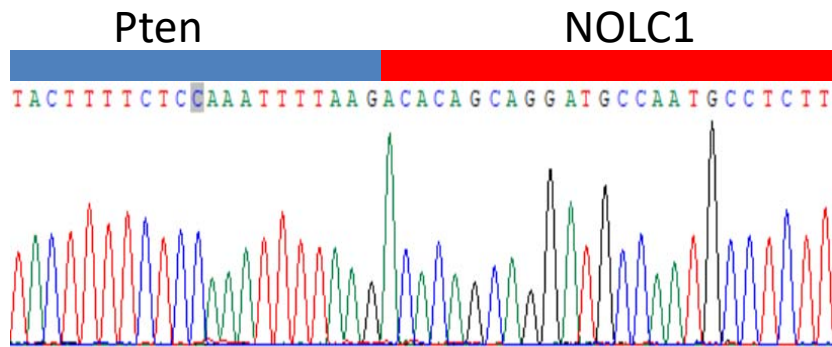

Sample #28

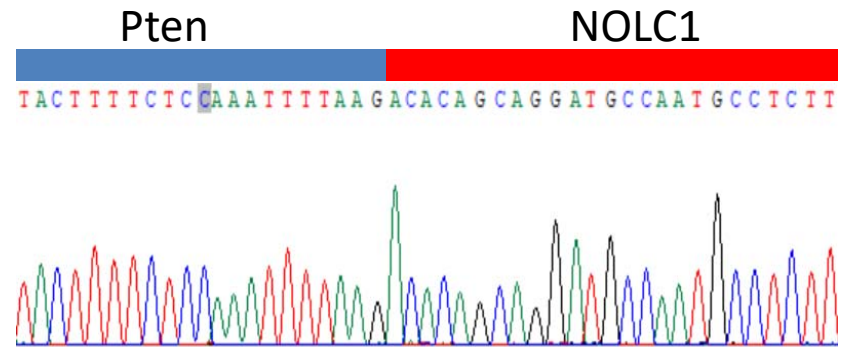

Sample #18

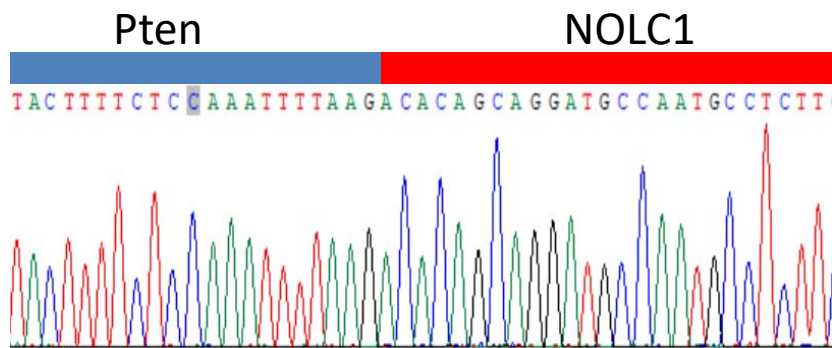

Sample #1

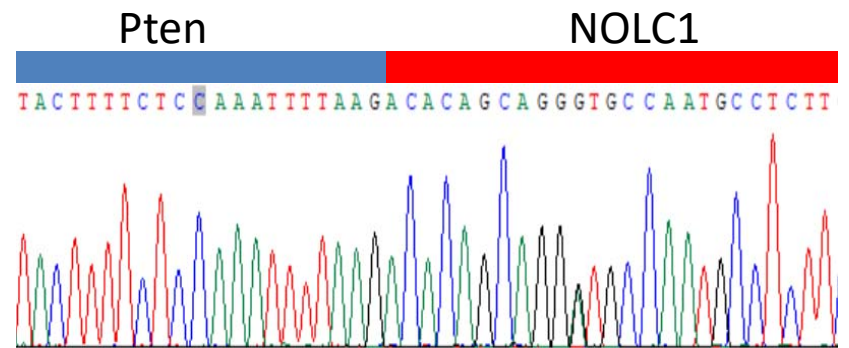

Sample #6

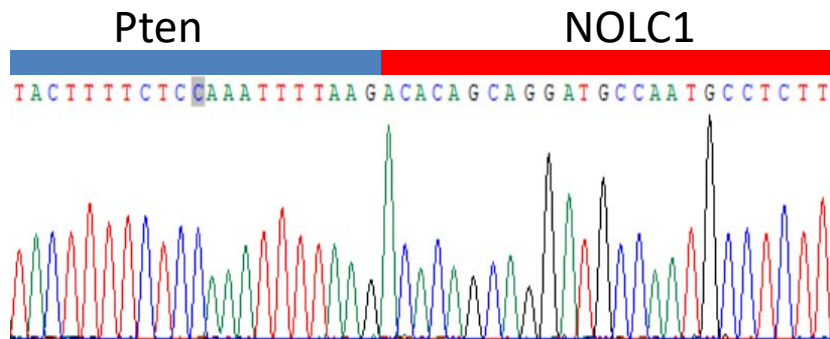

Sample #41

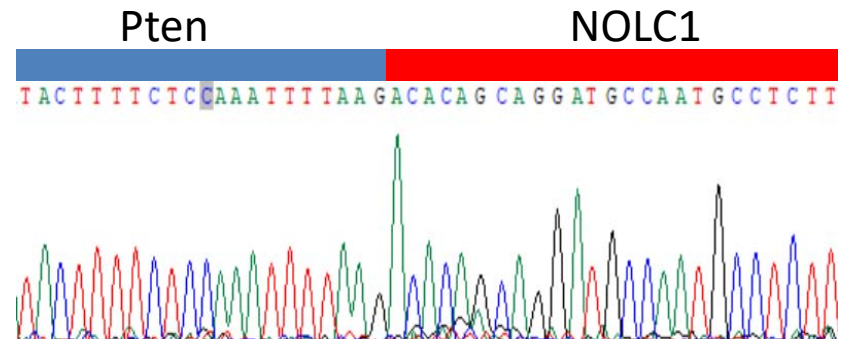

Sample #24

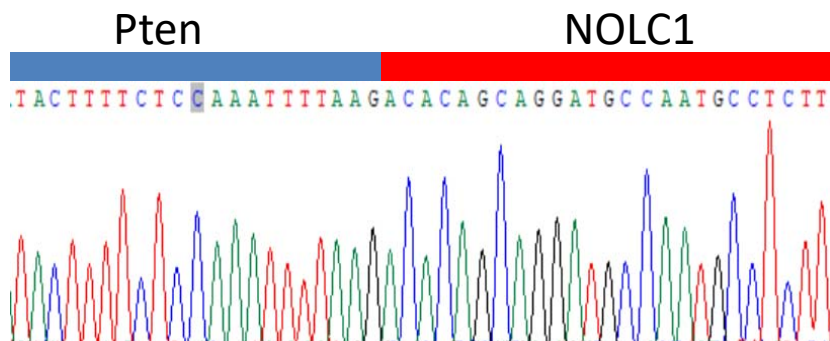

Sample #88

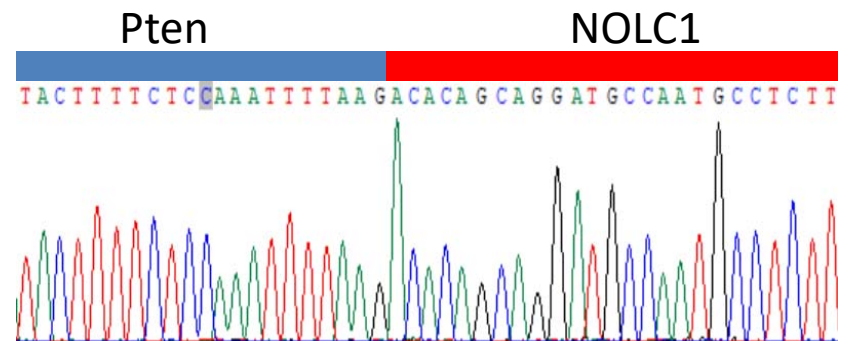

Sample #57

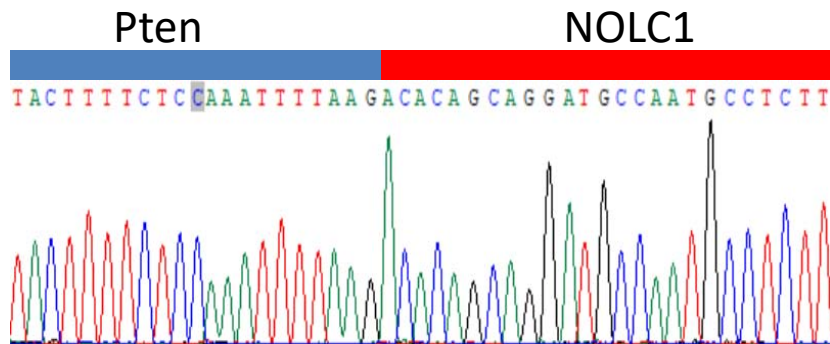

Sample #55

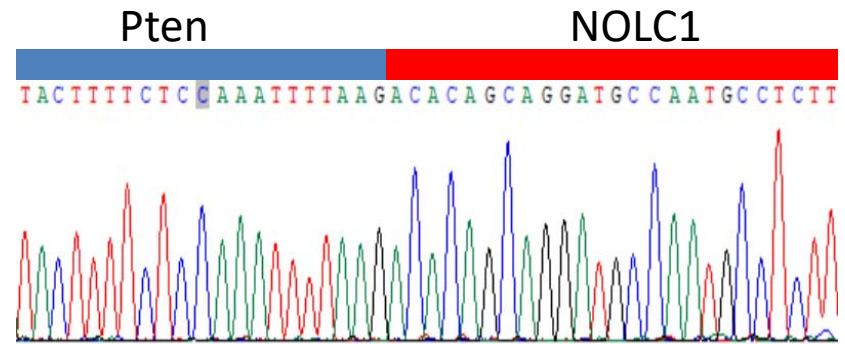

Sample #85

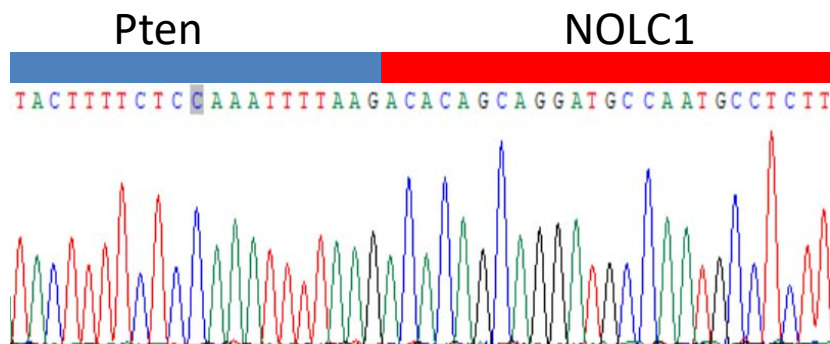

Sample #134

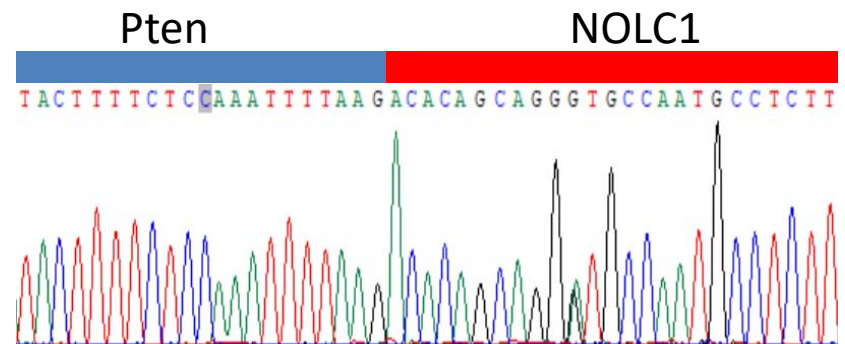

Supplement: 41598_2021_96528_MOESM1_ESM.pdf [file 41598_2021_96528_MOESM1_ESM.pdf]
